# Supplementary material for: Inverse Design of Hybrid Organic–Inorganic Perovskites with Suitable Bandgaps via Proactive Searching Progress
Source: PubMed Central journal article supplement — ACS Omega. 2022 Jun 10;7(25):21583–94. doi: 10.1021/acsomega.2c01380 (PMC9245129; doi:10.1021/acsomega.2c01380), 2022-06-10
Supplement: ao2c01380_si_001.pdf [file ao2c01380_si_001.pdf]

# Supporting Information

## Inverse Design of Hybrid Organic-Inorganic Perovskites with Suitable Bandgaps via Proactive Searching Progress

Tian Lu<sup>a</sup>, Hongyu Li<sup>a</sup>, Minjie Li<sup>b,c\*</sup>, Shenghao Wang<sup>a,\*</sup>, Wencong Lu<sup>a,b,c\*</sup>

<sup>a</sup> Materials Genome Institute, Shanghai University, Shanghai 200444, China

<sup>b</sup> Department of Chemistry, College of Sciences, Shanghai University, Shanghai 200444, China

<sup>c</sup> Zhejiang Laboratory, Hangzhou 311100, China

\*Corresponding Authors.

E-mail addresses: [minjieli@shu.edu.cn](mailto:minjieli@shu.edu.cn) (M.J. Li); [shenghaowang@shu.edu.cn](mailto:shenghaowang@shu.edu.cn) (S.H. Wang); [wclu@shu.edu.cn](mailto:wclu@shu.edu.cn) (W.C. Lu)

# Contents

|                                                                     |    |
|---------------------------------------------------------------------|----|
| Section S1 Codes for Training Process.....                          | 3  |
| Code S1 Dealing with multiple target values of singular sample..... | 3  |
| Code S2 Generating Descriptors.....                                 | 5  |
| Code S3 Searching Optimal Sample Distribution .....                 | 17 |
| Code S4 Feature Selection .....                                     | 19 |
| Code S5 SHAP Analysis.....                                          | 21 |
| Code S6 Hyper-parameter Optimization .....                          | 23 |
| Code S7 Weighted Voting Regressor .....                             | 25 |
| Code S8 SHAP Analysis for Weighted Voting Regressor .....           | 27 |
| Code S9 Proactive Searching Progress (PSP).....                     | 42 |
| Section S2 Other Figures and Tables.....                            | 44 |

## Section S1 Codes for Training Process

This section provides the detailed instructions to use our inhouse package to realize the steps and functions in the training progress. Before reproduce the steps, make sure to install the package “fast-machine-learning” by running “pip install fast-machine-learning” in cmd. The PyPI website is: <https://pypi.org/manage/project/fast-machine-learning/release/0.0.2.0/>. The training process is based on the version of 0.0.2.0, and the API functions might be changed in later developments.

The code in each step will be illustrated in general, and the code files are supplemented as the supporting files at <https://github.com/luktian/InverseDesignViaPSP>. The data set used in this manuscript and the relevant output files are also attached at the GitHub.

### Code S1 Dealing with multiple target values of singular sample

As shown in Figure S1, the raw sample set (loaded from “code1/extracted\_samples\_1159.xlsx” in supporting files) was processed using the module “fml.targets.DealMultipleTarget”, in which the formulas were identified using the module “fml.formulars.SplitFormular”. The sample number reduced to 437 from 1159, in which the details could be seen in the variable “dealed\_data” or the output excel file “./code1/pruned\_samples\_437.xlsx”.

From the variable “counters”, more information could be accessible to the readers. Typically, the bandgap of the identical HOIP material MAPbI<sub>3</sub> had 340 diverse values ranging from 1.45 ~ 2.0 eV, which may be caused by the experimental error or the diverse conditions. As shown in Table S1, there are 176 samples owned with bandgap 1.50 eV while the second top is 54 samples with 1.51 eV. After being processed by using the dealing method “prone\_mean” in the module “fml.targets.DealMultipleTarget”, the bandgap of MAPbI<sub>3</sub> was adapted to 1.504 eV. Other identical HOIPs also had the multiple bandgap values. For example, MAPbBr<sub>3</sub> had 51 diverse bandgap values with the adapted value of 2.298 eV, while FAPbI<sub>3</sub> had 33 diverse values and the adapted value of 1.519 eV. For more details, it might be possible for readers to inspect the variables in code or the provided supporting data files in directory “./code1”.

```

from fml.data import read_data
from fml.formulars import SplitFormular
from fml.targets import DealMultipleTarget
import numpy as np

# Load the 1159 raw samples pre-extracted from 9509 publications
data = read_data("extracted_samples_1159.xlsx") # data is a dataframe
raw_formulars = data.PL
data.index = raw_formulars
raw_bg = data.PLBandGap

# Some unregular formular ratios are also considered
unregular_formular_ratios = [
    [1.05, 1, 3],
    [1, 1.1, 3.3],
    [0.97, 1, 2.77],
    [0.966, 1, 2.90],
    [0.9575, 1, 2.9575],
    [1, 1.05, 3],
    [1.02, 1, 3],
    [0.95, 1, 3],
    [1.05, 1, 3.05],
    [0.99, 1, 3],
]

# Use the module fml.formulars.SplitFormular to split the formualrs into string format
splitted_formular, unsplitted_formular = SplitFormular(unregular_formular_ratios).\
    split_formulars(raw_formulars.values, output=str)

# Use the module fml.targets.DealMultipleTarget to deal with
# the multiple target values of one singular sample
#
# The deal method is selected as "prone_mean" that considers
# the standard distribution of the targets. The deal alternatives
# could also be "mean", "max", "min"
#
# the first column of dealed_data is the formulars
# the second column of dealed_data is the processed band gaps
# the counters contain the statistical information of the multiple target values
dealed_data, counters = DealMultipleTarget(deal="prone_mean").deal_with_multiple_data(
    np.concatenate([np.array(splitted_formular).reshape(-1, 1), raw_bg.values.reshape(-1, 1)], axis=1)
)

# The dealed_data could be outputed in an excel by using dataframe
import pandas as pd
pd.DataFrame(dealed_data, columns=["PL", "Band Gap"]).to_excel("pruned_samples_437.xlsx", index=None)

```

Figure S1 The code to prune the multiple target values of singular sample

Table S1 The diverse bandgap values for the identical HOIPs

| MAPbI <sub>3</sub> |        | MAPbBr <sub>3</sub> |        | FAPbI <sub>3</sub> |        |
|--------------------|--------|---------------------|--------|--------------------|--------|
| Target values (eV) | Counts | Target values (eV)  | Counts | Target values (eV) | Counts |
| 1.5                | 176    | 2.3                 | 29     | 1.48               | 5      |
| 1.51               | 54     | 2.17                | 3      | 1.47               | 3      |
| 1.55               | 24     | 2.25                | 3      | 1.51               | 3      |
| 1.53               | 18     | 2.02                | 2      | 1.53               | 3      |
| 1.58               | 14     | 2.18                | 2      | 1.55               | 3      |
| 1.57               | 12     | 2.2                 | 2      | 1.41               | 2      |
| 1.56               | 9      | 2.42                | 2      | 1.43               | 2      |
| 1.6                | 8      | 1.72                | 1      | 1.5                | 2      |
| 1.52               | 6      | 2.16                | 1      | 1.52               | 2      |
| 1.49               | 4      | 2.24                | 1      | 1.45               | 1      |
| 1.59               | 4      | 2.27                | 1      | 1.46               | 1      |
| 1.54               | 2      | 2.28                | 1      | 1.49               | 1      |
| 2.0                | 2      | 2.35                | 1      | 1.52125            | 1      |
| 1.565              | 1      | 2.38                | 1      | 1.522054236        | 1      |
| 1.45               | 1      | 2.43                | 1      | 1.528              | 1      |
| 1.47               | 1      |                     |        | 1.56               | 1      |

|                      |   |                      |  |                      |   |
|----------------------|---|----------------------|--|----------------------|---|
| 1.7                  | 1 |                      |  | 2.41                 | 1 |
| 1.504                | 1 |                      |  |                      |   |
| 1.566                | 1 |                      |  |                      |   |
| 1.633                | 1 |                      |  |                      |   |
| Processed Value (eV) |   | Processed Value (eV) |  | Processed Value (eV) |   |
| 1.504                |   | 2.298                |  | 1.519                |   |

## Code S2 Generating Descriptors

As shown in Figure S2, the 437 pruned HOIP formulas along with their bandgap values were loaded from the file “code1/pruned\_samples\_437.xlsx” resulted from **Code S1**. The “fml.formulars.SplitFormular” module was used again to transform the string formulas into the dictionary format that would be passed into the class function “describe\_formular” of “HOIP” instance, which could generate the pre-defined descriptors. The descriptors were divided into three main parts, namely 34 base descriptors, 8 string descriptors, and 66 other descriptors. The descriptors were listed in Table S2, which were marked with the original sources. The atomic descriptors were collected from Villars Database<sup>1</sup> and Mendeleev Python Package<sup>2</sup>, while the part of organic properties was calculated by using Gaussian<sup>3</sup> and Multiwfn<sup>4</sup> software. The details of base and string descriptors were illustrated in Table S3, and more information could be assessed in the documents of Villars Database<sup>1</sup> and Mendeleev Python Package<sup>2</sup>. We collected 80 organic cations that are suitable for A site in ABX<sub>3</sub> HOIPs, whose structures and origins could be seen in Table S4.

By switching the Boolean values in the module “HOIP”, three parts of descriptors could be generated optionally. The options of “base”, “ionization”, “ionic\_radii” refer to the base descriptors, while the options “str\_bool” and “other” refer to string and other descriptors. The option “onehot” could be used to control whether the string descriptors are encoded into numeric data or not.

At last, the generated data set was represented in a table format with the row referring to sample indexes and the columns referring to bandgap and descriptors. The data file was outputted as the “./code2/HOIP\_dataset\_437.xlsx” in the supporting files.

```

from fml.data import read_data
from fml.formulars import SplitFormular
from fml.descriptors import HOIP
import pandas as pd

# Load the 437 pruned samples in dataframe format
# Index refers to the formular strings, and the first column is the pruned band gaps
bandgap_data = read_data("../code1/pruned_samples_437.xlsx")
formulars = bandgap_data.index.values
bandgaps = bandgap_data.iloc[:, 0].values

# Some unregular formular ratios are also considered
unregular_formular_ratios = [
    [1.05, 1, 3],
    [1, 1.1, 3.3],
    [0.97, 1, 2.77],
    [0.966, 1, 2.90],
    [0.9575, 1, 2.9575],
    [1, 1.05, 3],
    [1.02, 1, 3],
    [0.95, 1, 3],
    [1.05, 1, 3.05],
    [0.99, 1, 3],
]

# Split the pruned formular strings into dict format that will be passed into
# the class module HOIP to generate descriptors
splitted_formulars, _ = SplitFormular(unregular_formular_ratios).split_formulars(formulars)

# The class HOIP is used to generate descriptors
# Firstly instantiate an HOIP object with the bool options as followed
# The base refers to use the base descriptors
# The str_bool refers to use the string descriptors
# The other refers to 66 other descriptors
# Ionization and ionic radii are calculated separately
hoip = HOIP(base=True, str_bool=True, other=False, ionization=True, ionic_radii=True)

# Use the class function "describe_formular" of hoip object to calculate descriptors
# Pass a singular formular, which is formatted as:
# formular = [{atom:ratio, atom:ratio, ...},
#             {atom:ratio, atom:ratio, ...},
#             {atom:ratio, atom:ratio, ...}]
# The first dict refers to A site, the second and third refer to B and C sites
# Switch the onehot to True. The string descriptors will be generated in numeric data
descriptors = []
for formular, bg in zip(splitted_formulars, bandgaps):
    descriptors.append(hoip.describe_formular(formular, onehot=True))
# Collecting descriptors into variable "descriptors" and concatenate into a dataframe
descriptors = pd.concat(descriptors, axis=1).T

# Concatenate the band gap and descriptors into one sheet
dataset = pd.concat([bandgap_data, descriptors], axis=1)
dataset.to_excel("HOIP_dataset_437.xlsx")

```

Figure S2 The code to generate descriptors

Table S2 The details of the assembled descriptors from Villars Databases, Mendeleev Package, and the quantum-based results.

| Descriptor Types | Descriptor names | Properties in Villars Database                             | Properties in Mendeleev Package | Properties for Organic fragments |
|------------------|------------------|------------------------------------------------------------|---------------------------------|----------------------------------|
| base descriptors | atomic_number    | Atomic number start counting left top, left-right sequence | atomic_number                   |                                  |
|                  | quantum_number   | quantum number                                             | period                          |                                  |
|                  | atomic_weight    | atomic weight                                              | atomic_weight                   | molecular_weight                 |
|                  | group_number     | group number                                               |                                 |                                  |

|                         |                                       |                 |                            |
|-------------------------|---------------------------------------|-----------------|----------------------------|
| valence_electron_number | valence electron number               |                 |                            |
| melting_point           | temperature melting                   | melting_point   |                            |
| boiling_point           | temperature boiling                   | boiling_point   | Boiling temperature        |
| enthalpy_vaporization   | enthalpy vaporization                 |                 | Evaporation enthalpy       |
| enthalpy_melting        | enthalpy melting                      |                 |                            |
| enthalpy_atomization    | enthalpy atomization                  |                 |                            |
| volume_Villars          | volume atom                           |                 |                            |
| volume_Mendeleev        |                                       | atomic_volume   | atomic volume              |
| en_martynov             | electronegativity (Martynov&Batsanov) |                 |                            |
| en_pauling              | electronegativity (Pauling)           | en_pauling      |                            |
| en_allred               | electronegativity (Allred-Rochow)     |                 |                            |
| en_mulliken             | electronegativity absolute            |                 | Mulliken electronegativity |
| en_allen                |                                       | en_allen        |                            |
| en_ghosh                |                                       | en_ghosh        |                            |
| first_ionization        | energy ionization first               |                 |                            |
| second_ionization       | energy ionization second              |                 |                            |
| third_ionization        | energy ionization third               |                 |                            |
| chemical_potential      | chemical potential Miedema            |                 | chemical potential         |
| radii_pseudo_zunger     | radii pseudo-potential (Zunger)       |                 |                            |
| radii_ionic_yagoda      | radii ionic (Yagoda)                  |                 |                            |
| radii_metal_waber       | radii metal (Waber)                   | metallic_radius |                            |
| atomic_radii            |                                       | atomic_radii    | atomic radii               |

|                    |                                |                                                                  |                       |                            |
|--------------------|--------------------------------|------------------------------------------------------------------|-----------------------|----------------------------|
|                    | density                        |                                                                  | density               | density                    |
|                    | dipole_polarizability          |                                                                  | dipole_polarizability | molecular polarity index   |
|                    | electron_affinity              |                                                                  | electron_affinity     | vertical electron affinity |
|                    | evaporation_heat               |                                                                  | evaporation_heat      | evaporation enthalpy       |
|                    | lattice_constant               |                                                                  | lattice_constant      |                            |
|                    | proton_affinity                |                                                                  | proton_affinity       |                            |
|                    | ionization                     |                                                                  | ionization            | ionization                 |
|                    | _ionic_radii_                  |                                                                  | ionic_radii           | ionic_radii                |
| string descriptors | block                          |                                                                  | block                 |                            |
|                    | lattice_structure              |                                                                  | lattice_structure     |                            |
|                    | cas                            |                                                                  | cas                   |                            |
|                    | goldschmidt_class              |                                                                  | goldschmidt_class     |                            |
|                    | geochemical_class              |                                                                  | geochemical_class     |                            |
|                    | is_monoisotopic                |                                                                  | is_monoisotopic       |                            |
|                    | is_radioactive                 |                                                                  | is_radioactive        |                            |
|                    | name                           |                                                                  | name                  |                            |
| other descriptors  | atomic_number_2                | Periodic number start counting left bottom, left-right sequence  |                       |                            |
|                    | atomic_number_3                | Periodic number start counting top right, right-left sequence    |                       |                            |
|                    | atomic_number_4                | Periodic number start counting bottom right, right-left sequence |                       |                            |
|                    | enthalpy_surface_miedema       | enthalpy surface Miedema                                         |                       |                            |
|                    | enthalpy_vacancies_miedema     | enthalpy vacancies Miedema                                       |                       |                            |
|                    | mass_attenuation_coef_mokalpha | mass attenuation coefficient for MoKalpha                        |                       |                            |
|                    | mass_attenuation_coef_cr       | mass attenuation                                                 |                       |                            |



|                                       |                                                    |                    |  |
|---------------------------------------|----------------------------------------------------|--------------------|--|
| kalpha                                | coefficient<br>CrKalpha                            |                    |  |
| mass_attenuation_coef_cr<br>kalpha_2  | mass attenuation<br>coefficient for<br>CuKalpha    |                    |  |
| mass_attenuation_coef_fe<br>kalpha    | mass attenuation<br>coefficient<br>FeKalpha        |                    |  |
| atomic_electron_scatterin<br>g_factor | atomic electron<br>scattering factor<br>at 0.5 (/) |                    |  |
| work_function                         | work function                                      |                    |  |
| nws1_3_miedema                        | nWS1/3<br>Miedema                                  |                    |  |
| nuclear_charge_effective_<br>slater   | nuclear charge<br>effective Slater                 |                    |  |
| charge_nuclear_effective_<br>clementi | charge nuclear<br>effective<br>(Clementi)          |                    |  |
| energy_cohesive_brewer                | energy cohesive<br>Brewer                          |                    |  |
| modulus_compression                   | modulus<br>compression                             |                    |  |
| modulus_bulk                          | modulus bulk                                       |                    |  |
| modulus_rigidity                      | modulus rigidity                                   |                    |  |
| modulus_Young                         | modulus Young                                      |                    |  |
| mendeleviev_number                    | Mendeleviev<br>Number                              | mendeleviev_number |  |
| mendeleviev_number_2                  | Mendeleviev<br>Number                              |                    |  |
| mendeleviev_number_3                  | Mendeleviev<br>Number                              |                    |  |
| mendeleviev_number_4                  | Mendeleviev<br>Number                              |                    |  |
| pettifor_number                       | Mendeleviev<br>Pettifor                            |                    |  |
| pettifor_number_regular               | Mendeleviev<br>Pettifor regular                    |                    |  |
| glawe_number                          |                                                    | glawe_number       |  |
| mendeleviev_chemisits_seq<br>uence    | Mendeleviev<br>chemists<br>sequence                |                    |  |
| mendeleviev_t_d_left                  | Mendeleviev t-d<br>start left                      |                    |  |

|                                       |                                                         |                               |  |
|---------------------------------------|---------------------------------------------------------|-------------------------------|--|
| mendelev_t_d_right                    | Mendelev t-d<br>start right                             |                               |  |
| mendelev_d_t_left                     | Mendelev d-t<br>start left                              |                               |  |
| mendelev_d_t_right                    | Mendelev d-t<br>start right                             |                               |  |
| mendelev_h_li_na_be_mg_block_t_d_left | Mendelev<br>H,Li,Na,Be,Mg<br>as block t-d start<br>left |                               |  |
| mendelev_h_be_mg_t_d_left             | Mendelev<br>H,Be,Mg t-d start<br>left                   |                               |  |
| mendelev_h_li_na_be_mg_t_d_left       | Mendelev<br>H,Li,Na,Be,Mg t-<br>d start left            |                               |  |
| distance_valence_electron             | distance valence<br>electron<br>(Schubert)              |                               |  |
| distance_core_electron                | distance core<br>electron<br>(Schubert)                 |                               |  |
| v2_3_miedema                          | V2/3 Miedema                                            |                               |  |
| atomic_env_number                     | atomic<br>environment<br>number (Villars,<br>Daams)     |                               |  |
| covalent_radius_cordero               |                                                         | covalent_radius_cordero       |  |
| covalent_radius_pyykko                |                                                         | covalent_radius_pyykko        |  |
| covalent_radius_bragg                 |                                                         | covalent_radius_bragg         |  |
| covalent_radius_slater                |                                                         | covalent_radius_slater        |  |
| covalent_radius_pyykko_double         |                                                         | covalent_radius_pyykko_double |  |
| covalent_radius_pyykko_triple         |                                                         | covalent_radius_pyykko_triple |  |
| vdw_radius                            |                                                         | vdw_radius                    |  |
| vdw_radius_bondi                      |                                                         | vdw_radius_bondi              |  |
| vdw_radius_truhlar                    |                                                         | vdw_radius_truhlar            |  |
| vdw_radius_rt                         |                                                         | vdw_radius_rt                 |  |
| vdw_radius_batsanov                   |                                                         | vdw_radius_batsano            |  |

|                           |  |                           |  |
|---------------------------|--|---------------------------|--|
|                           |  | v                         |  |
| vdw_radius_dreiding       |  | vdw_radius_dreiding       |  |
| vdw_radius_uff            |  | vdw_radius_uff            |  |
| vdw_radius_mm3            |  | vdw_radius_mm3            |  |
| vdw_radius_alvarez        |  | vdw_radius_alvarez        |  |
| atomic_radius_rahm        |  | atomic_radius_rahm        |  |
| atomic_weight_uncertainty |  | atomic_weight_uncertainty |  |
| gas_basicity              |  | gas_basicity              |  |
| heat_of_formation         |  | heat_of_formation         |  |
| c6                        |  | c6                        |  |
| c6_gb                     |  | c6_gb                     |  |
| metallic_radius_c12       |  | metallic_radius_c12       |  |
| dipole_polarizability_unc |  | dipole_polarizability_unc |  |
| specific_heat             |  | specific_heat             |  |
| fusion_heat               |  | fusion_heat               |  |
| thermal_conductivity      |  | thermal_conductivity      |  |
| abundance_crust           |  | abundance_crust           |  |
| abundance_sea             |  | abundance_sea             |  |

Table S3 The details of base and string descriptors

| Descriptor names        | Descriptions                          | Unit                             | Examples                                     |
|-------------------------|---------------------------------------|----------------------------------|----------------------------------------------|
| atomic_number           | Number in periodic table              | /                                | Cl (17)                                      |
| quantum_number          | Quantum Number                        | /                                | Cl (3)                                       |
| atomic_weight           | Atomic weight                         | /                                | Cl (35.45)                                   |
| group_number            | Group number                          | /                                | Cl (7)                                       |
| valence_electron_number | Valence electron number               | /                                | Cl (7)                                       |
| melting_point           | Melting point                         | K                                | Cl (172 K)                                   |
| boiling_point           | Boiling point                         | K                                | Cl (238.6 K)                                 |
| enthalpy_vaporization   | Vaporization enthalpy                 | kJ/mol                           | Cl (20.42 kJ/mol)                            |
| enthalpy_melting        | Melting enthalpy                      | kJ/mol                           | Cl (6.41 kJ/mol)                             |
| enthalpy_atomization    | Atomization enthalpy                  | kJ/mol                           | Cl (121.7 kJ/mol)                            |
| volume_Villars          | Volume from Villars database          | 10 <sup>-2</sup> nm <sup>3</sup> | Cl (2.886 10 <sup>-2</sup> nm <sup>3</sup> ) |
| volume_Mendeleev        | Volume from Mendeleev package         | cm <sup>3</sup> /mol             | Cl (18.7 cm <sup>3</sup> /mol)               |
| en_martynov             | Electronegativity (Martynov&Batsanov) | /                                | Cl (2.98)                                    |
| en_pauling              | Electronegativity (Pauling)           | /                                | Cl (3)                                       |
| en_allred (EA)          | Electronegativity (Allred-Rochow)     | /                                | Cl (2.83)                                    |
| en_mulliken             | Electronegativity absolute            | //                               | Cl (8.3)                                     |
| en_allen (EN)           | Electronegativity                     | /                                | Cl (16.97)                                   |

|                            |                                      |                   |                                                           |
|----------------------------|--------------------------------------|-------------------|-----------------------------------------------------------|
| en_ghosh                   | Electronegativity                    | /                 | Cl (0.264)                                                |
| first_ionization           | First ionization energy              | kJ/mol            | Cl (1251.1 kJ/mol)                                        |
| second_ionization          | Second ionization energy             | kJ/mol            | Cl (2297 kJ/mol)                                          |
| third_ionization (TI)      | Third ionization energy              | kJ/mol            | Cl (3822 kJ/mol)                                          |
| chemical_potential         | Chemical potential                   | /                 | Cl (0)                                                    |
| radii_pseudo_zunger (RPZ)  | Radii pseudo-potential (Zunger)      | a.u.              | Cl (0.92 a.u.)                                            |
| radii_ionic_yagoda         | Radii ionic (Yagoda)                 | Å                 | Cl (0.2 Å)                                                |
| radii_metal_waber          | Radii metal (Waber)                  | Å                 | Cl (30 Å)                                                 |
| atomic_radii               | Radii from Mendeleev package         | pm                | H (79 pm)                                                 |
| density                    | Density                              | g/cm <sup>3</sup> | Cl (1.4 g/cm <sup>3</sup> )                               |
| dipole_polarizability (DP) | Dipole polarizability                | a.u.              | Cl (11.083 a.u.)                                          |
| electron_affinity          | Electron affinity                    | eV                | Cl (-11.5 eV)                                             |
| evaporation_heat           | Heat evaporation                     | kJ/mol            | Cl (6.52 kJ/mol)                                          |
| lattice_constant (LS)      | Lattice constant of element crystal  | /                 | Cl (5.26)                                                 |
| proton_affinity            | Proton affinity                      | kJ/mol            | Cl (369.2 kJ/mol)                                         |
| ionization                 | Ionization depending on degree       | eV                | Cl <sup>-</sup> (12.97 eV)<br>Pb <sup>2+</sup> (15.03 eV) |
| _ionic_radii_              | Ionic radii depending on charge      | Å                 | Cl <sup>-</sup> (1.81 Å)<br>Pb <sup>2+</sup> (1.19 Å)     |
| block                      | Block position in periodic table     | /                 | Cl (p)                                                    |
| lattice_structure          | Lattice structure of element crystal | /                 | Cl (ORC)<br>ORC refers to Primitive orthorhombic          |
| cas                        | Chemical Abstracts Serice identifier | /                 | Cl (7782-50-5)                                            |
| goldschmidt_class          | Goldschmidt classification           | /                 | Cl (lithophile)                                           |
| geochemical_class          | Geochemical classification           | /                 | Cl (semi-volatile)                                        |
| is_monoisotopic (IM)       | Is the element monoisotopic          | /                 | I (True)                                                  |
| is_radioactive             | Is the element radioactive           | /                 | Cl (True)                                                 |
| name (N)                   | Element name                         | /                 | Cl (Chlorine)                                             |

Table S4 Collected structures of organic cations that are suitable for the A site in ABX<sub>3</sub> HOIPs.

| Cation Codes | Cation Names               | Structures                                                                           | Reference |
|--------------|----------------------------|--------------------------------------------------------------------------------------|-----------|
| A            | ammonium                   |  | 5         |
| AA           | dimethylammonium           |  | 6         |
| AB           | N,N-dimethylmethylammonium |  | 7         |

|    |                           |                                                                                      |   |
|----|---------------------------|--------------------------------------------------------------------------------------|---|
| AC | propan-1-aminium          | 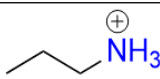   | 6 |
| AD | propan-2-aminium          |    | 6 |
| AE | hydroxylammonium          | $\text{HO}-\text{NH}_3^+$                                                            | 7 |
| AF | 1-aminoethan-1-iminium    |    | 6 |
| AG | hydrazinium               | $\text{H}_2\text{N}-\text{NH}_3^+$                                                   | 7 |
| AH | azetidin-1-ium            |    | 7 |
| AI | thiazol-3-ium             |    | 7 |
| AJ | 1H-pyrrol-1-ium           |   | 7 |
| AK | diethylammonium           |  | 6 |
| AL | benzenaminium             |  | 6 |
| AM | aziridin-1-ium            |  | 7 |
| AN | pyrrolidin-1-ium          |  | 6 |
| AO | azepan-1-ium              |  | 7 |
| AP | piperidin-1-ium           |  | 6 |
| AQ | pyridin-2-ylmethanaminium |  | 8 |
| AR | trifluoromethanaminium    | $\text{CF}_3-\text{NH}_3^+$                                                          | 9 |

|    |                                     |  |   |
|----|-------------------------------------|--|---|
| AS | difluoromethanaminium               |  | 9 |
| AT | fluoromethanaminium                 |  | 9 |
| AU | cyclohexylmethanaminium             |  | 6 |
| AV | hexan-1-aminium                     |  | 6 |
| AW | dodecan-1-aminium                   |  | 6 |
| AX | 2-methylpropan-2-aminium            |  | 6 |
| AY | N1,N1-diethylpropane-1,3-diaminium  |  | 6 |
| AZ | N1,N1-dimethylpropane-1,3-diaminium |  | 6 |
| BA | butan-1-aminium                     |  | 6 |
| BB | morpholin-4-ium                     |  | 6 |
| BC | cyclohexanaminium                   |  | 6 |
| BD | 2-(4-fluorophenyl)ethan-1-aminium   |  | 6 |
| BE | (4-fluorophenyl)methanaminium       |  | 6 |
| BF | propane-1,3-diaminium               |  | 6 |
| BG | 2,2-dimethylpropan-1-aminium        |  | 6 |
| BH | N1,N1-dimethylethane-1,2-diaminium  |  | 6 |

|    |                                          |                                                                                      |   |
|----|------------------------------------------|--------------------------------------------------------------------------------------|---|
| BI | butane-1,4-diaminium                     | 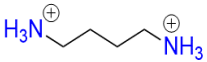   | 6 |
| BJ | 4-fluorobenzenaminium                    |    | 6 |
| BK | pyridin-1-ium                            |    | 6 |
| BL | 3-methylbutan-1-aminium                  |    | 6 |
| BM | hexan-1-aminium                          |    | 6 |
| BN | diisopropylammonium                      |    | 6 |
| BO | 1-(2-ammonioethyl)pyrrolidin-1-ium       |    | 6 |
| BP | piperazine-1,4-dium                      |   | 6 |
| BQ | 2,4,4-trimethylpentan-2-aminium          |  | 6 |
| BR | phenylmethanaminium                      |  | 6 |
| BS | benzene-1,4-diaminium                    |  | 6 |
| BT | (4-(trifluoromethyl)phenyl)methanaminium |  | 6 |
| BU | 4-(trifluoromethyl)benzenaminium         |  | 6 |
| BV | 4-methoxybenzenaminium                   |  | 6 |
| BW | 2-(4-methoxyphenyl)ethan-1-aminium       |  | 6 |
| EA | ethanaminium                             |  | 6 |

|    |                           |                                                                                      |    |
|----|---------------------------|--------------------------------------------------------------------------------------|----|
| ED | ethane-1,2-diaminium      | 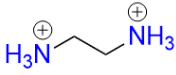   | 6  |
| FA | aminomethaniminium        |    | 6  |
| GA | diaminomethaniminium      |    | 6  |
| HE | 2-hydroxyethan-1-aminium  |    | 10 |
| IA | 1H-imidazol-3-ium         |    | 6  |
| MA | methanaminium             |    | 6  |
| PE | 2-phenylethan-1-aminium   |    | 6  |
| PY | 2-methylpropan-1-aminium  |   | 6  |
| SA | tetrafluoroborate         |  |    |
| XA | phenylmethylium           |  | 7  |
| XB | oxiran-1-ium              |  | 11 |
| XC | oxetan-1-ium              |  | 11 |
| XD | tetrahydro-1H-furan-1-ium |  | 11 |
| XE | hexahydropyrylium         |  | 11 |
| XF | oxepan-1-ium              |  | 11 |
| XG | thiiran-1-ium             |  | 12 |



|    |                              |  |    |
|----|------------------------------|--|----|
| XH | thietan-1-ium                |  | 12 |
| XI | tetrahydro-1H-thiophen-1-ium |  | 12 |
| XJ | hexahydrothiopyrylium        |  | 12 |
| XK | thiepan-1-ium                |  | 12 |
| XL | phosphiran-1-ium             |  | 12 |
| XM | phosphetan-1-ium             |  | 12 |
| XN | phospholan-1-ium             |  | 12 |
| XO | phosphinan-1-ium             |  | 12 |
| XP | phosphepan-1-ium             |  | 12 |
| XQ | sulfonium                    |  | 13 |
| XR | methylsulfonium              |  | 13 |
| XS | ethyloxonium                 |  | 13 |
| XT | methylphosphonium            |  | 13 |

## Code S3 Searching Optimal Sample Distribution

As shown in Figure S3, the data set (“./code2/HOIP\_dataset\_437.xlsx”) was preprocessed by using the module “fml.preprocessing.Preprocessing” under the criteria of trimming the variables that have missing values or standard values nearly to 0, bringing about 102 features left.

As for data set division, the most regular way is to divide the data set randomly into training and test sets, which however may cause the extreme unreasonable sample distribution for training set and result in an unilateral chemical space for fitting models. In practice, if a pair of training and test sets are generated by random splitting based on the packages such as scikit-learn<sup>14</sup> or NumPy<sup>15</sup>, the sample distribution is controlled by pseudo-random number generators, *e.g.*, Mersenne Twister in Python standard module “random” and NumPy module “numpy.random.MT19937” and PCG-64 in NumPy module “numpy.random.PCG64”, in which a fixed integer parameter named as random state or seed could always produce the same random sample sequence. By controlling the values of random state and test set size, the distributions of training and test sets could be optimized numerically, in which the sample distribution optimization is converted into a two-parameter optimization task. In this regard, HyperOpt<sup>16</sup> is employed as the backend to perform the optimization task for searching the optimal random state and test size efficiently, in which the package is built based on Bayes theory. In our inhouse code, such process could be realized by using the module “fml.sampling.HpSplit”. The parameter “rounds” and “cv” could control the searching iterations and the fitness type, in which “cv=True” means that the root mean squared error (RMSE) of leaving-one-out cross-validation (LOOCV) is used as the fitness value. The optimal random state and test size could be accessed in the variable “best\_params”. It should be noted that the searching procedure via HyperOpt is not a global searching, which will lead to different optimizing results.

By passing the optimal random state and test size, we could easily obtain the divided training and test sets. We also prepared our data files that were generated under the random state of 1959 and test size of 18.05% which were named as “./code3/train\_1805\_1959.joblib” and “./code3/test\_1805\_1959.joblib” in the supporting files.

```

from fml.data import read_data
from fml.preprocessing import Preprocessing
from fml.sampling import HpSplit, random_split

# Load the generated data set composed of 437 samples × 129 features
dataset = read_data("../code2//H0IP_dataset_437.xlsx", df=False)
print(f"Feature numbers: {dataset.X.shape[1]}")
# Prune the variables that have missing values or low standard deviations
# nearly to zero, bringing about 102 remnant features left
preprocessed_dataset = Preprocessing(sd=True, corr=False).fit_transform(dataset)
print(f"Feature numbers: {preprocessed_dataset.X.shape[1]}")

# Use module HpSplit to optimize random state and test size in pursuit a suitable
# sample distribution of training and test sets
# "rounds" is set as 200 to perform 200 iterations
# verbose is set as True to print the log information
# Pass dataset variable as the first argument of "fit" function
# cv is set as True which means leaving one out cross validation (LOOCV)
# cv could also be set as an int number which refers to number-fold CV
# The root mean squared error (RMSE) of LOO is used as the optimizing fitness
hs = HpSplit(rounds=200, verbose=True).fit(dataset, cv=True)
# the parameters are saved in "best_params", and summary stores the log information
best_params, summary = hs.best_params, hs.summary
print(f"Random state: {best_params['random_state']}")
print(f"test size: {best_params['test_size']}")

# Use the best parameters from the HpSplit result to split the data
train, test = random_split(dataset, best_params['test_size'],
                           best_params['random_state'])

# Output the train and test
import joblib
joblib.dump(train, "train.joblib")
joblib.dump(test, "test.joblib")

# If you want see the data, use "to_df()" to transform to dataframe
train = train.to_df()
test = test.to_df()

```

Figure S3 The code to split data set into training and test sets

## Code S4 Feature Selection

As shown in Figure S4, the training and test sets were loaded from the output files in **Code S3**. The recursive feature addition (RFA) method was performed by importing the inhouse module "fml.pipelines.RFA", which takes training and test sets as main parameters. The optional parameters "min\_f" and "max\_f" control the minimum and maximum feature numbers in RFA procedure. The RFA approach will fit the models by recursively iterating both of the selected features and the employed 7 algorithms, in which selected features is ranked according to the feature importance extracted from SHAP package<sup>17</sup> and maximum relevance minimum redundancy (mRMR) method<sup>18</sup>, and the algorithms cover CatBoost (CAT)<sup>19</sup>, XGBoost (XGB)<sup>20</sup>, LightGBM (LGB)<sup>21</sup>, gradient boosting machine (GBM)<sup>22</sup>, support vector machine (SVM)<sup>23</sup>, decision tree regressor (DTR)<sup>24</sup>, and multiple linear regressor (MLR)<sup>14</sup>. The processed result could be accessed in the variable "summary" in the pandas.DataFrame format, which is outputted as an excel file "./code4/RFA\_result.xlsx".

The various model performance could be seen in Figure S5 ~ Figure S8. The model performance was mainly determined based on the LOOCV RMSEs of the 7 models. By comparing the integral LOOCV RMSEs trend between in the Figure S5 (a) and (b), the over performance of the tree-based models was largely greater than the other models. The LOOCV RMSEs of tree-based models were fixed in 0.08 ~ 0.12 after 13 features while the range of the latter were almost over 0.14. The same result could be drawn from the LOOCV determination coefficient ( $R^2$ ) trend in Figure S6, in which the LOOCV  $R^2$  values of the tree-based models were almost over 0.90. Figure

S7 (a) and Figure S8 (b) signaled the powerful predictivities of the tree-based models with the test RMSEs ranging 0.10 ~ 0.14 and the test  $R^2$  values higher 0.85, indicating that the models were fitted well and avoided the over-fitting problems. Finally, the CAT, XGB, LGB, and GBT models were built up based on the top 13, 13, 12, and 10 features respectively, whose LOOCV  $R^2$  were 0.94, 0.92, 0.90, and 0.93 respectively.

Figure S5 ~ Figure S8 could be generated by the file “./code4/code4\_plot.py”.

```

from fml.pipelines import RFA
import joblib

# Load the training and test sets from the step Code3
train = joblib.load("../code3//train_1805_1959.joblib")
test = joblib.load("../code3//test_1805_1959.joblib")

# Use our inhouse module RFA to perform feature selection
# Pass the training and test sets
# min_f and max_f refer to minimum and maximum feature numbers
rfa = RFA().fit_all(train, test, min_f=3, max_f=21)
# The results could be accessed in a dataframe "summary"
summary = rfa.summary_all
# Output the dataframe to an excel file if needed
summary.to_excel("RFA_result.xlsx", index=None)

```

Figure S4 The code to perform RFA feature selection combining with 7 algorithms.

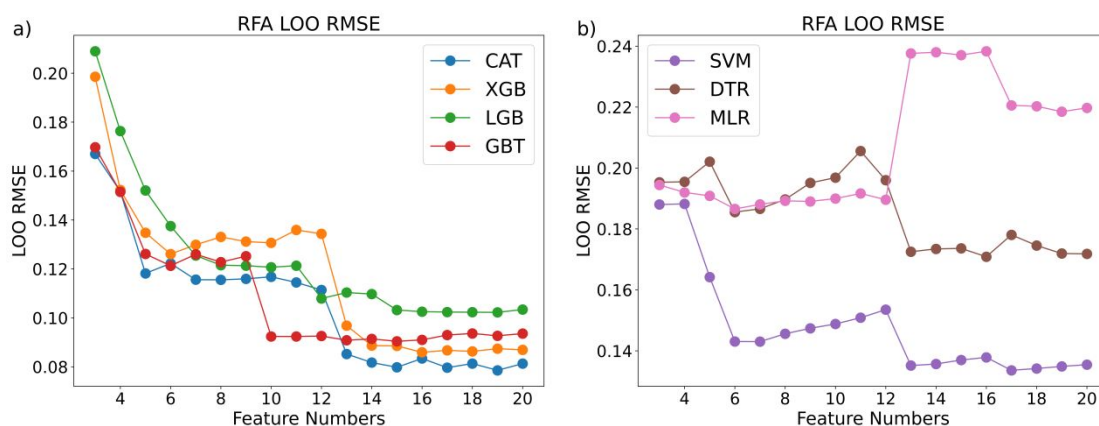

Figure S5 The changing trend of LOO RMSEs of the tree-based (a) and other (b) models along with the increasing number.

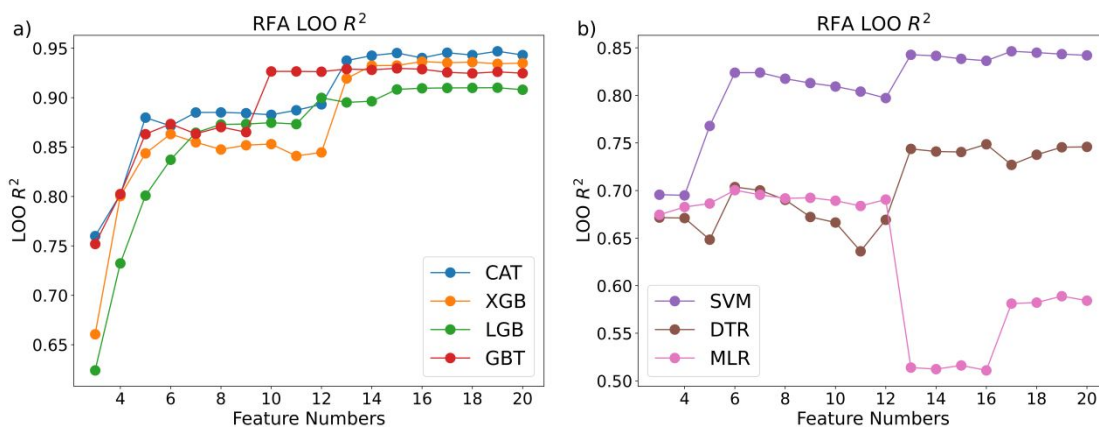

Figure S6 The changing trend of LOO  $R^2$  of the tree-based (a) and other (b) models along with the increasing number.

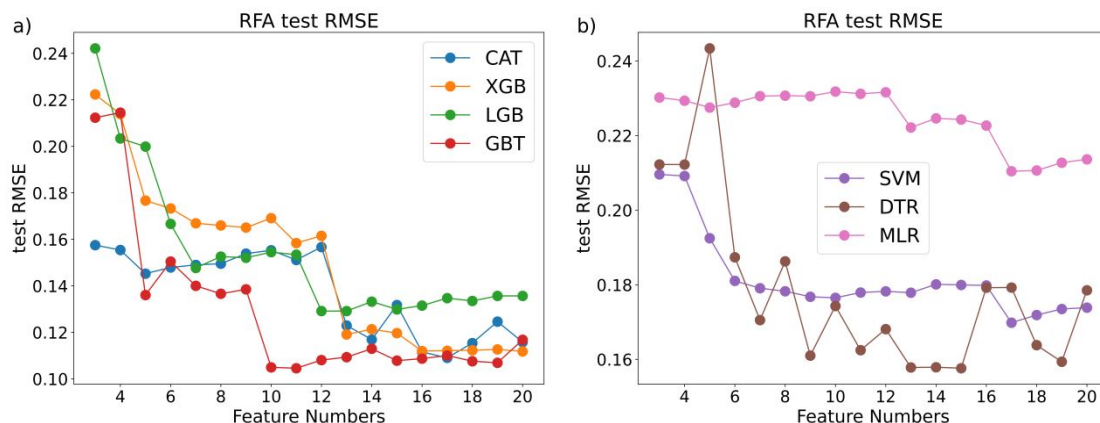

Figure S7 The changing trend of test set RMSEs of the tree-based (a) and other (b) models along with the increasing number.

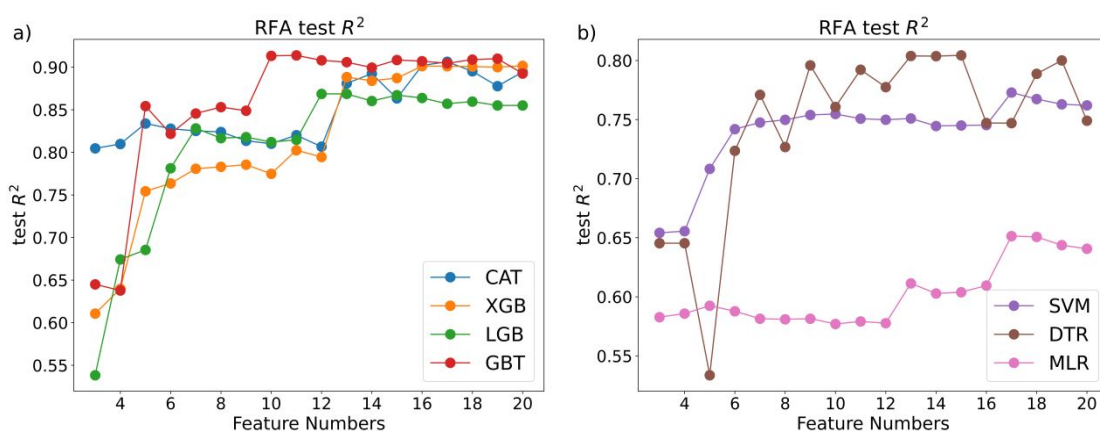

Figure S8 The changing trend of test set  $R^2$  of the tree-based (a) and other (b) models along with the increasing number.

## Code S5 SHAP Analysis

The feature contributions of each established model were calculated using SHAP package.<sup>17</sup> As shown in Figure S9, the training and test set loaded from **Code S3** were passed to module “fml.pipelines.SHAPModelling” to obtain the filtered training and test set for each algorithm along with the selected feature number determined in **Code S4**, namely 13, 13, 12, and 10 for CAT, XGB, LGB, and GBT models respectively. Then the SHAP values would be calculated based on the filtered respective training and test set for each model. The extracted feature contributions could be seen in Figure S10.

```

from fml.pipelines import SHAPModelling
from fml.feature_selection import Shap
import joblib
import matplotlib.pyplot as plt
plt.rcParams["figure.dpi"] = 600

from xgboost import XGBRegressor as XGB
from catboost import CatBoostRegressor as CAT
from lightgbm import LGBMRegressor as LGB
from sklearn.ensemble import GradientBoostingRegressor as GBT

# Load the training and test sets from the step Code3
train = joblib.load("../code3//train_1805_1959.joblib")
test = joblib.load("../code3//test_1805_1959.joblib")

# Define the feature numbers resulted from Code4
feature_numbers = {
    CAT: 13,
    XGB: 13,
    LGB: 12,
    GBT: 10,
}

# Define the model abbreviations
abbrs = {
    CAT: "CAT",
    XGB: "XGB",
    LGB: "LGB",
    GBT: "GBT",
}

# Iterate 4 models
for algo in [CAT, XGB, LGB, GBT]:
    # Transform the original training and test sets with the pre-defined optimal feature numbers
    train_, test_ = SHAPModelling().fit(algo, train.copy(), test.copy()).transform(feature_numbers[algo])
    # Use fml.Shap module to perform SHAP calculations automatically
    explainer = Shap().fit(algo, train_)
    # Plot the SHAP importance
    explainer.bar(max_display=20, xlabel=f"{abbrs[algo]} SHAP Values")

```

Figure S9 The code to calculate SHAP values for the fitted tree-based models.

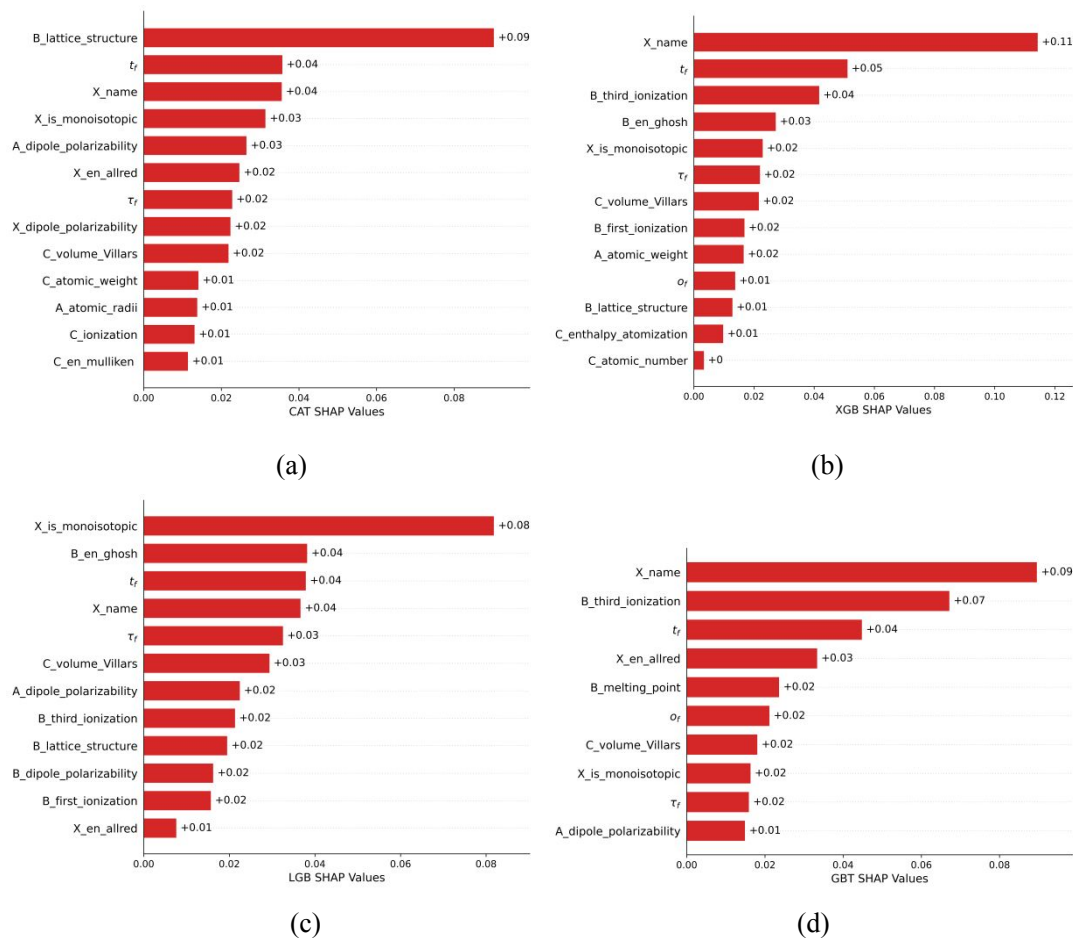

Figure S10 SHAP values of CAT (a), XGB (b), LGB (c), GBT (d) models.

## Code S6 Hyper-parameter Optimization

The hyper-parameters were optimized for CAT, XGB, LGB, GBT models. The grid search (GS) module from scikit-learn<sup>14</sup> may lack of more detailed processing information and not perform so efficiently in parallel calculations. Thence we used the self-developed module “fml.parameter\_opt.GridSearch” to perform GS approach.

Herein, we consider the tree number, learning rate and tree depth for the optimization. As shown in Figure S11, the training and test set were loaded from **Code 3**, and the feature number were extracted from **Code 4**. The filtered training and test set were obtained from the module “fml.pipelines.SHAPModelling”, which was the same as **Code S5**. Then the grid search were performed using the module “fml.parameter\_opt.GridSearch” along with the pre-defined algorithm (XGB in Figure S11), training set, test set, and the parameter ranges loaded from module “fml.configs.auto\_config.gridsearch\_parameters\_reg”. We set the range 0.05~1 with step 0.05 for learning rate in XGB, LGB, GBT algorithms, while the learning rate will be automatically calculated in CAT algorithm according to the tree number value. The tree number (n\_estimators) was set as 50~350 with step 10 for XGB, LGB, GBT algorithms, while 50~600 with step 50 for CAT algorithm. The tree depth (max\_depth) was set as 3~8 with step 1 for XGB, LGB, GBT algorithms, while 4~10 with step 1 for CAT algorithm. Then the GS procedure would be running for hours depending on the computers. The full GS results could be accessed in “results”, while the best parameters could be seen in “best\_p”. The results were outputted into table file and “./code6/\*.joblib” file.

The model performance along with the best hyper-parameters were listed in Table S5. LOOCV  $R^2$  of the CAT, XGB, LGB, GBT models were 0.928~0.950, while LOOCV RMSEs were 0.076~0.091, indicating the robust model performance. The corresponding test  $R^2$  and test RMSEs were 0.883~0.918 and 0.102~0.122 respectively, showing the good predictivities. Also, we performed 5-folds cross-validation (CV5) and 10-folds cross-validation (CV10) for the models, whose  $R^2$  were all over 0.90, which proved the models were trained well.

```

from fml.pipelines import SHAPModelling
from fml.parameter_opt import GridSearch
from fml.configs.auto_config import gridsearch_parameters_reg
import joblib

from xgboost import XGBRegressor as XGB
from catboost import CatBoostRegressor as CAT
from lightgbm import LGBMRegressor as LGB
from sklearn.ensemble import GradientBoostingRegressor as GBT

algorithm = XGB

# Load the training and test sets from the step Code3
train = joblib.load("../code3//train_1805_1959.joblib")
test = joblib.load("../code3//test_1805_1959.joblib")

# Define the feature numbers resulted from Code4
feature_numbers = {
    CAT: 13,
    XGB: 13,
    LGB: 12,
    GBT: 10,
}

# Define the model abbreviations
abbrs = {
    CAT: "CAT",
    XGB: "XGB",
    LGB: "LGB",
    GBT: "GBT",
}

# Transform the original training and test sets
# with the pre-defined optimal feature numbers
train_, test_ = SHAPModelling().fit(
    algorithm, train, test
).transform(feature_numbers[algorithm])

# Perform grid search (GS) approach
grid_p = gridsearch_parameters_reg[algorithm]
gs = GridSearch(n_jobs=10).fit(
    algorithm, train_, test_, cv=True, **grid_p
)

# GS results are exhibited as a table format
results = gs.results
# Obtain the best parameters and the best result
best_p = gs.best_p
best_result = gs.best_result
# Output the GS results into a table
results.to_excel(f"{algorithm}_gs_results.xlsx")

import joblib
joblib.dump(gs, f"gs_{algorithm}.joblib")

```

Figure S11 The code to optimize the hyper-parameters for the CAT, XGB, LGB, GBT models.

```

gridsearch_parameters_reg = {
    XGBRegressor: {
        "learning_rate": linspace(0.05, 1, 0.05),
        "n_estimators": linspace(50, 350, 10, dtype=int),
        "max_depth": linspace(3, 8, 1, dtype=int),
        "n_jobs": [1]
    },
    GradientBoostingRegressor: {
        "learning_rate": linspace(0.05, 1, 0.05),
        "n_estimators": linspace(50, 350, 10, dtype=int),
        "max_depth": linspace(3, 8, 1, dtype=int)
    },
    LGBMRegressor: {
        "learning_rate": linspace(0.05, 1, 0.05),
        "n_estimators": linspace(50, 350, 10, dtype=int),
        "max_depth": linspace(3, 8, 1, dtype=int),
    },
    CatBoostRegressor: {
        "max_depth": linspace(4, 10, 1, dtype=int),
        "n_estimators": linspace(50, 600, 50, dtype=int),
        "verbose": [False],
        "thread_count": [1]
    }
}

```

Figure S12 Ranges of the hyper-parameters for CAT, XGB, LGB, and CAT algorithms.

Table S5 Model performance of CAT, XGB, GBT, LGB models. The validation methods involve training validation, leaving-one-out cross-validation (LOOCV), 5-folds cross-validation (CV5), 10-folds cross-validation (CV10), and test validation. The metrics involves determination coefficient ( $R^2$ ), Pearson correlation coefficient ( $\rho$ ), root mean squared error (RMSE), mean average error (MAE), and



mean squared error (MSE).

|                |        | CAT   | XGB   | LGB   | GBT   |
|----------------|--------|-------|-------|-------|-------|
| Tree number    |        | 600   | 50    | 350   | 80    |
| Learning rate  |        | 0.048 | 0.3   | 0.15  | 0.25  |
| Tree depth     |        | 7     | 5     | 5     | 4     |
| Feature number |        | 13    | 13    | 12    | 10    |
| Training       | $R^2$  | 0.994 | 0.998 | 0.992 | 0.999 |
|                | $\rho$ | 0.997 | 0.999 | 0.996 | 0.999 |
|                | RMSE   | 0.025 | 0.017 | 0.031 | 0.013 |
|                | MAE    | 0.018 | 0.012 | 0.020 | 0.010 |
|                | MSE    | 0.001 | 0.000 | 0.001 | 0.000 |
| LOOCV          | $R^2$  | 0.950 | 0.934 | 0.932 | 0.928 |
|                | $\rho$ | 0.976 | 0.966 | 0.966 | 0.963 |
|                | RMSE   | 0.076 | 0.088 | 0.089 | 0.091 |
|                | MAE    | 0.048 | 0.058 | 0.057 | 0.060 |
|                | MSE    | 0.006 | 0.008 | 0.008 | 0.008 |
| CV5            | $R^2$  | 0.946 | 0.905 | 0.904 | 0.904 |
|                | $\rho$ | 0.974 | 0.952 | 0.951 | 0.951 |
|                | RMSE   | 0.079 | 0.105 | 0.106 | 0.106 |
|                | MAE    | 0.051 | 0.066 | 0.067 | 0.066 |
|                | MSE    | 0.006 | 0.011 | 0.011 | 0.011 |
| CV10           | $R^2$  | 0.936 | 0.920 | 0.920 | 0.903 |
|                | $\rho$ | 0.968 | 0.959 | 0.960 | 0.951 |
|                | RMSE   | 0.086 | 0.096 | 0.096 | 0.106 |
|                | MAE    | 0.053 | 0.063 | 0.061 | 0.068 |
|                | MSE    | 0.007 | 0.009 | 0.009 | 0.011 |
| Test           | $R^2$  | 0.906 | 0.894 | 0.883 | 0.918 |
|                | $\rho$ | 0.954 | 0.946 | 0.940 | 0.959 |
|                | RMSE   | 0.109 | 0.116 | 0.122 | 0.102 |
|                | MAE    | 0.054 | 0.068 | 0.069 | 0.059 |
|                | MSE    | 0.012 | 0.013 | 0.015 | 0.010 |
| External Set   | $R^2$  | 0.790 | 0.800 | 0.740 | 0.800 |
|                | $\rho$ | 0.894 | 0.902 | 0.870 | 0.903 |
|                | RMSE   | 0.068 | 0.066 | 0.076 | 0.066 |
|                | MAE    | 0.040 | 0.045 | 0.044 | 0.047 |
|                | MSE    | 0.005 | 0.004 | 0.006 | 0.004 |

## Code S7 Weighted Voting Regressor

Inspired by the voting regressor (VR) in scikit-learn<sup>14</sup>, we developed a weighted voting regressor (WVR) that combines various machine learning regression models and return the weighted predicted values. There are two main differences between the self-developed voting

regressor and the one of scikit-learn: i) the former combines the predictions of the sub-models by weights, while VR directly returns the average value; ii) the sub-models in WVR could use the individual feature set while the sub-models in VR use the same feature set. The utilization could be seen in Figure S13. The first part was to load the data set and the grid search results from the previous code part. Before fitting the WVR model, we needed to prepare 4 augments. The first was the variable containing algorithm modules that would be trained as sub-models. The second and third variables involved the training sets and test sets. The last one contained the model hyper-parameters that extracted from **Code S6**. An example form for the 4 augments was given in Figure S14. After fitting a WVR model, the best weights among the sub-models would be searched by using HyperOpt tool<sup>16</sup>. The search result might be different since HyperOpt does not perform a global search. In our case, a set of weights (Table S6) were outputted with 0.38 for CAT, 0.05 for XGB, 0.05 for LGB, and 0.51 for GBT model. The LOOCV  $R^2$  and test  $R^2$  reached 0.95 and 0.91 respectively, while the corresponding RMSEs were 0.079 and 0.106 respectively. The WVR model comprehended the outputs from the 4 sub-models, which has a more compliment model performance. The WVR model was outputted in “./code7/vr.joblib”.

The WVR model was also validated by predicting the bandgaps of external samples set of 42 HOIPs. The validating result could be seen in Table S7 and the code could be found in “./code7/code7\_validating\_48samples\_2021.py”.

```

from fml.pipelines import SHAPModelling
from fml.ensemble import VotingRegressor
import joblib, glob

from xgboost import XGBRegressor as XGB
from catboost import CatBoostRegressor as CAT
from lightgbm import LGBMRegressor as LGB
from sklearn.ensemble import GradientBoostingRegressor as GBT

# Load the training and test sets from the step Code3
train = joblib.load("../code3/train_1805_1959.joblib")
test = joblib.load("../code3/test_1805_1959.joblib")

# Define the feature numbers resulted from Code4
feature_numbers = {
    CAT: 13,
    XGB: 13,
    LGB: 12,
    GBT: 10,
}

# Define the model abbreviations
abbrs = {
    CAT: "CAT",
    XGB: "XGB",
    LGB: "LGB",
    GBT: "GBT",
}

# Obtain the best parameters from code 6
best_parameters = { i.split("_")[1].split(".")[0]:joblib.load(i).best_p \
                    for i in glob.glob("../code6/*.joblib")}
best_parameters = { i:best_parameters[j] for i, j in abbrs.items() }

# Organize the algorithms, trains, tests, model parameters
trains, tests, model_ps, algos = [], [], [], []
for algorithm in [CAT, XGB, LGB, GBT]:
    train_, test_ = SHAPModelling().fit(
        algorithm, train.copy(), test.copy()
    ).transform(feature_numbers[algorithm])
    trains.append(train_)
    tests.append(test_)
    model_ps.append(best_parameters[algorithm])
    algos.append(algorithm)

# Fit the VotingRegressor
vr = VotingRegressor(verbose=True, rounds=100)
vr.fit(algos, trains, tests, model_ps)
# Get the results from vr object
results = vr.results
# Best weights
best_w = vr.best_weights
# Save the vr object
joblib.dump(vr, "vr.joblib")

```

Figure S13 The code to fit a voting regressor

```

algos = [CAT, XGB, LGB, GBT]
trains = [train_cat, train_xgb, train_lgb, train_gbt]
tests = [test_cat, test_xgb, test_lgb, test_gbt]
model_ps = [
    {'learning_rate': 0.03,
     'n_estimators': 800,
     'max_depth': 8,
     'verbose': False,
     'thread_count': 1},
    {'n_estimators': 50, 'learning_rate': 0.3, 'max_depth': 5, 'n_jobs': 1},
    {'learning_rate': 0.15000000000000002, 'n_estimators': 350, 'max_depth': 5},
    {'learning_rate': 0.25, 'n_estimators': 80, 'max_depth': 4}]

```

Figure S14 Example augments for fitting a weighted voting regressor

Table S6 Weights in weighted voting regressor.

|    | CAT      | XGB       | LGB       | GBT      |
|----|----------|-----------|-----------|----------|
| 权重 | 0.381301 | 0.0520176 | 0.0520183 | 0.514664 |

Table S7 Validating result for the external data set of 42 HOIPs.

| VWR    | Training | LOO   | Test  | CV5   | CV10  | External validating set of 42 HOIPs |
|--------|----------|-------|-------|-------|-------|-------------------------------------|
| $R^2$  | 0.997    | 0.946 | 0.912 | 0.939 | 0.937 | 0.837                               |
| $\rho$ | 0.999    | 0.973 | 0.956 | 0.970 | 0.969 | 0.919                               |
| RMSE   | 0.017    | 0.079 | 0.106 | 0.084 | 0.086 | 0.060                               |
| MAE    | 0.012    | 0.052 | 0.056 | 0.056 | 0.056 | 0.041                               |
| MSE    | 0.000    | 0.006 | 0.011 | 0.007 | 0.007 | 0.004                               |

## Code S8 SHAP Analysis for Weighted Voting Regressor

To perform the SHAP analysis based on WVR model, we built up a module “fml.ensemble.VotingShap” to overcome the incompatibility between WVR model and SHAP package. The SHAP values for experimental and virtual data set were calculated for various SHAP analysis, as seen in Figure S15 and Figure S16. The virtual data set was generated via the module “fml.searching.HOIPWithVotingRegressor” in Figure S17, whose chemical formular was defined as  $A'_x A''_{1-x} B'_y B''_{1-y} C'_z C''_{3-z}$ . As shown in Table S8, the elements in red color were chosen to supplement the virtual data set.

As for the calculating code, the procedures for both data set were almost the same except for the data set. Firstly, the WVR model was read as the “voting\_model”. The “VotingShap” was fitted by passing the WVR model and the data set. The user could use the fitted “VotingShap” objects and the generated virtual data set. However, because of the large file size, these files were only supplied on our Github page (<https://github.com/luktian/InverseDesignViaPSP>). After fitting the “VotingShap” model, the SHAP values could read from the property “shap\_values”. Then various SHAP plots could be drawn directly, which could be seen in Figure S19~

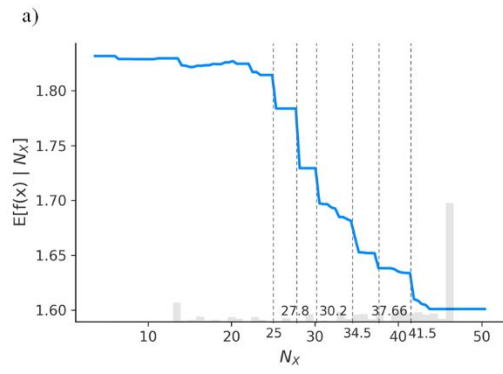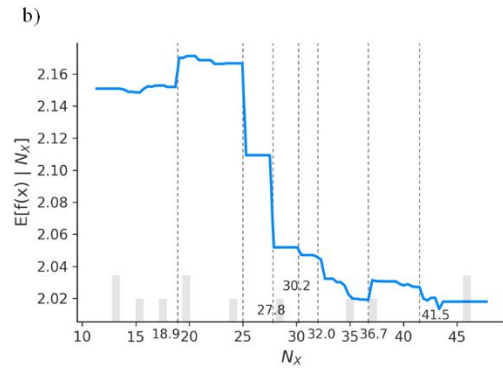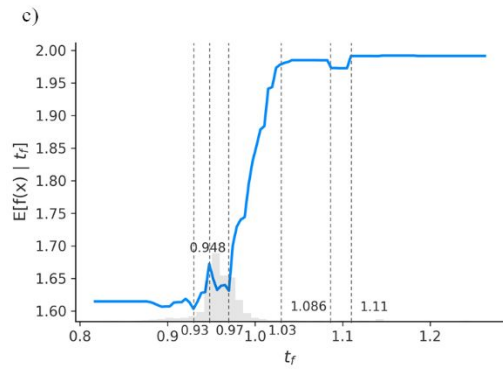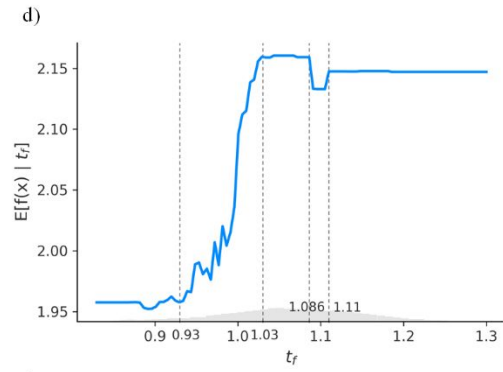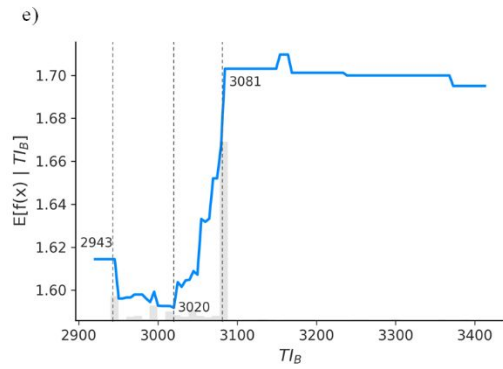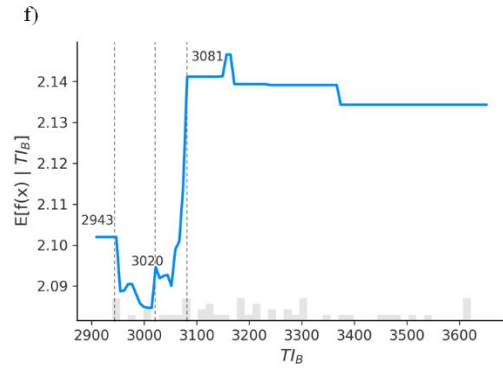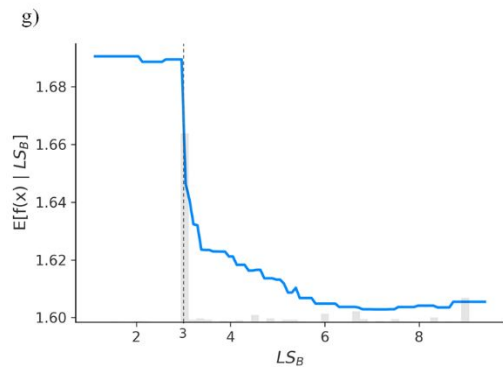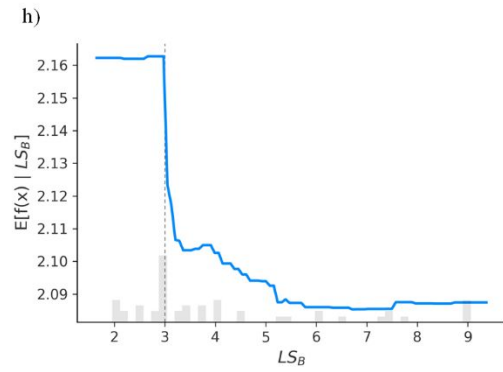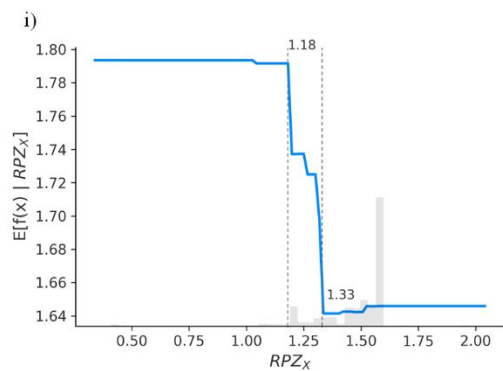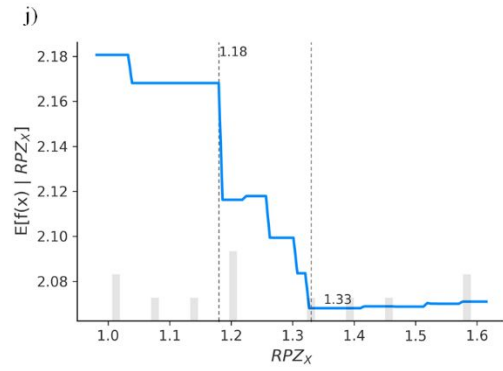

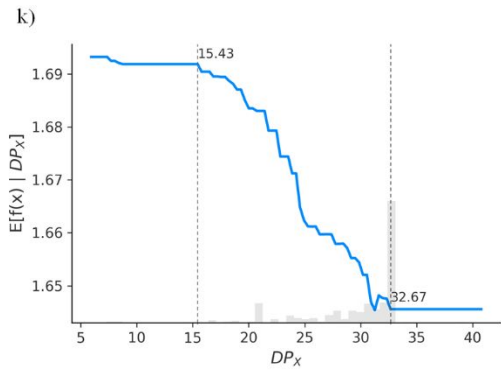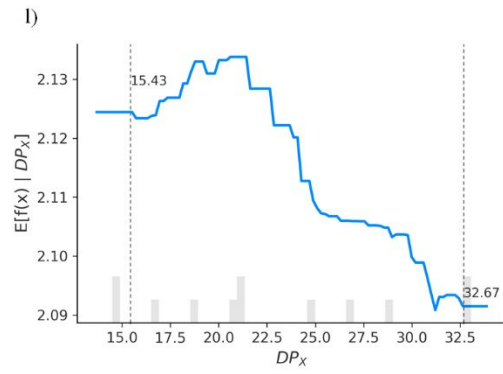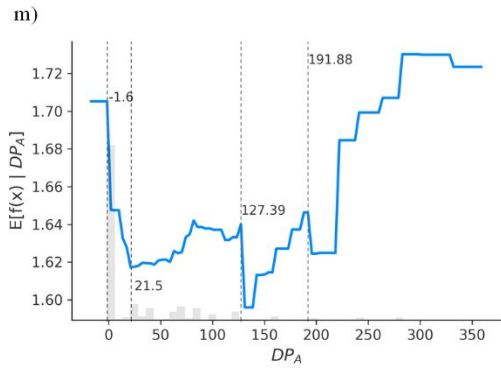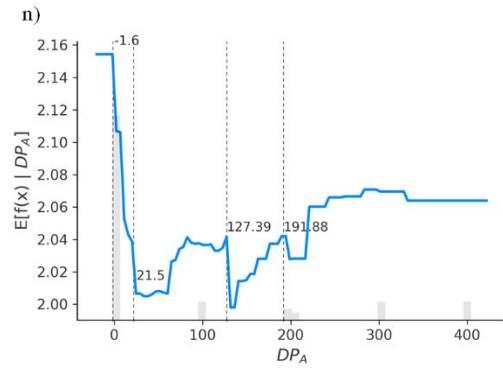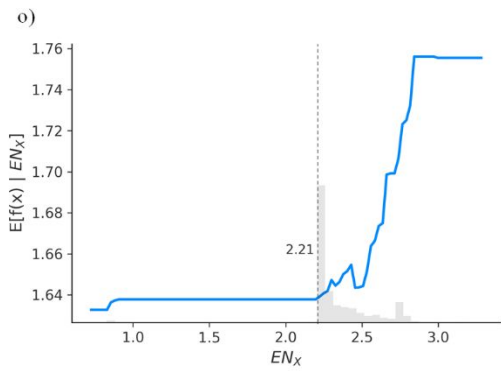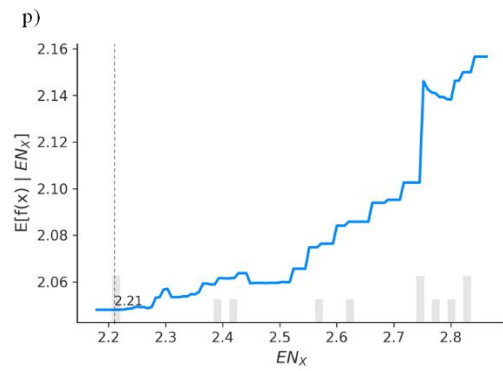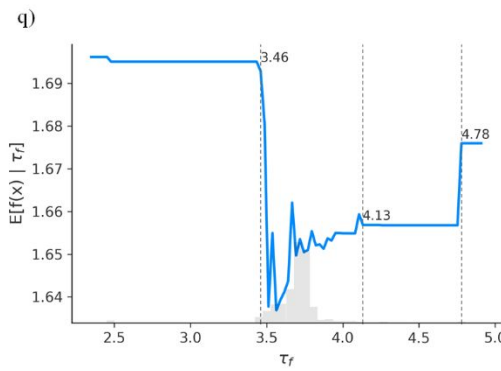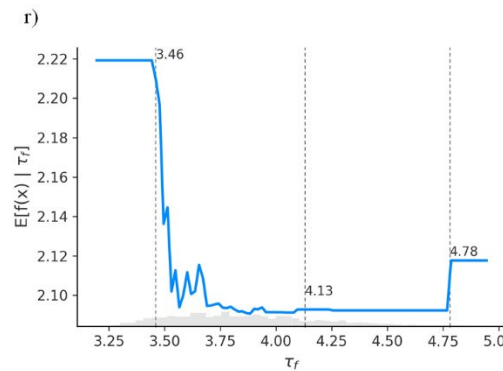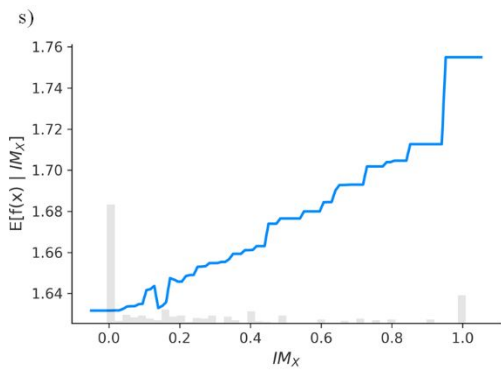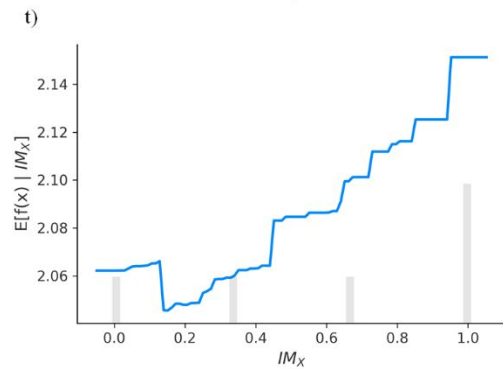

Figure S21.

### Feature Analysis in Detail

Figure S18 (a) and (b) exhibited the top 10 features ranked by their contributions extracted from SHAP values in experimental and virtual data sets, whose vertical axis comprised feature ranking, and horizontal axis was the SHAP values for the features. The top 10 features in both data sets were identically the same, regardless of their ordering sequences. Specifically, the descriptors  $N_X$  (representing element name in X site) and  $t_f$  were the top 2 features in both of data set. The descriptors related to B site also had the important contributions to bandgap in experimental data set, which took the 3rd and 4th positions, followed by the descriptors related to A and X sites. Meanwhile in virtual data set, the B site descriptors were ranked at 9th and 10th, whose contributions were slightly lower than the descriptors in A and X sites.

Figure S18 (c) and (d) displayed the distributions of SHAP values of features for experimental and virtual data sets, where the horizontal axis comprised the sorted sample indexes according to model predictions that were presented in the top panel with their mean values (1.68 eV for experimental data set and 2.12 eV for the virtual one) signaled by the dotted line in gray color. The red/blue color expressed the positive/negative SHAP values for each sample and feature, which furtherly indicated the positive/negative contributions to predictions. The positive SHAP values for each feature (in red color) were mainly localized in the left part that corresponds to the higher bandgaps in both of the data sets, while the negative values (in blue color) were located at the right part related to the lower predictions, thus resulting a separately isolated distributions of positive/negative SHAP values for both data sets.

The scatter plots between features and SHAP values were drawn in Figure S19 with the color indicating prediction value to acquire a further understanding of each feature. Individual conditional expectation (ICE)<sup>25</sup> plots for each feature were drawn in Figure S20. ICE plots could signify the marginal effect that the feature had on the prediction, and revealed how the prediction of one sample (one line per sample) changed as the feature value increased. The partial dependence (PD)<sup>26</sup> plot was the average case that focused on the overall margin effect of the feature, which was drawn in Figure S21.

Starting from  $N_X$ , as shown in Figure S19 (a) and (b), the SHAP values for  $N_X$  had the decreasing trend in both data sets as the  $N_X$  values were increasing. The samples with lower  $N_X$  values and thence corresponding higher SHAP values tended to express the larger bandgaps (in darker red color) and the vice versa. By marking an inflection point (determining the SHAP values positive or negative) 34.72 of  $N_X$  in experimental data set, the  $N_X$  values over 34.72 would result in the negative SHAP values, and the ones lower than 34.72 led to the positive, while the inflection point in virtual data set was adapted to 26.33. The original values of  $N_X$  have been converted to numbers in the procedure of generating descriptors, in which chlorine, bromine and iodine were signaled by 20, 13, and 46 respectively. Hence, in pursuit of a higher/lower bandgap, the ratio of iodine in X site should be decreased/increased for a low/high  $N_X$  value that would trigger a high/low SHAP value, which was consistent to the current domain knowledges.<sup>27</sup>

As indicated by the ICE and PD plots for  $N_X$  in Figure S21 (a ~ b) and Figure S22 (a ~ b), the same conclusion was extracted that the bandgap decreased as the  $N_X$  value increased. Besides, the steep points that triggered sharp decreases in predictions were labelled out for both of two data sets, whose locations were 25.00, 27.80, 30.20, 34.50, 37.66, 41.50 for experimental data set and 18.90, 25.00, 27.80, 30.20, 32.00, 36.70, 41.50 for virtual data set respectively. Four points of 25.00, 27.80,

30.20 and 41.50 were the same for both data sets, in which the steep point 25.00 for  $N_X$  might refer to the doped couple  $\text{Br}_{1.915}\text{I}_{1.091}$  or  $\text{Cl}_{2.423}\text{I}_{0.577}$ , and 27.80 to  $\text{Br}_{1.655}\text{I}_{1.345}$  or  $\text{Cl}_{2.100}\text{I}_{0.900}$ , 30.20 to  $\text{Br}_{1.455}\text{I}_{1.545}$  or  $\text{Cl}_{1.846}\text{I}_{1.154}$ , 41.50 to  $\text{Br}_{0.409}\text{I}_{2.591}$  or  $\text{Cl}_{0.519}\text{I}_{2.481}$ . As the ratios of iodine in these couples increased, their bandgap values were expected to receive steep decreases.

There were 4 other X-site-related descriptors that largely contributed to model predictions.  $RPZ_X$  was the element (in X site) radii defined by Zunger *et al.*<sup>28</sup>, in which the radius of chlorine, bromine, and iodine were 1.01, 1.2, and 1.585 a.u. respectively.  $IM_X$  determined whether an element in X site had only a single stable isotope, whose values were defined 0 for iodine and 1 for chlorine/bromine.  $EN_X$  was the electronegativity defined by Allred *et al.*<sup>29</sup>, in which electronegativities of chlorine, bromine, and iodine were 2.83, 2.74, and 2.21 respectively.  $DP_X$  represented the dipole polarizability of the element in X site, whose values were 14.60, 21.00, and 32.90 a.u. respectively. Presented by the scatter plots in Figure S19 (i, j, k, l, o, p, s, t), the higher/lower values of  $IM_X$ , and  $EN_X$  indicated the higher/lower proportions of chlorine/bromine and the higher/lower bandgap predictions, while the cases of  $RPZ_X$  and  $DP_X$  was the vice versa. The ICE and PD plots for the features in Figure S20 (i, j, k, l, o, p, s, t) and Figure S21 (i, j, k, l, o, p, s, t) also unveiled that the feature values of  $IM_X$ , and  $EN_X$  were proportional to the bandgap prediction while the values of the other X-related features were the reverse. Particularly, the  $RPZ_X$  range in 1.18 ~ 1.33 a.u. resulted in a steep decrease while the range over/lower than 1.88/1.33 a.u. led to unshaking tendencies. The inflection point of 1.18 a.u. might refer to the doped couple  $\text{Cl}_{0.330}\text{Br}_{2.670}$  or  $\text{Cl}_{2.130}\text{I}_{0.870}$ , and the point 1.33 a.u. might refer to  $\text{Br}_{1.980}\text{I}_{1.020}$  or  $\text{Cl}_{1.350}\text{I}_{1.650}$ . As the  $EN_X$  value was less than 2.21 that represented the electronegativity of iodine, the corresponding bandgap prediction was nearly unchanged, while the prediction started to augment after 2.21. The  $DP_X$  values in 15.43 ~ 32.67 a.u. would cause a sharp decrease of the bandgap, while the range over/lower than 32.67/15.43 a.u. led to the steady change. Herein the points signaled to the couples of  $\text{Cl}_{2.610}\text{Br}_{0.390}$ ,  $\text{Cl}_{2.580}\text{I}_{0.150}$ ,  $\text{Br}_{0.060}\text{I}_{2.940}$ , or  $\text{Cl}_{0.030}\text{I}_{2.970}$ .

$TI_B$  signaled the third ionization energy of the element in B site, in which the energies of tin, lead, germanium, cadmium, and palladium were 2943, 3081, 3302, 3616, and 3177 kJ/mol respectively.  $LS_B$  stood for the lattice crystal structure of the simple substance for the elements in B site, whose values were tetragonal (TET, encoded as 9) for tin, face-centered cubic (FCC, encoded as 3) for lead/cadmium/palladium, and diamond cubic (DIA, encoded as 2) for germanium. Indicated by the scatter plots in Figure S19 (e, f, g, h) for the features, the  $TI_B$  value was proportional to its SHAP value and bandgap prediction in both of data sets, while the  $LS_B$  was the reverse situation. Combining the relevant ICE and PD plots of  $TI_B$  in Figure S20 (e, f, g, h) and Figure S21 (e, f, g, h), it could be noted that the steep point 2943 and 3081 kJ/mol were the third ionizations of tin and lead, which revealed the overall increasing trending of the bandgap as the proportion of lead arose in the doped B site couple SnPb. When the  $TI_B$  value was over 3081, the prediction was nearly unchanged and even slightly declined, indicating that the higher ratios of germanium/cadmium/palladium might have little influence on bandgap. The point of 3 in the ICE and PD plots of  $LS_B$  signaled the existence of lead/cadmium/palladium. The rising  $LS_B$  value represented the increasing proportion of tin, which further rendered the lower model prediction.

$DP_A$  was the dipole polarizability of the element in A site, whose values were 400.90 a.u. for caesium (Cs), 289.70 a.u. for potassium, 1.07 a.u. for FA, 0.51 a.u. for MA, 1.13 a.u. for GA, 0.52 a.u. for EA, and 0 a.u. for ED. Because of the much smaller dipole polarizability of organic fragments, lots of samples with pure organic components in A site were concentrated around the

feature value of 0, whose SHAP values mingled either positive or negative. The positive ones might refer to the samples containing, *e.g.*, GA/EA/ED, whose bandgaps were much larger than [MA]BX<sub>3</sub> or [FA]BX<sub>3</sub>, such as EA<sub>0.25-1</sub>MA<sub>0.75-0</sub>PbBr<sub>3</sub> (2.56 ~ 2.94 eV versus 2.30 eV of MAPbBr<sub>3</sub>) and ED<sub>0.1-0.5</sub>MA<sub>0.9-0.5</sub>PbI<sub>3</sub> (1.58 ~ 2.10 eV versus 1.50 eV of MAPbI<sub>3</sub>), while the negative samples might refer to the ordinary MAPbX<sub>3</sub> or FAPbX<sub>3</sub> (X referred to chlorine, bromine and iodine). As the additions of inorganic elements into MAPbX<sub>3</sub> or FAPbX<sub>3</sub>, the SHAP value had a sluggish growing trend toward 0, which revealed that the higher ratio of inorganic elements was contributed to the higher bandgap.

As shown in Figure S19 (c), the SHAP values of  $t_f$  had an overall increasing trend with the ascendent  $t_f$  values, whose inflection point was 0.971 in experimental data set. In the case of virtual data set in Figure S19 (d), the  $t_f$  could be divided into three ranges. The SHAP values for  $t_f$  in the range 0.850~0.861 were mostly negative contributing to the lower bandgap, while the majority of SHAP values for  $t_f$  in 0.861~1.014 were negative and the ones in 1.014~1.277 were almost positive. Thence, for the purpose of higher/lower bandgaps, the  $t_f$  values should be controlled higher/lower than 1.014. Revealed by the ICE plots for  $t_f$  in Figure S20 (c, d), the predictions of each sample were shrinking from the range 1.21 ~ 2.95 eV to the range 1.76 ~ 2.75 eV. The PD plots in Figure S21 (c, d) displayed sigmoid-like function trends in experimental and virtual data sets, in which the  $t_f$  range below/above than 0.930/1.086 indicated steady prediction changes, and the data in the range of 0.930 ~ 1.086 resulted in a steep increment for bandgap values. From the scatter plots of  $t_f$  in Figure S19 (q, r), the inflection points 3.50 and 4.78 could be noticed in both of data sets. The SHAP values were mostly positive as the  $\tau_f$  value was lower than 3.50 or higher than 4.78, while the values become negative as the  $\tau_f$  value was in 3.50 ~ 4.78. The ICE plots in Figure S20 (q, r) for  $\tau_f$  expressed that the prediction ranges were shrinking from 1.22 ~ 3.15 to 1.24 ~ 2.83 as the  $\tau_f$  value arose. The PD plots in Figure S21 (q, r) showed that the  $\tau_f$  ranges lower than 3.46, 4.13 ~ 4.78 and higher than 4.78 would render steady prediction trends, while the range 3.46 ~ 4.13 signaled an overall decreasing tendency. Taking both factors into consideration, if we seek HOIPs with lower bandgaps, the value of  $t_f$  should not be over 1.014 (or even lower than 0.971) and the value of  $\tau_f$  is recommended to be 3.50 ~ 4.18 (4.18 determines the structure formability as indicated in reference<sup>30</sup>), while HOIPs with  $t_f > 1.014$  and  $\tau_f < 3.5$  tend to own the larger bandgaps.



```

import joblib, rumpy as np
from fml.data import read_data
from fml.ensemble import VotingShap
from shap import plots
from copy import deepcopy
import matplotlib.pyplot as plt
plt.rcParams['figure.dpi'] = 300

# read voting model
voting_model = joblib.load("../code7//vr.joblib")
# read experimental data set
dataset = read_data("../code2//H0IP_dataset_437.xlsx", df=False)
# fit voting shap object or the user could choose the supplied fitted object "votingshap_experimental.joblib"
vs = VotingShap(voting_model, dataset).fit() # vs = joblib.load("votingshap_experimental.joblib")
# read the feature names
columns = vs.columns_set[1:]
# read X and Y
X = vs.dataobject.to_df().iloc[:, 1:]
predicted_Y = voting_model.predict(dataset)
# read shap values
shap_values = vs.shap_values

# feature importance bar plot
plots.bar(deepcopy(shap_values), max_display=11)

# instance distribution plot
instance_order = np.array(sorted(zip(np.arange(len(X)), predicted_Y), key=lambda x: x[1], reverse=True))[:, 0].astype(int)
plots.heatmap(deepcopy(shap_values), max_display=11, instance_order=instance_order)

# decision plot
plots.decision(shap_values.base_values[0], deepcopy(shap_values.values), feature_names=columns)

# beeswarm plot
plots.beeswarm(deepcopy(shap_values), order=vs.feature_order, max_display=11)

# violin plot
plots.violin(deepcopy(shap_values.values), X, feature_names=columns, max_display=11)

# scatter plots for each feature
for findex in vs.feature_order[:10]:
    fname = X.columns[findex]
    plots.scatter(deepcopy(shap_values[:, findex]), color=predicted_Y)

# ICE plots for each feature
for findex in vs.feature_order[:10]:
    fname = X.columns[findex]
    plots.partial_dependence(findex, vs.predict, X, feature_names=columns)

# PD plots for each feature
for findex in vs.feature_order[:10]:
    fname = X.columns[findex]
    plots.partial_dependence(findex, vs.predict, X, feature_names=columns, ice=False)

```

Figure S15 The code to perform SHAP analysis for experimental data set

```

import joblib, numpy as np
from fml.ensemble import VotingShap
from shap import plots
from copy import deepcopy
import matplotlib.pyplot as plt
plt.rcParams["figure.dpi"] = 300

# read voting model
voting_model = joblib.load("../code7//vr.joblib")
# read virtual data set
dataset = joblib.load("dataset_virtual.joblib")
dataset = dataset.astype(float)
# fit voting shap object or the user could choose the supplied fitted object "votingshap_virtual.joblib"
vs = VotingShap(voting_model, dataset).fit() # vs = joblib.load("votingshap_virtual.joblib")
# read the feature names
columns = vs.columns_set[1:]
# read X and Y
X = vs.dataobject.to_df().iloc[:, 1:]
predicted_Y = voting_model.predict(dataset)
# read shap values
shap_values = vs.shap_values

# feature importance bar plot
plots.bar(deepcopy(shap_values), max_display=11)

# instance distribution plot
instance_order = np.array(sorted(zip(np.arange(len(X)), predicted_Y), key=lambda x: x[1], reverse=True))[:, 0].astype(int)
plots.heatmap(deepcopy(shap_values), max_display=11, instance_order=instance_order)

# decision plot
plots.decision(shap_values.base_values[0], deepcopy(shap_values.values), feature_names=columns)

# beeswarm plot
plots.beeswarm(deepcopy(shap_values), order=vs.feature_order, max_display=11)

# violin plot
plots.violin(deepcopy(shap_values.values), X, feature_names=columns, max_display=11)

# scatter plots for each feature
for findex in vs.feature_order[:10]:
    fname = X.columns[findex]
    plots.scatter(deepcopy(shap_values[:, findex]), color=predicted_Y)

# ICE plots for each feature
for findex in vs.feature_order[:10]:
    fname = X.columns[findex]
    plots.partial_dependence(findex, vs.predict, X, feature_names=columns)

# PD plots for each feature
for findex in vs.feature_order[:10]:
    fname = X.columns[findex]
    plots.partial_dependence(findex, vs.predict, X, feature_names=columns, ice=False)

```

Figure S16 The code to perform SHAP analysis for virtual data set

```

import joblib, pandas as pd
from fml.data import DataObject
from fml.searching import HOIPHTSWithVotingRegressor

# load voting regressor model
voting_model = joblib.load("../code7//vr.joblib")
# define site elements
site_elements = {'A': ['MA', 'FA', 'CS', 'GA', 'EA', 'ED'],
                 'B': ['Pb', 'Sn', 'Ge', 'Cd', 'Pd'],
                 'C': ['I', 'Cl', 'Br']}

# high-throughput calculating
hoip_hts = HOIPHTSWithVotingRegressor(True). \
    fit_with_full_range(voting_model,
                       list(site_elements.values()), [2, 2, 2],
                       steps=[.25, .25, 1.0], starts=[0, 0, 0],
                       ends=[1, 1, 3])

# generating the virtual data set
descriptors = pd.concat(hoip_hts.descriptors, axis=1).T
HTS_shap_data = DataObject(X=descriptors.values, Y=hoip_hts.predictions.values,
                           Xnames=descriptors.columns, indexes=hoip_hts.predictions.index,
                           Yname=hoip_hts.predictions.name)

# save to local
joblib.dump(HTS_shap_data.to_df(), "dataset_virtual.joblib")

```

Figure S17 The code to generate virtual data set

Table S8 Elements in A, B, C sites along with their count numbers. The references and SMILE formats were also given after table.

| Element in A site | Count | Element in B site | Count | Element in C site | Count |
|-------------------|-------|-------------------|-------|-------------------|-------|
| MA                | 291   | Pb                | 386   | I                 | 386   |
| FA                | 269   | Sn                | 135   | Br                | 235   |
| CS                | 145   | Bi                | 11    | Cl                | 26    |
| GA                | 8     | Cd                | 6     |                   |       |

|    |   |    |   |  |  |
|----|---|----|---|--|--|
| ED | 8 | Ge | 5 |  |  |
| Rb | 7 | Sr | 3 |  |  |
| BA | 6 | Ca | 3 |  |  |
| K  | 6 | Cr | 2 |  |  |
| EA | 5 | Pd | 1 |  |  |
| PE | 5 | La | 1 |  |  |
| HE | 5 |    |   |  |  |
| A  | 3 |    |   |  |  |
| AN | 1 |    |   |  |  |
| AZ | 1 |    |   |  |  |
| AA | 1 |    |   |  |  |

MA -- C[NH3+] -- ref<sup>31</sup>;

FA -- NC=[NH2+] -- ref<sup>32</sup>;

GA -- NC(N)=[NH2+] -- ref<sup>33</sup>;

ED -- [NH3+]CC[NH3+] -- ref<sup>34</sup>;

BA -- CCCC[NH3+] -- ref<sup>35</sup>;

EA -- CC[NH3+] -- ref<sup>36</sup>;

PE -- [NH3+]CCC1=CC=CC=C1 -- ref<sup>37</sup>;

HE -- OCC[NH3+] -- ref<sup>10</sup>;

A -- [NH4+] -- ref<sup>5</sup>;

AN -- C1CC[NH2+]C1 -- ref<sup>38</sup>;

AZ -- C[NH+](C)CCC[NH3+] -- ref<sup>39</sup>;

AA -- C[NH2+]C -- ref<sup>40</sup>.

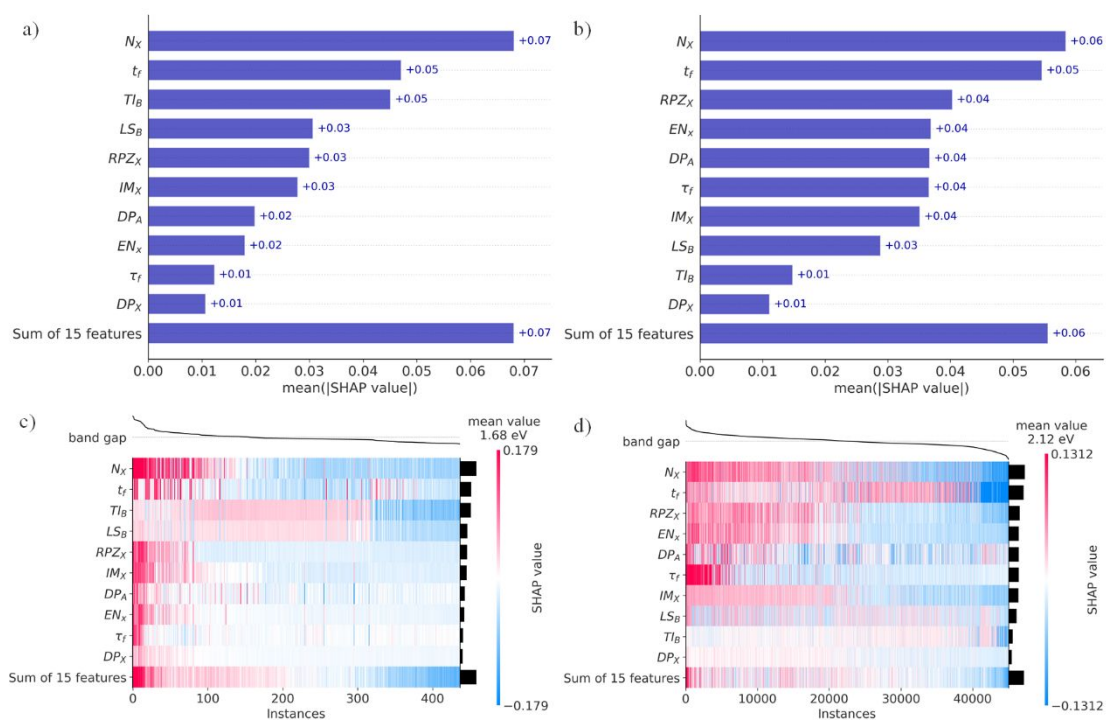

Figure S18 Feature importance for experimental data set (a) and virtual data set (b); Distributions of SHAP values with feature values for experimental data set (c) and virtual data set (d)

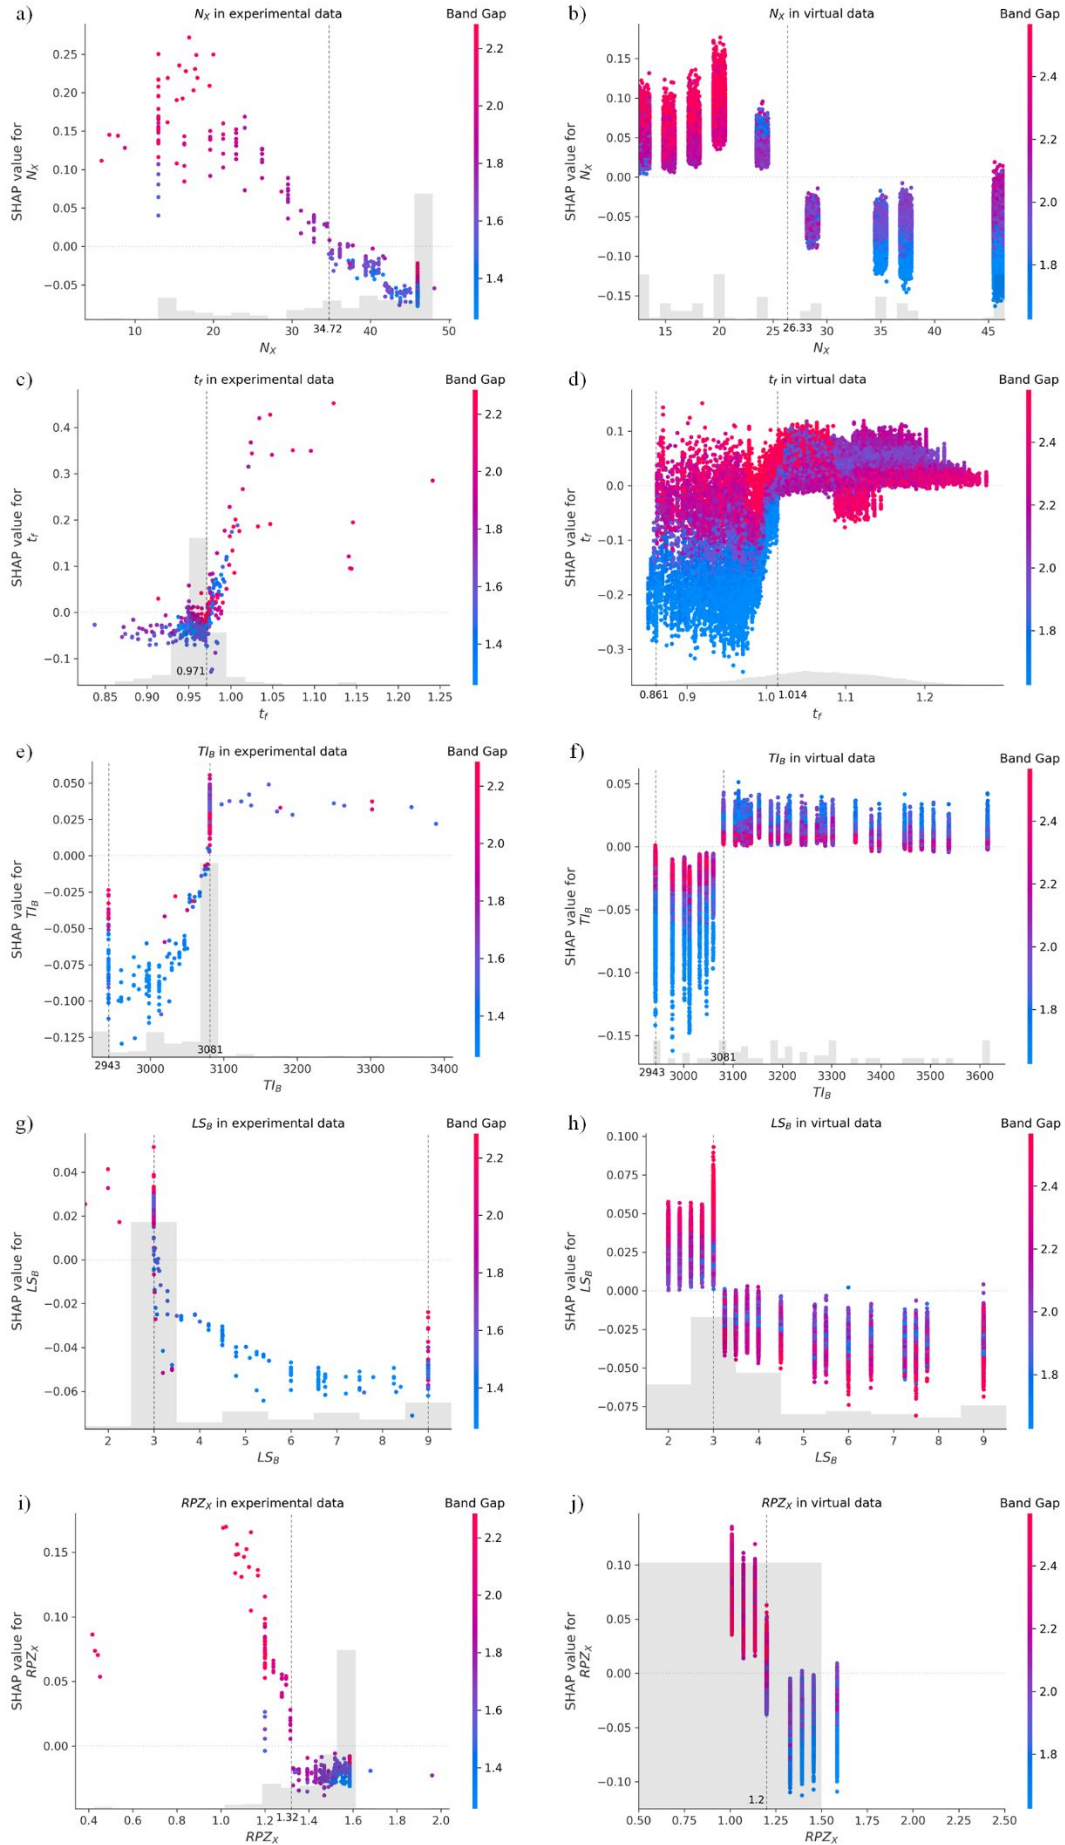

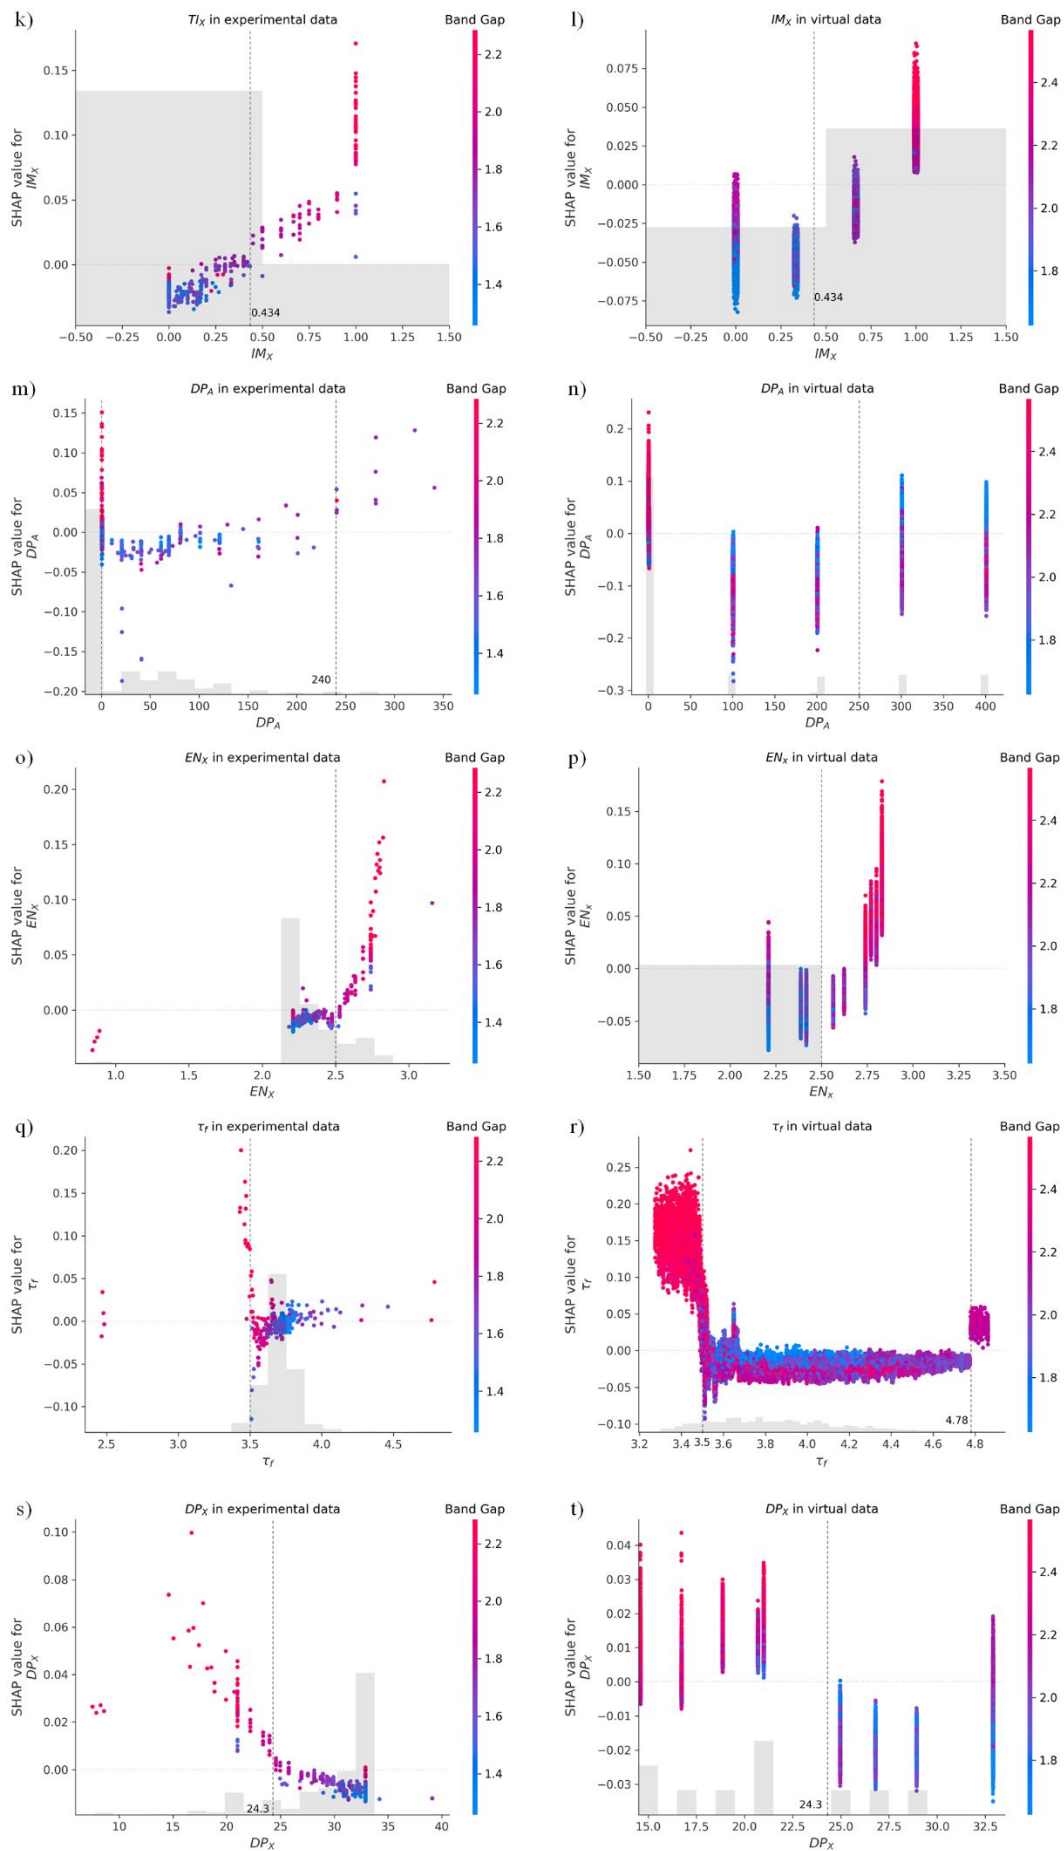

Figure S19 Scatter plots of the features  $N_x$  (a),  $t_f$  (c),  $TI_B$  (e),  $LS_B$  (g),  $RPZ_X$  (i),  $IM_X$  (k),  $DP_A$  (m),  $EN_X$ (o),  $\tau_f$  (q),  $DP_X$  (s) in experimental data, and the features  $N_x$  (b),  $t_f$  (d),  $TI_B$  (f),  $LS_B$  (h),  $RPZ_X$  (j),  $IM_X$  (l),  $DP_A$  (n),  $EN_X$ (p),  $\tau_f$  (r),  $DP_X$  (t) in virtual data.

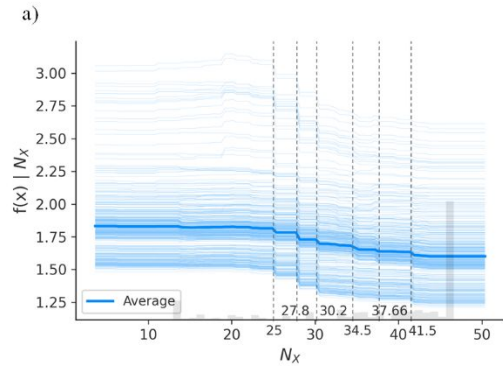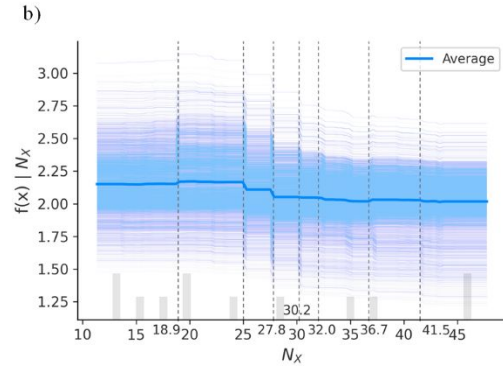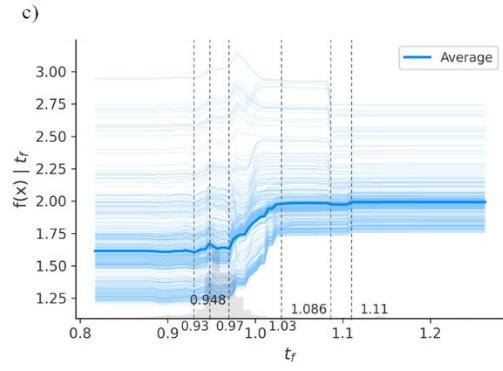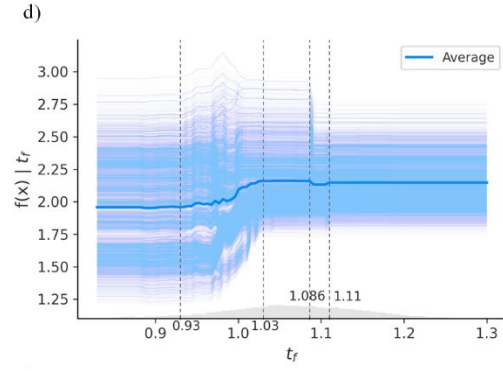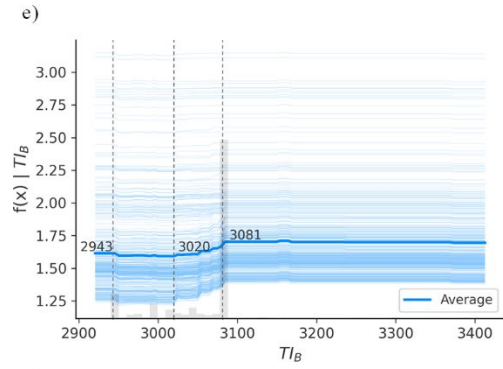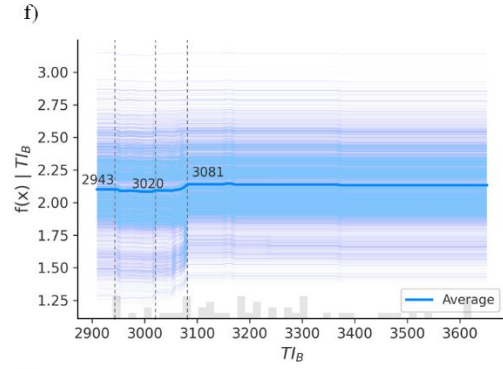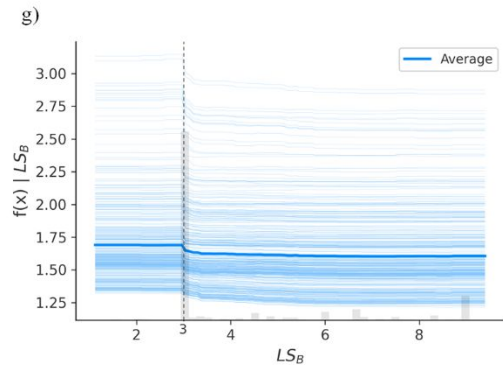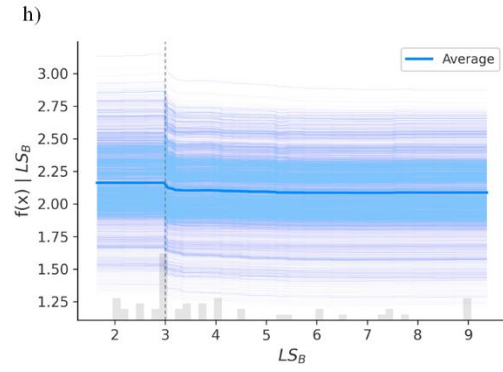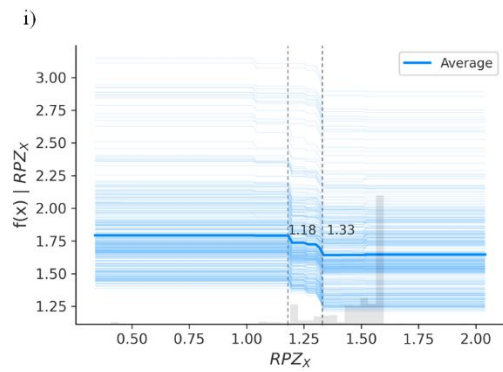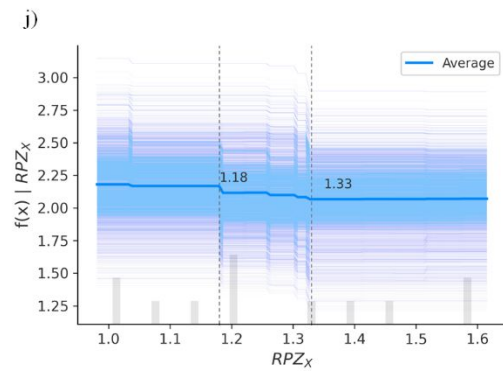

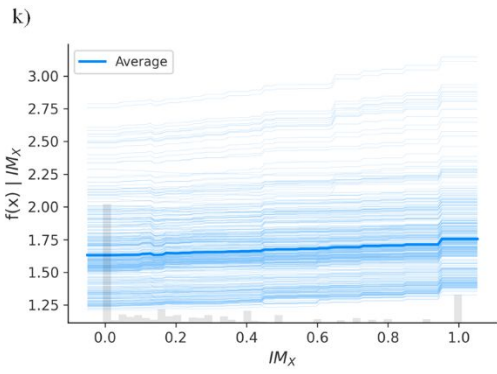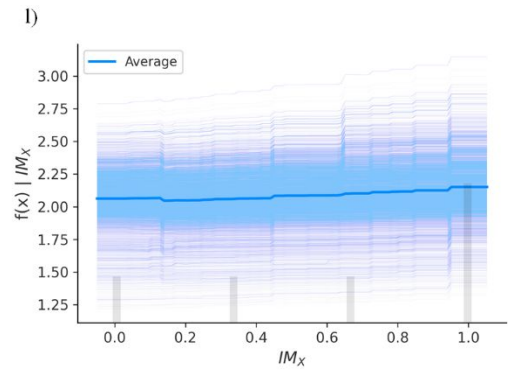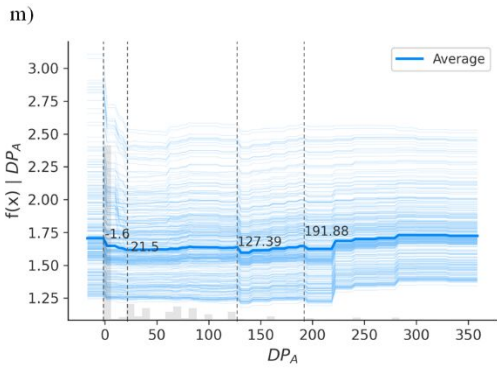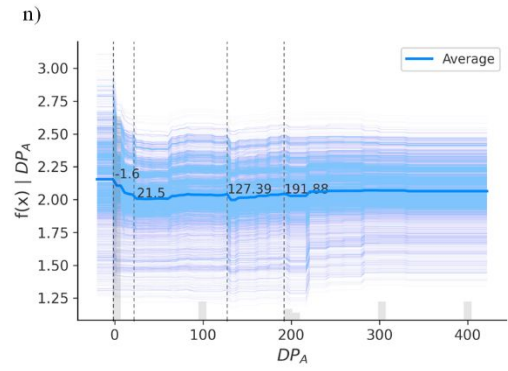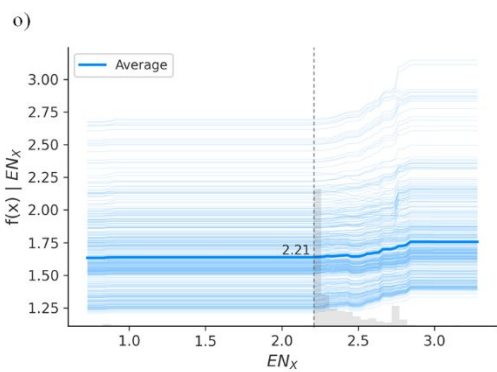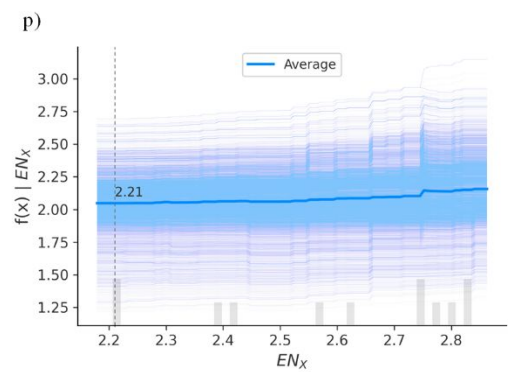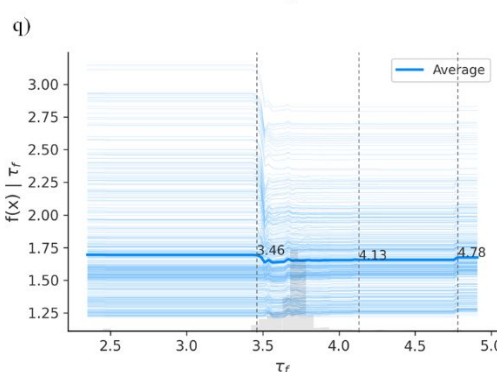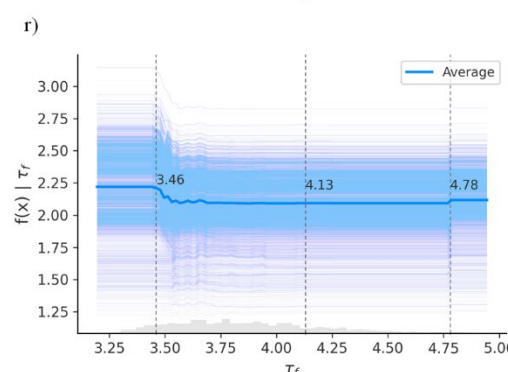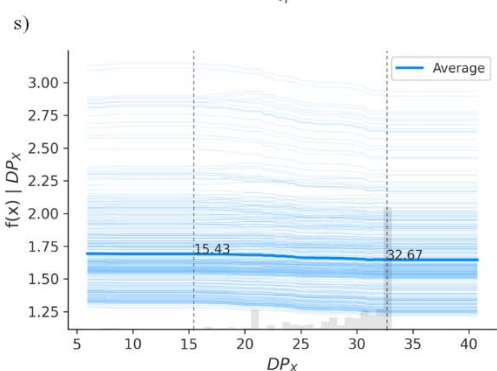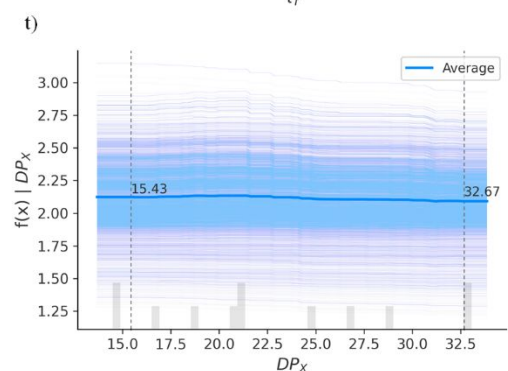



Figure S20 Individual conditional expectation (ICE) plots of the features  $N_x$  (a),  $t_f$  (c),  $TI_B$  (e),  $LS_B$  (g),  $RPZ_X$  (i),  $IM_X$  (k),  $DP_A$  (m),  $EN_X$ (o),  $\tau_f$  (q),  $DP_X$  (s) in experimental data, and the features  $N_x$  (b),  $t_f$  (d),  $TI_B$  (f),  $LS_B$  (h),  $RPZ_X$  (j),  $IM_X$  (l),  $DP_A$  (n),  $EN_X$ (p),  $\tau_f$  (r),  $DP_X$  (t) in virtual data.

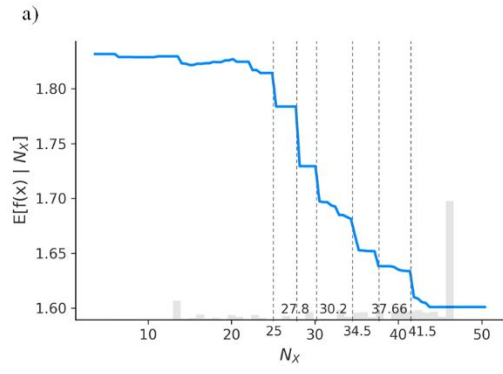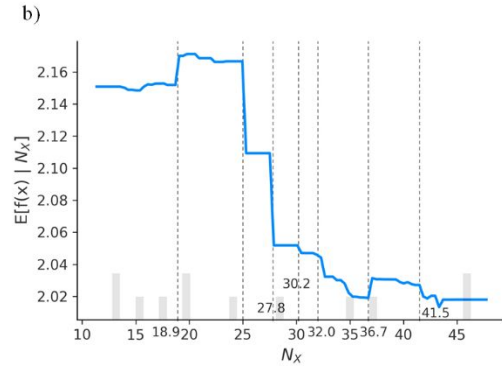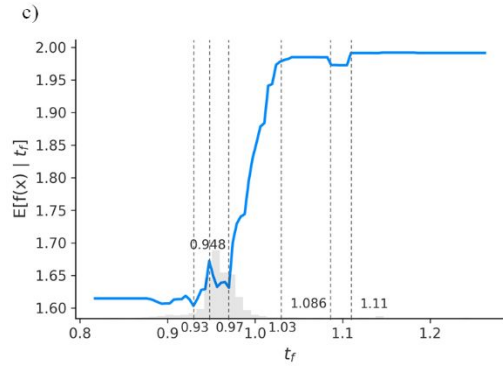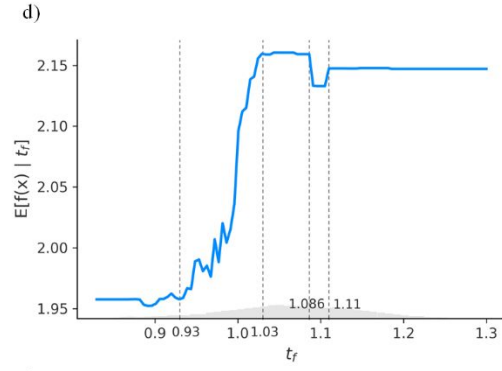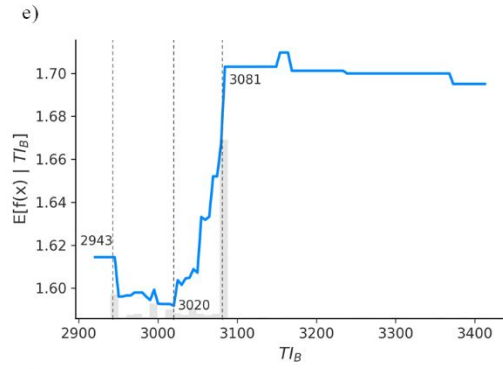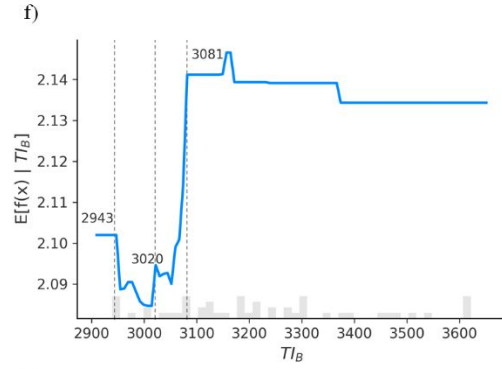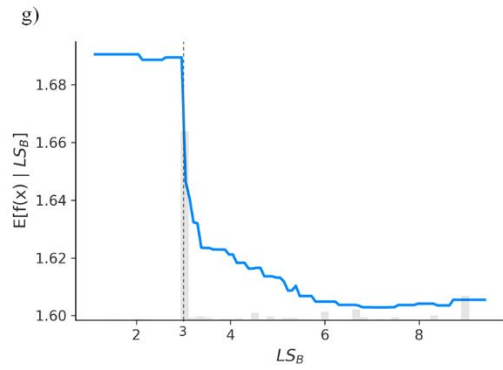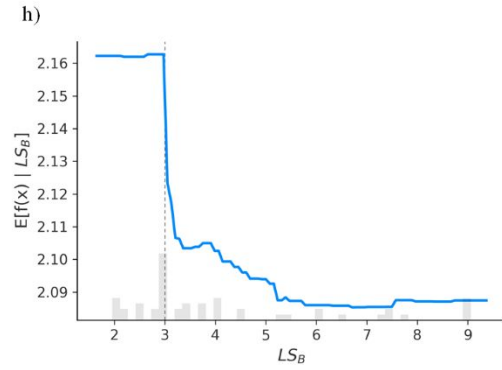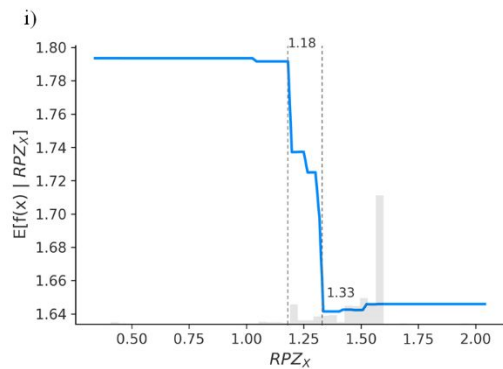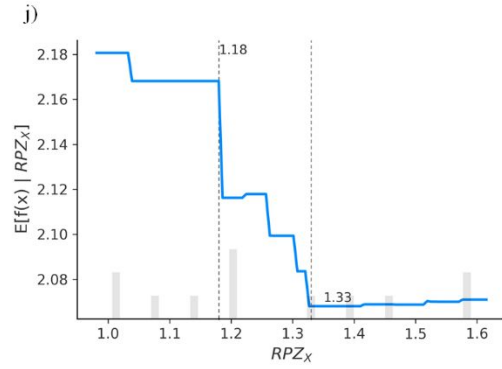

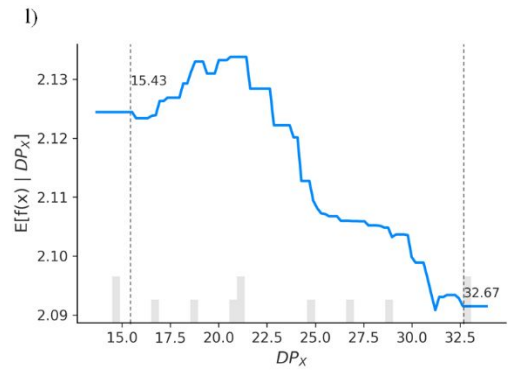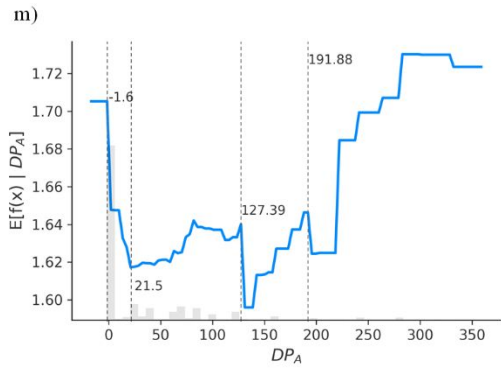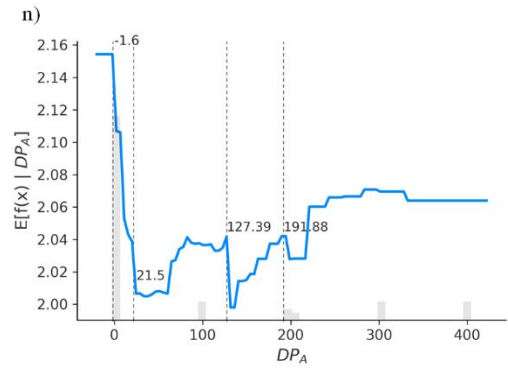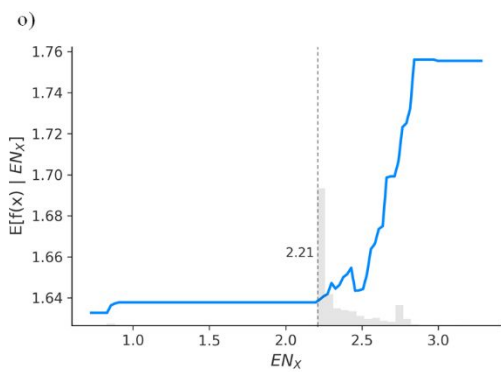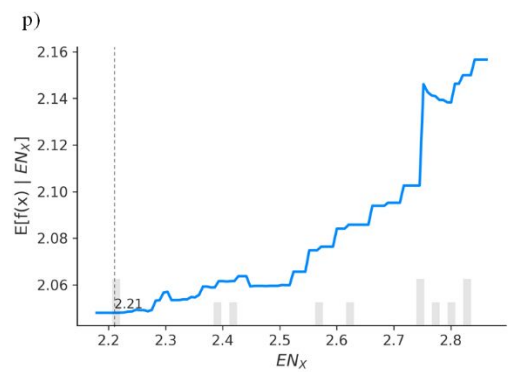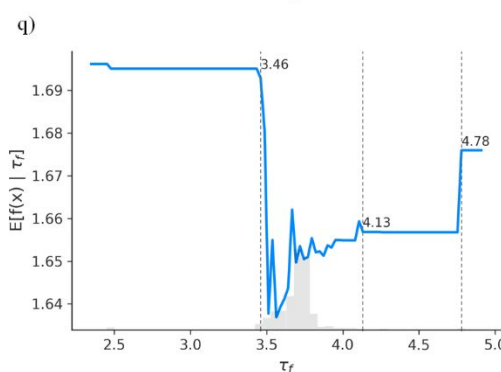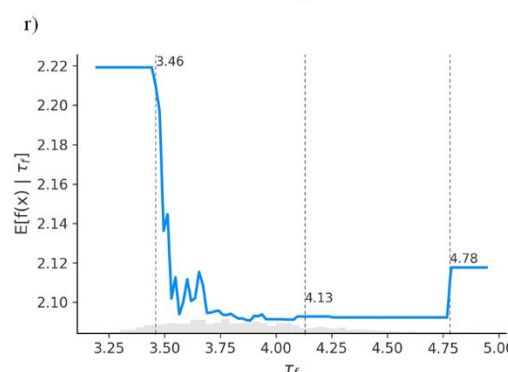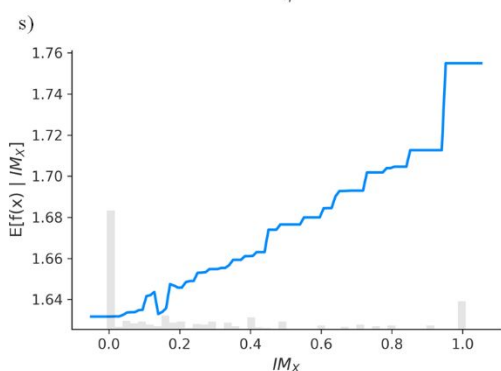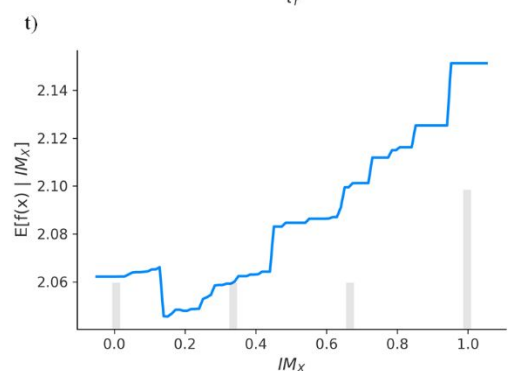

Figure S21 Partial dependency (PD) plots of the features  $N_x$  (a),  $t_f$  (c),  $TI_B$  (e),  $LS_B$  (g),  $RPZ_X$  (i),  $DP_X$  (k),  $DP_A$  (m),  $EN_X$ (o),  $\tau_f$  (q),  $IM_X$  (s) in experimental data, and the features  $N_x$  (b),  $t_f$  (d),  $TI_B$  (f),  $LS_B$  (h),  $RPZ_X$  (j),  $DP_X$  (l),  $DP_A$  (n),  $EN_X$ (p),  $\tau_f$  (r),  $IM_X$  (t) in virtual data.

## Code S9 Proactive Searching Progress (PSP)

A so-called proactive searching progress (PSP) (Figure S22) was proposed to exert an efficient searching for the potential materials with expected values. The first step in this code is to load the established WVR “voting\_model” from Code S7 and assemble the feature names into “columns\_set”. The collected 88 organic fragments and 3 three metal elements were considered for A site, while 9 metal elements and 3 halogen elements were prepared for B/C site. The criterion was set as 0.05 eV determining whether the potential materials could be retained. The PSP could be run for multiple times for various initial point to start searching. The expected value was set as a fixed number or chosen from a list that contained multiple values. The doping form was needed to be defined such as 3, 3, 3 which meant for each site there were 3 elements/fragments. The iteration determined the searching steps in PSP. The results for each run of PSP would be recorded into local file in .csv format. Then the PSP would be exerted by using the module “HOIPHyperSearchingWithVotingRegressor”. The code is in “./code9/code9.py”, while the searching results were only accessible in our GitHub website (<https://github.com/luktian/InverseDesignViaPSP>) because of the large file size.

```

from fml.formulars import SplitFormular
from fml.descriptors import base_descriptor
from fml.searching import HOIPHyperSearchingWithVotingRegressor
import joblib, numpy as np, pandas as pd, os, time, random

# Load WVR model
voting_model = joblib.load("../code7/vr.joblib")

# Load the feature names from WVR model
columns_set = []
for trainobj in voting_model.trainobjects:
    columns_set += trainobj.Xnames.tolist()
columns_set = list(set(columns_set))

# Set the organic fragments and elements for each site
formular_info = [
    base_descriptor.index[118:].tolist() + ["K", "Cs", "Rb"], # atoms in A site
    ["Pb", "Sn", "Ge", "Pd", "Bi", "Sr", "Ca", "Cr", "La"], # atoms in B site
    ["Cl", "Br", "I"] # atoms in C site
]

# Set the criterion value
criterion = 0.05
# The object used to split formulae
splitformular = SplitFormular()

start_time = time.time()

# Run the proactive searching progress (PSP) for multiple times
for i in range(1000):

    # Set multiple expectation values to exert different searching
    targeted_value = random.choice([1.35, 1.40, 1.45])
    # Or set a single value
    targeted_value = 1.35

    # Choose one doping form
    site_counts = np.array(random.choice([
        [1, 1, 1], [2, 1, 1], [1, 2, 1], [1, 1, 2],
        [1, 2, 2], [2, 1, 2], [2, 2, 1], [2, 2, 2], [3, 3, 3],
    ]))
    # Or set a single form
    site_counts = np.array([3, 3, 3])

    # Choose an iteration step in PSP
    iteration = random.choice(np.linspace(100, 1000, 11).astype(int))

    # Set the output file
    output_file = f"outputs[''.join(site_counts.astype(str))].csv"

    # Write information into output file
    if not os.path.exists(output_file):
        with open(output_file, "w") as f:
            f.writelines(f"formular, Prediction, {''.join(columns_set)}\n")
        existed_formulars = []
    else:
        existed_formulars = pd.read_csv(output_file, index_col=0).index.tolist()
        if len(existed_formulars) > 0:
            existed_formulars = splitformular.split_formulars(existed_formulars)[0]

    # Perform the PSP
    hhwvr = HOIPHyperSearchingWithVotingRegressor(iteration, True, True). \
        fit_with_full_range(voting_model, formular_info, targeted_value,
                           criterion, site_counts=site_counts)

    # Write the PSP results into output file
    if len(hhwvr.trials) > 0:
        trials = np.array(hhwvr.trials)
        trials_descriptors = pd.DataFrame(trials[:, 3:],
                                         index=trials[:, 0],
                                         columns=hhwvr.descriptor_names.tolist()
                                         )[columns_set].astype(float)

        predictions = trials[:, 1].astype(float)

        with open(output_file, "a") as f:
            for prediction, (formular, descriptors) in \
                zip(predictions, trials_descriptors.iterrows()):
                if splitformular.split_formular(formular) not in existed_formulars:
                    f.writelines(f"{formular}, {prediction}, {''.join(descriptors.astype(str).tolist())}\n")

end_time = time.time()
print(f"{end_time - start_time} s")

```

Figure S22 Code for proactive searching progress (PSP).

## **Section S2 Other Figures and Tables**

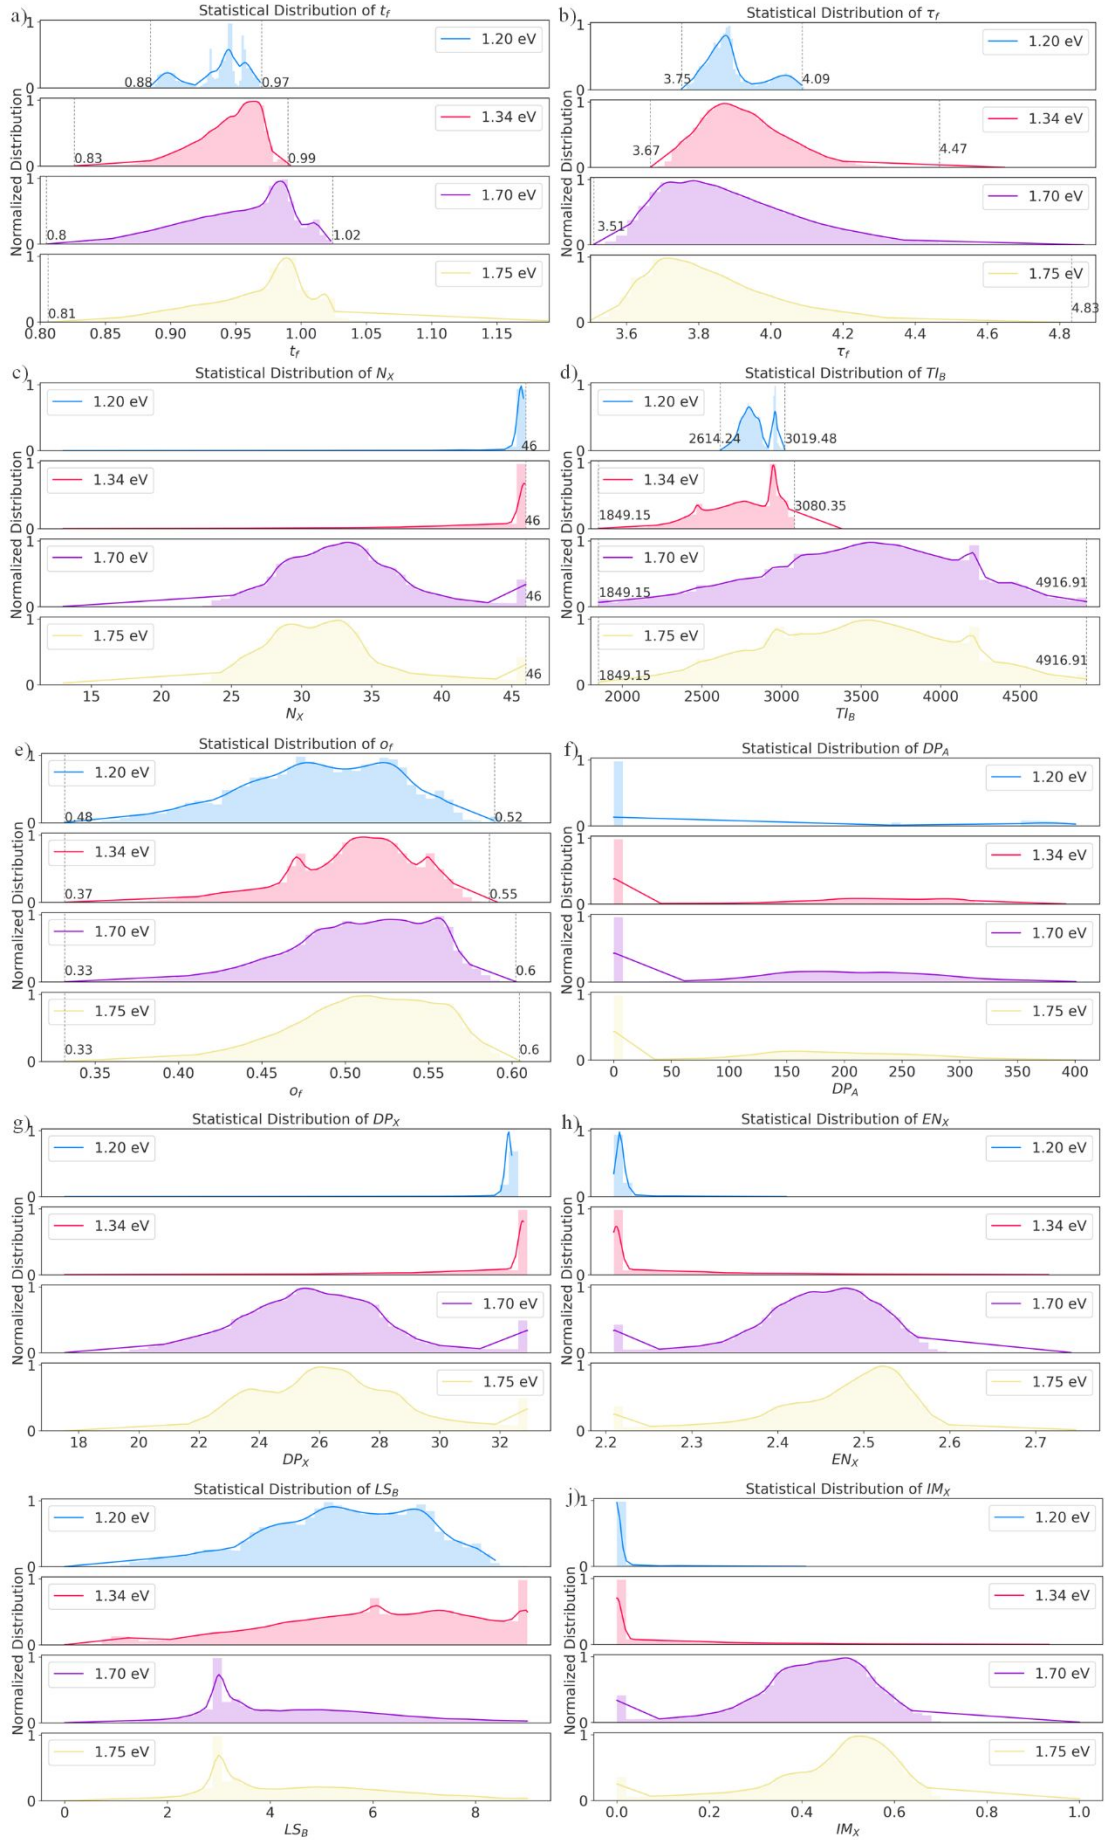

Figure S23 Feature distributions for 4 candidate sets.

Table S9 Searched candidates for 1.34 eV.

| Triple divalent cations HOIP candidate                  | Predicted bandgap |
|---------------------------------------------------------|-------------------|
| MA0.215Cs0.432FA0.353Sn0.924Ge0.039Pd0.038I2.708Br0.29  | 1.3400            |
| 2                                                       |                   |
| Cs0.334FA0.266MA0.4Pd0.228Ge0.003Sn0.769I2.837Br0.164   | 1.3400            |
| MA0.296FA0.338Cs0.366Cr0.104Sn0.8Pd0.096Br0.056I2.944   | 1.3401            |
| FA0.412Cs0.509MA0.079Ge0.095Cr0.271Sn0.634Br0.109I2.89  | 1.3399            |
| 1                                                       |                   |
| MA0.289FA0.333Cs0.378Cr0.099Sn0.804Pd0.097Br0.005I2.995 | 1.3398            |
| MA0.29FA0.339Cs0.372Cr0.001Sn0.8Pd0.199Br0.061I2.939    | 1.3398            |
| MA0.345FA0.306Cs0.349Cr0.003Sn0.921Pd0.076Br0.005I2.995 | 1.3398            |
| Cs0.307FA0.373MA0.32Ge0.019Sn0.939Ca0.041Br0.287I2.713  | 1.3403            |
| MA0.282FA0.336Cs0.381Pd0.159Sn0.839Cr0.002Br0.003I2.998 | 1.3397            |
| FA0.02MA0.693Cs0.287Cr0.168Pd0.037Sn0.795Br0.003I2.998  | 1.3396            |
| MA0.314FA0.348Cs0.338Cr0.066Sn0.816Pd0.118Br0.176I2.824 | 1.3404            |
| MA0.306FA0.338Cs0.356Cr0.097Sn0.81Pd0.093Br0.046I2.954  | 1.3404            |
| Cs0.396MA0.035FA0.569Sn0.719Ge0.219Pd0.062Br0.013I2.98  | 1.3406            |
| 7                                                       |                   |
| Cs0.419FA0.253MA0.328Ge0.003Sn0.708Pd0.288Br0.019I2.98  | 1.3407            |
| 2                                                       |                   |
| FA0.462MA0.169Cs0.369Cr0.151Ge0.138Sn0.711I2.986Br0.01  | 1.3408            |
| 4                                                       |                   |
| MA0.305FA0.337Cs0.359Cr0.129Sn0.723Pd0.148Br0.05I2.95   | 1.3391            |
| FA0.424MA0.185Cs0.39Cr0.158Ge0.162Sn0.68I2.989Br0.011   | 1.3390            |
| FA0.403MA0.168Cs0.429Cr0.195Pd0.113Sn0.693I2.984Br0.016 | 1.3390            |
| Cs0.423FA0.243MA0.334Ge0.059Sn0.713Pd0.228Br0.01I2.99   | 1.3411            |
| MA0.289FA0.334Cs0.377Cr0.113Sn0.773Pd0.113Br0.057I2.943 | 1.3388            |
| Cs0.429MA0.138FA0.433Sn0.765Ge0.182Pd0.053Br0.059I2.94  | 1.3412            |
| 1                                                       |                   |
| FA0.425Cs0.513MA0.062Ge0.142Cr0.122Sn0.735Br0.105I2.89  | 1.3387            |
| 5                                                       |                   |
| MA0.315FA0.335Cs0.35Cr0.088Sn0.777Pd0.135Br0.061I2.94   | 1.3414            |
| MA0.304FA0.332Cs0.364Cr0.098Sn0.825Pd0.078Br0.054I2.946 | 1.3386            |
| MA0.373Cs0.495FA0.133Cr0.243Pd0.081Sn0.676I2.902Br0.098 | 1.3386            |
| MA0.278FA0.314Cs0.407Ge0.197Sn0.782Cr0.021Br0.047I2.95  | 1.3385            |
| 3                                                       |                   |
| FA0.466Cs0.499MA0.035Ge0.188Cr0.127Sn0.686Br0.196I2.80  | 1.3385            |
| 3                                                       |                   |
| MA0.288FA0.339Cs0.373Cr0.069Sn0.891Pd0.041Br0.061I2.939 | 1.3385            |
| Cs0.436FA0.306MA0.258Ge0.004Sn0.732Pd0.264Br0.052I2.94  | 1.3384            |
| 8                                                       |                   |
| MA0.327FA0.316Cs0.357Cr0.022Sn0.869Pd0.11Br0.002I2.998  | 1.3384            |



| MA0.296FA0.339Cs0.365Cr0.131Sn0.78Pd0.089Br0.044I2.956  | 1.3416            |
|---------------------------------------------------------|-------------------|
| FA0.363Cs0.521MA0.116Ge0.174Cr0.224Sn0.602Br0.106I2.89  | 1.3383            |
| 3                                                       |                   |
| FA0.037MA0.746Cs0.217Cr0.073Pd0.047Sn0.88Br0.058I2.942  | 1.3418            |
| MA0.302FA0.327Cs0.371Cr0.055Sn0.772Pd0.172Br0.003I2.997 | 1.3418            |
| FA0.483Cs0.501MA0.016Ge0.138Cr0.157Sn0.704Br0.142I2.85  | 1.3418            |
| 8                                                       |                   |
| FA0.486Cs0.358MA0.155Cr0.123Pd0.163Sn0.714I2.998Br0.002 | 1.3381            |
| MA0.324FA0.343Cs0.333Cr0.116Sn0.851Pd0.033Br0.162I2.838 | 1.3381            |
| MA0.338FA0.347Cs0.315Cr0.062Sn0.865Pd0.073Br0.001I2.998 | 1.3419            |
| FA0.432Cs0.369MA0.199Ge0.148Cr0.084Sn0.767Br0.12I2.881  | 1.3420            |
| Double divalent cations HOIP candidate                  | Predicted bandgap |
| MA0.191FA0.403Cs0.406Sn0.76Cr0.24Br0.01I2.99            | 1.3400            |
| FA0.177Cs0.353MA0.471Cr0.279Sn0.721I2.995Br0.004        | 1.3400            |
| Cs0.494MA0.217FA0.289Sn0.866Ge0.134I2.623Br0.377        | 1.3400            |
| FA0.235Cs0.214MA0.551Sn0.955Ge0.044I2.256Br0.744        | 1.3400            |
| Cs0.299MA0.675FA0.025Sn0.816Pd0.183Br0.051I2.949        | 1.3400            |
| MA0.211FA0.391Cs0.398Sn0.872Pd0.128Br0.031I2.968        | 1.3400            |
| MA0.306FA0.325Cs0.369Cr0.262Sn0.738Br0.002I2.998        | 1.3400            |
| Cs0.305FA0.273MA0.422Sn0.975Cr0.025I2.737Br0.264        | 1.3399            |
| MA0.215FA0.406Cs0.379Sn0.87Pd0.131Br0.009I2.991         | 1.3399            |
| MA0.295Cs0.378FA0.327Pd0.148Sn0.852I2.999Br0.001        | 1.3399            |
| MA0.485FA0.07Cs0.445Sn0.764Cr0.236Br0.032I2.969         | 1.3401            |
| Cs0.181MA0.409FA0.41Cr0.096Sn0.905I2.995Br0.005         | 1.3399            |
| MA0.191FA0.415Cs0.394Sn0.892Pd0.108Br0.037I2.963        | 1.3399            |
| FA0.592MA0.333Cs0.075Sn0.957Ge0.044I2.745Br0.255        | 1.3399            |
| Cs0.248MA0.343FA0.409Pd0.246Sn0.754I2.962Br0.039        | 1.3399            |
| Cs0.256MA0.524FA0.22Sn0.873Pd0.127I2.993Br0.007         | 1.3401            |
| Cs0.23MA0.401FA0.369Pd0.2Sn0.799I2.942Br0.058           | 1.3401            |
| FA0.285MA0.334Cs0.382Sn0.739Cr0.262I2.911Br0.089        | 1.3398            |
| MA0.504FA0.077Cs0.419Sn0.704Cr0.295Br0.005I2.995        | 1.3402            |
| FA0.278MA0.33Cs0.392Sn0.752Cr0.248I2.984Br0.016         | 1.3402            |
| Cs0.227MA0.367FA0.406Pd0.178Sn0.823I2.923Br0.077        | 1.3398            |
| MA0.364Cs0.225FA0.411Sn0.999Pd0.001I2.757Br0.243        | 1.3398            |
| Cs0.136FA0.084MA0.78Sn0.949Ge0.051Br0.51I2.49           | 1.3402            |
| Cs0.365FA0.461MA0.174Pd0.191Sn0.809I2.964Br0.036        | 1.3402            |
| FA0.283MA0.322Cs0.395Sn0.77Cr0.23I2.991Br0.009          | 1.3397            |
| FA0.371MA0.294Cs0.335Sn0.977Pd0.023Br0.473I2.528        | 1.3397            |
| FA0.068MA0.6Cs0.333Pd0.323Sn0.677I2.775Br0.225          | 1.3403            |
| MA0.266FA0.517Cs0.217Sn0.979Cr0.022Br0.317I2.683        | 1.3397            |
| MA0.507FA0.105Cs0.389Sn0.707Cr0.293Br0.077I2.923        | 1.3403            |
| FA0.398Cs0.397MA0.204Sn0.823Pd0.178Br0.003I2.997        | 1.3397            |
| MA0.239FA0.492Cs0.269Sn0.992Pd0.007Br0.354I2.646        | 1.3403            |
| FA0.407Cs0.295MA0.299Sn0.947Ge0.052Br0.43I2.57          | 1.3397            |

|                                                       |        |
|-------------------------------------------------------|--------|
| MA0.179Cs0.527FA0.294Sn0.84Pd0.16I2.909Br0.09         | 1.3403 |
| Cs0.241MA0.375FA0.384Pd0.203Sn0.797I2.934Br0.066      | 1.3403 |
| Cs0.239MA0.372FA0.389Pd0.211Sn0.789I2.957Br0.043      | 1.3404 |
| MA0.203FA0.513Cs0.284Sn0.949Pd0.051Br0.352I2.647      | 1.3396 |
| MA0.239FA0.384Cs0.377Sn0.693Pd0.308Br0.092I2.908      | 1.3396 |
| FA0.283MA0.325Cs0.392Sn0.749Cr0.251I2.982Br0.018      | 1.3404 |
| Cs0.267MA0.337FA0.396Pd0.21Sn0.791I2.905Br0.095       | 1.3396 |
| MA0.23FA0.373Cs0.397Sn0.687Pd0.314Br0.099I2.901       | 1.3396 |
| MA0.303Cs0.331FA0.367Sn0.995Sr0.005I2.668Br0.332      | 1.3404 |
| FA0.357MA0.305Cs0.337Sn0.633Pd0.367Br0.101I2.899      | 1.3396 |
| FA0.123Cs0.418MA0.459Sn0.775Cr0.226I2.96Br0.04        | 1.3405 |
| FA0.328Cs0.52MA0.152Pd0.209Sn0.792Br0.085I2.915       | 1.3395 |
| MA0.194FA0.402Cs0.405Sn0.82Pd0.181Br0.054I2.946       | 1.3405 |
| Cs0.28FA0.536MA0.185Ge0.049Sn0.952Br0.847I2.154       | 1.3395 |
| FA0.428Cs0.017MA0.555Sn0.978Pd0.022Br0.298I2.702      | 1.3395 |
| Cs0.073MA0.63FA0.297Pd0.052Sn0.948Cl0.123I2.73Br0.147 | 1.3405 |
| MA0.187Cs0.349FA0.463Pd0.225Sn0.774I2.938Br0.061      | 1.3405 |
| MA0.213FA0.535Cs0.252Sn0.961Pd0.039Br0.475I2.524      | 1.3405 |
| Cs0.263MA0.567FA0.17Sn0.927Cr0.074Br0.031I2.969       | 1.3406 |
| FA0.453MA0.116Cs0.431Pd0.161Sn0.839Br0.072I2.928      | 1.3406 |
| MA0.235FA0.465Cs0.3Sn0.93Pd0.07Br0.302I2.698          | 1.3406 |
| Cs0.174MA0.703FA0.123Sn0.803Pd0.196I2.998Br0.002      | 1.3394 |
| MA0.213FA0.394Cs0.393Sn0.733Pd0.267Br0.008I2.992      | 1.3394 |
| MA0.216FA0.392Cs0.392Sn0.733Pd0.267Br0.008I2.992      | 1.3394 |
| Cs0.28MA0.547FA0.173Sn0.844Pd0.156I2.973Br0.027       | 1.3406 |
| Cs0.122MA0.757FA0.121Sn0.952Ge0.048I2.353Br0.646      | 1.3394 |
| MA0.173FA0.402Cs0.425Sn0.774Pd0.225Br0.001I2.999      | 1.3406 |
| MA0.465FA0.078Cs0.457Sn0.766Cr0.234Br0.001I2.999      | 1.3406 |
| Cs0.24MA0.391FA0.369Pd0.14Sn0.86I2.924Br0.076         | 1.3394 |
| Cs0.248MA0.381FA0.371Pd0.22Sn0.78I2.959Br0.041        | 1.3394 |
| Cs0.086MA0.733FA0.181Sn0.929Ge0.071I2.418Br0.582      | 1.3406 |
| FA0.276MA0.325Cs0.399Sn0.742Cr0.258I2.984Br0.016      | 1.3394 |
| MA0.323FA0.313Cs0.364Cr0.301Sn0.699Br0.001I2.998      | 1.3407 |
| Cs0.251MA0.379FA0.37Pd0.219Sn0.781I2.921Br0.079       | 1.3393 |
| Cs0.073MA0.692FA0.235Sn0.951Ge0.048I2.414Br0.586      | 1.3407 |
| FA0.259MA0.481Cs0.26Ge0.105Sn0.895I2.57Br0.43         | 1.3393 |
| Cs0.264MA0.375FA0.361Pd0.118Sn0.882I2.999Br0.001      | 1.3393 |
| Cs0.236MA0.394FA0.37Pd0.138Sn0.862I2.938Br0.062       | 1.3393 |
| Cs0.233MA0.381FA0.386Pd0.135Sn0.866I2.956Br0.044      | 1.3393 |
| Cs0.235MA0.407FA0.358Pd0.122Sn0.878I2.938Br0.062      | 1.3393 |
| Cs0.481MA0.215FA0.304Sn0.687Pd0.313I2.999Br0.001      | 1.3408 |
| MA0.196FA0.386Cs0.418Sn0.764Pd0.236Br0.041I2.959      | 1.3392 |
| Cs0.257MA0.381FA0.362Pd0.259Sn0.741I2.918Br0.082      | 1.3408 |
| Cs0.347FA0.216MA0.437Sn0.823Cr0.177I2.956Br0.044      | 1.3408 |

|                                                  |        |
|--------------------------------------------------|--------|
| FA0.06Cs0.544MA0.396Sn0.954Ge0.046Br0.555I2.445  | 1.3408 |
| Cs0.188MA0.66FA0.152Sn0.86Pd0.139I2.995Br0.005   | 1.3408 |
| MA0.335FA0.212Cs0.453Cr0.199Sn0.802Br0.036I2.964 | 1.3408 |
| MA0.223FA0.601Cs0.176Sn0.887Ge0.113Br0.307I2.693 | 1.3392 |
| Cs0.055MA0.94FA0.004Sn0.956Ge0.044I2.35Br0.651   | 1.3392 |
| MA0.323FA0.443Cs0.234Sn0.811Cr0.19Br0.006I2.994  | 1.3392 |
| Cs0.168MA0.699FA0.133Sn0.892Pd0.108I2.997Br0.003 | 1.3391 |
| Cs0.081FA0.025MA0.894Sn0.939Ge0.061Br0.644I2.356 | 1.3409 |
| Cs0.032MA0.578FA0.389Cr0.002Sn0.999I2.804Br0.196 | 1.3409 |
| Cs0.247MA0.385FA0.369Pd0.156Sn0.844I2.946Br0.054 | 1.3409 |
| FA0.382Cs0.338MA0.28Pd0.061Sn0.939Br0.653I2.347  | 1.3409 |
| FA0.156MA0.6Cs0.244Sn0.903Ge0.097Br0.42I2.579    | 1.3409 |
| FA0.343MA0.225Cs0.432Sn0.772Ge0.228I2.892Br0.108 | 1.3409 |
| Cs0.251FA0.425MA0.324Sn0.848Ge0.152I2.868Br0.132 | 1.3409 |
| MA0.368FA0.418Cs0.214Sn0.944Pd0.056Br0.289I2.711 | 1.3390 |
| Cs0.095MA0.744FA0.162Sn0.913Ge0.087I2.496Br0.504 | 1.3390 |
| Cs0.177MA0.73FA0.094Sn0.873Pd0.127I2.965Br0.035  | 1.3410 |
| MA0.195FA0.398Cs0.407Sn0.803Pd0.198Br0.055I2.945 | 1.3410 |
| FA0.209MA0.5Cs0.292Sn0.749Cr0.252Br0.018I2.982   | 1.3410 |
| FA0.413MA0.254Cs0.333Sn0.997Sr0.002I2.633Br0.367 | 1.3410 |
| MA0.201FA0.408Cs0.391Sn0.832Pd0.168Br0.083I2.917 | 1.3410 |

Table S10 Searched candidates for 1.67 eV.

| <b>Triple divalent cations HOIP candidate</b>           | <b>Predicted bandgap</b> |
|---------------------------------------------------------|--------------------------|
| FA0.016Cs0.392MA0.592Cr0.383Sr0.347Sn0.27Br1.171I1.829  | 1.6702                   |
| Cs0.445FA0.161MA0.394Pd0.508Cr0.228Sn0.263Br1.094I1.906 | 1.6693                   |
| FA0.057Cs0.789MA0.153Pd0.363Sn0.144Ca0.493Br0.88I2.12   | 1.671                    |
| FA0.355Cs0.322MA0.323Ca0.159Pd0.354Sn0.487I2.014Br0.986 | 1.6714                   |
| FA0.386MA0.221Cs0.393Sr0.333Sn0.351Pd0.315Br1.337I1.663 | 1.6715                   |
| MA0.25Cs0.538FA0.212Sn0.198Sr0.341Pd0.461I.823Br1.177   | 1.6685                   |
| FA0.381Cs0.582MA0.037Pd0.497Sn0.319Sr0.184I2.046Br0.954 | 1.6685                   |
| FA0.017Cs0.436MA0.547Cr0.063Sr0.168Sn0.769I1.595Br1.405 | 1.6683                   |
| Cs0.437MA0.007FA0.557Cr0.361Sn0.4Ge0.239I2.175Br0.825   | 1.668                    |
| Cs0.424MA0.392FA0.184Ge0.162Sr0.626Ca0.212Br0.921I2.079 | 1.6673                   |
| Cs0.296MA0.136FA0.567Ca0.353Sr0.466Sn0.181Br1.297I1.703 | 1.6672                   |
| FA0.421Cs0.165MA0.414Sn0.137Sr0.465Ca0.398I1.708Br1.292 | 1.6671                   |
| Cs0.292FA0.159MA0.549Pd0.215Ca0.514Sn0.271I2.257Br0.743 | 1.6666                   |
| FA0.315Cs0.388MA0.297Ca0.222Pd0.363Sn0.415I1.896Br1.104 | 1.6734                   |
| Cs0.311MA0.406FA0.284Sr0.563Sn0.358Pd0.079I1.418Br1.582 | 1.6665                   |
| Cs0.652MA0.084FA0.264Sr0.638Ge0.151Cr0.211I2.336Br0.664 | 1.6664                   |
| FA0.162MA0.342Cs0.497Cr0.36Ge0.28Sn0.361I.721Br1.279    | 1.6658                   |
| Cs0.853MA0.049FA0.098Sr0.677Sn0.063Cr0.26I2.365Br0.635  | 1.6657                   |
| MA0.501Cs0.192FA0.307Sn0.315Pd0.299Sr0.387I1.597Br1.403 | 1.6656                   |
| FA0.367Cs0.525MA0.108Sr0.098Cr0.351Sn0.551I1.798Br1.202 | 1.6655                   |

|                                                         |        |
|---------------------------------------------------------|--------|
| MA0.27Cs0.518FA0.212Sn0.209Cr0.331Pd0.46I1.746Br1.254   | 1.6654 |
| FA0.241Cs0.485MA0.274Cr0.095Sr0.218Sn0.687I1.614Br1.386 | 1.6654 |
| FA0.42Cs0.482MA0.099Sr0.169Cr0.322Sn0.509I1.805Br1.195  | 1.6653 |
| FA0.078Cs0.495MA0.427Ge0.333Pd0.294Sr0.374I2.907Br0.093 | 1.6651 |
| MA0.191FA0.229Cs0.58Ge0.179Sn0.467Ca0.355I2.003Br0.997  | 1.6752 |
| MA0.43Cs0.383FA0.187Ge0.246Sr0.339Ca0.415I2.151Br0.849  | 1.6756 |
| FA0.184Cs0.589MA0.227Ge0.038Cr0.222Ca0.739I2.443Br0.557 | 1.6758 |
| MA0.094FA0.478Cs0.428Ca0.312Sn0.399Cr0.289Br0.568I2.432 | 1.6637 |
| MA0.253FA0.408Cs0.339Ge0.328Pd0.062Sr0.609I2.654Br0.346 | 1.6634 |
| Cs0.405MA0.115FA0.481Cr0.356Sn0.383Ge0.26I2.758Br0.242  | 1.6633 |
| Cs0.837MA0.074FA0.089Sr0.608Ge0.23Pd0.162I2.995Br0.005  | 1.6631 |
| Cs0.245FA0.12MA0.635Sn0.48Pd0.436Sr0.084I2.147Br0.853   | 1.6629 |
| FA0.316Cs0.511MA0.173Ca0.266Cr0.365Sn0.37I1.964Br1.036  | 1.6629 |
| MA0.489FA0.116Cs0.395Sr0.89Pd0.002Ge0.108Br1.063I1.937  | 1.6774 |
| MA0.273Cs0.496FA0.231Sn0.187Sr0.379Pd0.435I1.927Br1.073 | 1.662  |
| Cs0.795MA0.094FA0.111Sr0.658Pd0.272Ge0.069I2.581Br0.419 | 1.6619 |
| MA0.366Cs0.494FA0.139Pd0.136Sr0.491Sn0.372I1.454Br1.546 | 1.6782 |
| Cs0.658MA0.1FA0.242Pd0.325Sr0.273Sn0.402I2.032Br0.968   | 1.6786 |
| MA0.124FA0.378Cs0.498Ca0.213Sn0.639Sr0.148Br1.457I1.543 | 1.6787 |
| FA0.057Cs0.658MA0.285Ge0.388Sr0.358Ca0.254I2.417Br0.583 | 1.6788 |
| MA0.402FA0.241Cs0.356Sr0.24Sn0.263Ca0.497Br1.354I1.646  | 1.6789 |
| FA0.382Cs0.504MA0.114Sr0.136Cr0.422Sn0.442I1.701Br1.299 | 1.661  |
| FA0.3Cs0.518MA0.182Sr0.112Cr0.266Sn0.622I1.852Br1.148   | 1.6609 |
| FA0.003Cs0.798MA0.199Pd0.369Sn0.151Ca0.48Br0.981I2.019  | 1.6793 |
| FA0.088Cs0.821MA0.091Ge0.376Sn0.44Sr0.184I1.997Br1.003  | 1.6799 |

| <b>Double divalent cations HOIP candidate</b>    | <b>Predicted bandgap (eV)</b> |
|--------------------------------------------------|-------------------------------|
| MA0.126FA0.495Cs0.379Ca0.357Sn0.643Br1.367I1.633 | 1.6701                        |
| MA0.215Cs0.526FA0.259Sr0.603Sn0.396I1.635Br1.365 | 1.6696                        |
| MA0.329FA0.149Cs0.522Sn0.307Sr0.694Br1.338I1.662 | 1.6694                        |
| MA0.17FA0.451Cs0.379Ca0.438Sn0.562Br1.342I1.658  | 1.6694                        |
| MA0.343Cs0.498FA0.159Sn0.543Sr0.458I1.672Br1.328 | 1.6693                        |
| MA0.365Cs0.507FA0.129Sn0.562Sr0.437I1.583Br1.417 | 1.6686                        |
| MA0.201Cs0.547FA0.252Sr0.619Sn0.381I1.62Br1.38   | 1.6679                        |
| MA0.358Cs0.492FA0.15Sn0.514Sr0.486I1.575Br1.425  | 1.6677                        |
| MA0.257Cs0.436FA0.308Pd0.277Sn0.723I1.28Br1.72   | 1.6732                        |
| Cs0.78FA0.017MA0.203Sr0.576Ge0.425Br0.582I2.418  | 1.6665                        |
| Cs0.428MA0.571FA0.001Sr0.847Sn0.153I1.826Br1.174 | 1.6665                        |
| MA0.404FA0.06Cs0.537Sn0.459Cr0.541Br1.759I1.241  | 1.6663                        |
| MA0.355Cs0.614FA0.031Sn0.524Sr0.476I1.734Br1.266 | 1.6658                        |
| MA0.197FA0.384Cs0.42Cr0.255Sn0.745Br1.876I1.124  | 1.6657                        |
| MA0.034Cs0.323FA0.643Sn0.694Cr0.306I1.34Br1.66   | 1.6752                        |
| Cs0.763FA0.021MA0.216Sr0.58Ge0.42Br0.388I2.612   | 1.6644                        |
| Cs0.374MA0.491FA0.135Sn0.212Sr0.788I1.855Br1.145 | 1.6644                        |

|                                                  |        |
|--------------------------------------------------|--------|
| Cs0.715MA0.034FA0.252Sr0.576Ge0.424Br0.644I2.356 | 1.6762 |
| Cs0.419MA0.228FA0.353Sn0.613Ge0.387I2.139Br0.861 | 1.6634 |
| FA0.217MA0.21Cs0.572Sn0.651Sr0.349Br1.382I1.618  | 1.6631 |
| MA0.186Cs0.606FA0.208Ca0.677Ge0.323I2.901Br0.099 | 1.6776 |
| FA0.311Cs0.629MA0.06Sr0.153Sn0.847I1.672Br1.328  | 1.6777 |
| Cs0.544MA0.165FA0.291Sn0.712Sr0.288I1.915Br1.085 | 1.6622 |
| Cs0.433FA0.325MA0.242Sn0.344Cr0.656I2.984Br0.016 | 1.6779 |
| FA0.177Cs0.375MA0.448Ca0.742Sn0.258Br1.378I1.622 | 1.6782 |
| MA0.319Cs0.424FA0.257Sn0.662Sr0.339I1.578Br1.422 | 1.6785 |
| MA0.165Cs0.527FA0.309Sn0.617Sr0.383I1.666Br1.334 | 1.6787 |
| MA0.161FA0.49Cs0.349Ca0.49Sn0.509Br1.508I1.492   | 1.6787 |
| Cs0.557FA0.05MA0.393Sr0.545Sn0.455Br1.4I1.6      | 1.6611 |
| Cs0.973FA0.024MA0.003Sr0.584Ge0.416Br0.354I2.646 | 1.6607 |
| MA0.371Cs0.624FA0.005Sn0.524Sr0.476I1.602Br1.398 | 1.6794 |
| MA0.243Cs0.618FA0.138Sn0.368Sr0.632Br1.415I1.585 | 1.6603 |
| Cs0.925MA0.002FA0.072Sr0.726Ge0.274I2.996Br0.004 | 1.6602 |
| FA0.28Cs0.483MA0.238Sn0.602Ca0.399I1.5Br1.5      | 1.6798 |
| MA0.425Cs0.521FA0.054Sn0.51Sr0.49I1.586Br1.414   | 1.66   |

Table S11 Searched candidates for 1.2 eV.

| Double divalent cations HOIP candidate | Predicted bandgap (eV) |
|----------------------------------------|------------------------|
| MA0.815FA0.185Ge0.073Sn0.927I3.0       | 1.2190                 |
| FA0.145MA0.856Ge0.074Sn0.925I3.0       | 1.2191                 |
| MA0.86FA0.139Sn0.914Ge0.086I3.0        | 1.2227                 |
| MA0.851FA0.149Sn0.92Ge0.08I3.0         | 1.2235                 |
| MA0.851FA0.148Sn0.984Ge0.017I3.0       | 1.2263                 |
| MA0.859FA0.141Sn0.986Ge0.015I3.0       | 1.2264                 |
| MA0.86FA0.139Sn0.987Ge0.014I3.0        | 1.2265                 |
| MA0.862FA0.138Sn0.988Ge0.013I3.0       | 1.2266                 |
| MA0.858FA0.142Sn0.987Ge0.014I3.0       | 1.2266                 |
| MA0.861FA0.139Sn0.987Ge0.014I3.0       | 1.2266                 |
| MA0.851FA0.149Ge0.012Sn0.989I3.0       | 1.2266                 |
| MA0.855FA0.145Ge0.013Sn0.988I3.0       | 1.2266                 |
| MA0.852FA0.148Ge0.013Sn0.988I3.0       | 1.2266                 |
| MA0.858FA0.142Ge0.012Sn0.989I3.0       | 1.2266                 |
| MA0.861FA0.139Sn0.988Ge0.013I3.0       | 1.2266                 |
| MA0.848FA0.151Sn0.987Ge0.014I3.0       | 1.2267                 |
| MA0.781FA0.22Sn0.976Ge0.024I3.0        | 1.2276                 |
| MA0.78FA0.221Sn0.975Ge0.025I3.0        | 1.2276                 |
| MA0.777FA0.224Ge0.024Sn0.976I3.0       | 1.2277                 |
| MA0.788FA0.213Sn0.975Ge0.025I3.0       | 1.2279                 |
| MA0.782FA0.219Sn0.976Ge0.024I3.0       | 1.2279                 |
| MA0.784FA0.217Sn0.975Ge0.025I3.0       | 1.2279                 |
| MA0.782FA0.219Ge0.025Sn0.975I3.0       | 1.2279                 |

|                                  |        |
|----------------------------------|--------|
| FA0.515Cs0.486Sn0.952Ge0.047I3.0 | 1.2293 |
| Cs0.486FA0.515Ge0.051Sn0.948I3.0 | 1.2293 |
| MA0.823FA0.176Sn0.989Ge0.012I3.0 | 1.2295 |
| FA0.516Cs0.485Ge0.048Sn0.952I3.0 | 1.2299 |

Table S12 Predictions for the candidates from ref<sup>41</sup>

| Formula | Bandgap (eV) | $\tau_f$ | $O_f$ | $t_f$ |
|---------|--------------|----------|-------|-------|
| ASnI3   | 1.2864       | 4.162    | 0.523 | 0.871 |
| AGSnI3  | 1.2894       | 3.828    | 0.523 | 0.939 |
| XQSnI3  | 1.2994       | 3.884    | 0.523 | 0.923 |
| ATmI3   | 1.3506       | 4.124    | 0.468 | 0.903 |
| MASmI3  | 1.3584       | 3.748    | 0.555 | 0.939 |
| AGSmI3  | 1.3850       | 3.816    | 0.555 | 0.92  |
| XQTmI3  | 1.3867       | 3.963    | 0.468 | 0.957 |
| XQSmI3  | 1.3879       | 3.891    | 0.555 | 0.904 |
| ASmI3   | 1.3918       | 4.263    | 0.555 | 0.853 |
| AGTmI3  | 1.4048       | 3.931    | 0.468 | 0.974 |
| AYbI3   | 1.4335       | 4.128    | 0.464 | 0.906 |
| AGEuI3  | 1.4420       | 3.821    | 0.532 | 0.934 |
| MAEuI3  | 1.4538       | 3.765    | 0.532 | 0.953 |
| AEuI3   | 1.4562       | 4.184    | 0.532 | 0.866 |
| XQEuI3  | 1.4591       | 3.882    | 0.532 | 0.917 |
| XQYbI3  | 1.4782       | 3.975    | 0.464 | 0.96  |
| AGSrI3  | 1.5007       | 3.818    | 0.536 | 0.931 |
| ACaI3   | 1.5067       | 4.139    | 0.455 | 0.912 |
| XQSrI3  | 1.5217       | 3.882    | 0.536 | 0.914 |
| AScI3   | 1.5222       | 4.675    | 0.339 | 0.99  |
| AGYbI3  | 1.5256       | 3.945    | 0.464 | 0.977 |
| ASrI3   | 1.5269       | 4.198    | 0.536 | 0.863 |
| XQCaI3  | 1.5521       | 4.001    | 0.455 | 0.966 |
| MATmI3  | 1.5748       | 3.904    | 0.468 | 0.994 |
| ANbI3   | 1.6656       | 4.774    | 0.327 | 0.999 |
| MAYbI3  | 1.6839       | 3.92     | 0.464 | 0.997 |
| XQTiI3  | 1.7123       | 4.284    | 0.391 | 1.01  |
| AASmI3  | 1.7285       | 3.906    | 0.555 | 0.901 |
| AGCaI3  | 1.7294       | 3.974    | 0.455 | 0.983 |
| AMgI3   | 1.7704       | 4.774    | 0.327 | 0.999 |
| AGTiI3  | 1.8425       | 3.999    | 0.439 | 1.056 |
| AGScI3  | 1.8717       | 4.363    | 0.38  | 1.101 |
| MAScI3  | 1.8972       | 4.697    | 0.339 | 1.09  |
| AASnI3  | 1.9007       | 3.895    | 0.523 | 0.92  |
| AZrI3   | 1.9103       | 5.081    | 0.301 | 1.077 |
| ASmF3   | 1.9188       | 3.55     | 0.917 | 0.903 |
| XQScI3  | 1.9255       | 4.678    | 0.339 | 1.05  |

|         |        |       |       |       |
|---------|--------|-------|-------|-------|
| AGZrI3  | 1.9400 | 4.103 | 0.444 | 1.319 |
| XQZrI3  | 1.9735 | 5.553 | 0.268 | 1.1   |
| ATmBr3  | 1.9825 | 3.891 | 0.526 | 0.919 |
| ASnF3   | 1.9827 | 3.406 | 0.865 | 0.928 |
| AGMgI3  | 1.9849 | 4.465 | 0.367 | 1.111 |
| AATmI3  | 1.9909 | 3.969 | 0.468 | 0.954 |
| ASnBr3  | 1.9916 | 3.953 | 0.587 | 0.883 |
| AGNbI3  | 2.0059 | 4.465 | 0.367 | 1.111 |
| AGNbI3  | 2.0059 | 3.62  | 0.541 | 1.293 |
| XQSnBr3 | 2.0097 | 3.675 | 0.587 | 0.939 |
| AAScI3  | 2.0180 | 4.354 | 0.38  | 1.076 |
| MANbI3  | 2.0182 | 4.813 | 0.327 | 1.1   |
| AATiI3  | 2.0199 | 4.286 | 0.391 | 1.007 |
| AGSnBr3 | 2.0236 | 3.619 | 0.587 | 0.957 |
| ATiBr3  | 2.0257 | 4.057 | 0.439 | 0.974 |
| XQMgI3  | 2.0262 | 4.788 | 0.327 | 1.058 |
| XQNbI3  | 2.0366 | 4.788 | 0.327 | 1.058 |
| AAEuI3  | 2.0524 | 3.894 | 0.532 | 0.914 |
| AGTmBr3 | 2.0542 | 3.698 | 0.526 | 0.996 |
| AASrI3  | 2.0558 | 3.895 | 0.536 | 0.911 |
| AScF3   | 2.0576 | 3.507 | 0.56  | 1.109 |
| ASmBr3  | 2.0610 | 4.066 | 0.622 | 0.864 |
| XQTmBr3 | 2.0620 | 3.73  | 0.526 | 0.977 |
| XQSmBr3 | 2.0649 | 3.694 | 0.622 | 0.919 |
| AAZrI3  | 2.0715 | 4.888 | 0.326 | 1.169 |
| AAybI3  | 2.0732 | 3.981 | 0.464 | 0.957 |
| XQSrBr3 | 2.0752 | 3.679 | 0.602 | 0.93  |
| ACaBr3  | 2.0761 | 3.899 | 0.51  | 0.928 |
| AMgF3   | 2.0786 | 3.566 | 0.541 | 1.123 |
| XBNbI3  | 2.0846 | 4.832 | 0.327 | 1.124 |
| AGSmBr3 | 2.0869 | 3.619 | 0.622 | 0.936 |
| ASrBr3  | 2.0926 | 3.994 | 0.602 | 0.875 |
| AACaI3  | 2.1017 | 4.006 | 0.455 | 0.963 |
| AGSrBr3 | 2.1076 | 3.615 | 0.602 | 0.948 |
| AEuBr3  | 2.1088 | 3.979 | 0.597 | 0.878 |
| AYbBr3  | 2.1102 | 3.893 | 0.52  | 0.922 |
| MASmBr3 | 2.1112 | 3.551 | 0.622 | 0.956 |
| MAEuBr3 | 2.1166 | 3.56  | 0.597 | 0.972 |
| XQEuBr3 | 2.1167 | 3.677 | 0.597 | 0.933 |
| AAMgI3  | 2.1251 | 4.453 | 0.367 | 1.086 |
| AASnF3  | 2.1285 | 3.139 | 0.865 | 0.994 |
| XQSnF3  | 2.1317 | 3.127 | 0.865 | 0.998 |
| ASrF3   | 2.1327 | 3.46  | 0.887 | 0.917 |
| AANbI3  | 2.1345 | 4.453 | 0.367 | 1.086 |

|         |        |       |       |       |
|---------|--------|-------|-------|-------|
| AGEuBr3 | 2.1366 | 3.616 | 0.597 | 0.951 |
| XQSmF3  | 2.1416 | 3.178 | 0.917 | 0.971 |
| AASmF3  | 2.1505 | 3.193 | 0.917 | 0.967 |
| FANbI3  | 2.1541 | 3.627 | 0.541 | 1.305 |
| AATiF3  | 2.1545 | 3.274 | 0.647 | 1.126 |
| AGScBr3 | 2.1569 | 4.162 | 0.412 | 1.124 |
| XQCaBr3 | 2.1576 | 3.761 | 0.51  | 0.987 |
| ANbF3   | 2.1580 | 3.566 | 0.541 | 1.123 |
| XQTiF3  | 2.1586 | 3.273 | 0.647 | 1.13  |
| AATmF3  | 2.1679 | 3.125 | 0.774 | 1.045 |
| AGSnF3  | 2.1685 | 3.071 | 0.865 | 1.021 |
| AGMgBr3 | 2.1687 | 4.257 | 0.398 | 1.135 |
| XQMgBr3 | 2.1695 | 4.454 | 0.367 | 1.09  |
| AMgBr3  | 2.1711 | 4.441 | 0.367 | 1.025 |
| AScBr3  | 2.1818 | 4.353 | 0.38  | 1.016 |
| AEuF3   | 2.1819 | 3.441 | 0.88  | 0.921 |
| AZrBr3  | 2.1880 | 4.827 | 0.326 | 1.1   |
| MAScBr3 | 2.1933 | 4.375 | 0.38  | 1.124 |
| AGTiBr3 | 2.1944 | 3.825 | 0.475 | 1.075 |
| AACaF3  | 2.1954 | 3.136 | 0.752 | 1.058 |
| AGSmF3  | 2.1959 | 3.103 | 0.917 | 0.993 |
| MACaF3  | 2.2007 | 3.082 | 0.752 | 1.114 |
| AASrF3  | 2.2010 | 3.158 | 0.887 | 0.982 |
| ATmF3   | 2.2020 | 3.28  | 0.774 | 0.975 |
| AAMgBr3 | 2.2027 | 4.244 | 0.398 | 1.109 |
| AAScBr3 | 2.2158 | 4.153 | 0.412 | 1.098 |
| MATmF3  | 2.2162 | 3.06  | 0.774 | 1.1   |
| AATiBr3 | 2.2165 | 4.007 | 0.439 | 1.032 |
| XQScBr3 | 2.2225 | 4.355 | 0.38  | 1.08  |
| MATmBr3 | 2.2244 | 3.671 | 0.526 | 1.017 |
| AGNbBr3 | 2.2291 | 4.257 | 0.398 | 1.135 |
| XQTiBr3 | 2.2298 | 4.005 | 0.439 | 1.036 |
| ATiF3   | 2.2382 | 3.324 | 0.647 | 1.051 |
| AAZrBr3 | 2.2384 | 4.074 | 0.444 | 1.284 |
| AGCaBr3 | 2.2454 | 3.734 | 0.51  | 1.006 |
| AAEuF3  | 2.2493 | 3.151 | 0.88  | 0.986 |
| MASnF3  | 2.2507 | 3.777 | 0.523 | 0.958 |
| AAybF3  | 2.2509 | 3.128 | 0.767 | 1.049 |
| ASnCl3  | 2.2520 | 3.823 | 0.635 | 0.892 |
| XQYbBr3 | 2.2573 | 3.739 | 0.52  | 0.98  |
| ACaF3   | 2.2622 | 3.269 | 0.752 | 0.988 |
| ANbBr3  | 2.2630 | 4.441 | 0.367 | 1.025 |
| MASmF3  | 2.2650 | 3.035 | 0.917 | 1.018 |
| AGSrF3  | 2.2676 | 3.081 | 0.887 | 1.009 |



|         |        |       |       |       |
|---------|--------|-------|-------|-------|
| AGYbBr3 | 2.2684 | 3.71  | 0.52  | 0.999 |
| AScCl3  | 2.2696 | 4.151 | 0.412 | 1.034 |
| AGEuF3  | 2.2738 | 3.077 | 0.88  | 1.013 |
| AMgCl3  | 2.2819 | 4.233 | 0.398 | 1.044 |
| AGTiCl3 | 2.2826 | 3.267 | 0.647 | 1.156 |
| AGCaF3  | 2.2849 | 3.104 | 0.752 | 1.087 |
| XQNbBr3 | 2.2864 | 4.454 | 0.367 | 1.09  |
| MANbBr3 | 2.2901 | 4.48  | 0.367 | 1.135 |
| AGScCl3 | 2.2929 | 3.518 | 0.56  | 1.22  |
| ATiCl3  | 2.2944 | 3.883 | 0.475 | 0.989 |
| AZrCl3  | 2.2949 | 4.013 | 0.444 | 1.199 |
| AGTmF3  | 2.2959 | 3.087 | 0.774 | 1.073 |
| MAYbF3  | 2.2998 | 3.067 | 0.767 | 1.104 |
| AATmBr3 | 2.3010 | 3.736 | 0.526 | 0.974 |
| AGMgCl3 | 2.3052 | 3.59  | 0.541 | 1.235 |
| XQCaF3  | 2.3086 | 3.131 | 0.752 | 1.062 |
| XQTmF3  | 2.3119 | 3.118 | 0.774 | 1.049 |
| XQSrF3  | 2.3152 | 3.145 | 0.887 | 0.986 |
| XQScCl3 | 2.3176 | 4.154 | 0.412 | 1.102 |
| AATiCl3 | 2.3177 | 3.832 | 0.475 | 1.051 |
| AASeCl3 | 2.3182 | 3.509 | 0.56  | 1.188 |
| XQTiCl3 | 2.3190 | 3.831 | 0.475 | 1.054 |
| AAMgCl3 | 2.3227 | 3.578 | 0.541 | 1.203 |
| XQMgCl3 | 2.3251 | 4.246 | 0.398 | 1.113 |
| MASrF3  | 2.3307 | 3.023 | 0.887 | 1.034 |
| AACaBr3 | 2.3384 | 3.766 | 0.51  | 0.983 |
| ATmCl3  | 2.3401 | 3.746 | 0.569 | 0.93  |
| ASmCl3  | 2.3483 | 3.943 | 0.674 | 0.872 |
| AANbBr3 | 2.3501 | 4.244 | 0.398 | 1.109 |
| AGYbF3  | 2.3598 | 3.092 | 0.767 | 1.077 |
| AYbF3   | 2.3701 | 3.275 | 0.767 | 0.979 |
| XQSnCl3 | 2.3706 | 3.545 | 0.635 | 0.951 |
| ANbCl3  | 2.3730 | 4.233 | 0.398 | 1.044 |
| XQSmCl3 | 2.3733 | 3.571 | 0.674 | 0.929 |
| XQEuF3  | 2.3736 | 3.138 | 0.88  | 0.99  |
| MAYbBr3 | 2.3750 | 3.684 | 0.52  | 1.02  |
| AGNbCl3 | 2.3753 | 3.59  | 0.541 | 1.235 |
| AGCaCl3 | 2.3854 | 3.584 | 0.552 | 1.022 |
| XQYbF3  | 2.3929 | 3.122 | 0.767 | 1.053 |
| AGTmCl3 | 2.3960 | 3.553 | 0.569 | 1.011 |
| MAEuF3  | 2.4035 | 3.022 | 0.88  | 1.038 |
| ACaCl3  | 2.4182 | 3.749 | 0.552 | 0.94  |
| AANbCl3 | 2.4239 | 3.578 | 0.541 | 1.203 |
| MATmCl3 | 2.4412 | 3.526 | 0.569 | 1.033 |

|         |        |       |       |       |
|---------|--------|-------|-------|-------|
| XQNbCl3 | 2.4470 | 4.246 | 0.398 | 1.113 |
| AGYbCl3 | 2.4524 | 3.563 | 0.564 | 1.015 |
| AATmCl3 | 2.4559 | 3.591 | 0.569 | 0.988 |
| AACaCl3 | 2.4597 | 3.616 | 0.552 | 0.998 |
| XQCaCl3 | 2.4665 | 3.611 | 0.552 | 1.002 |
| XQTmCl3 | 2.4732 | 3.584 | 0.569 | 0.991 |
| ASrCl3  | 2.4733 | 3.867 | 0.652 | 0.883 |
| AAyBr3  | 2.4961 | 3.745 | 0.52  | 0.977 |
| AAyCl3  | 2.5073 | 3.598 | 0.564 | 0.991 |
| AyCl3   | 2.5105 | 3.746 | 0.564 | 0.933 |
| AGSnCl3 | 2.5318 | 3.489 | 0.635 | 0.97  |
| AEuCl3  | 2.5444 | 3.851 | 0.646 | 0.886 |
| AASnBr3 | 2.5577 | 3.687 | 0.587 | 0.936 |
| XQsrCl3 | 2.5628 | 3.552 | 0.652 | 0.941 |
| AGSmCl3 | 2.5693 | 3.496 | 0.674 | 0.948 |
| MAYbCl3 | 2.5957 | 3.537 | 0.564 | 1.037 |
| XQYbCl3 | 2.6447 | 3.592 | 0.564 | 0.995 |
| AASnCl3 | 2.6492 | 3.556 | 0.635 | 0.948 |
| XQEuCl3 | 2.6625 | 3.549 | 0.646 | 0.945 |
| AGSrCl3 | 2.6785 | 3.488 | 0.652 | 0.96  |
| AASmCl3 | 2.6810 | 3.587 | 0.674 | 0.926 |
| AASmBr3 | 2.6977 | 3.709 | 0.622 | 0.915 |
| AASrBr3 | 2.7253 | 3.692 | 0.602 | 0.927 |
| MASmCl3 | 2.7719 | 3.428 | 0.674 | 0.969 |
| AASrCl3 | 2.7744 | 3.565 | 0.652 | 0.938 |
| AGEuCl3 | 2.7978 | 3.487 | 0.646 | 0.964 |
| AAEuCl3 | 2.8295 | 3.561 | 0.646 | 0.941 |
| AAEuBr3 | 2.8484 | 3.689 | 0.597 | 0.93  |
| MAEuCl3 | 3.0856 | 3.432 | 0.646 | 0.985 |

---

## Section S3 Experimental Validation

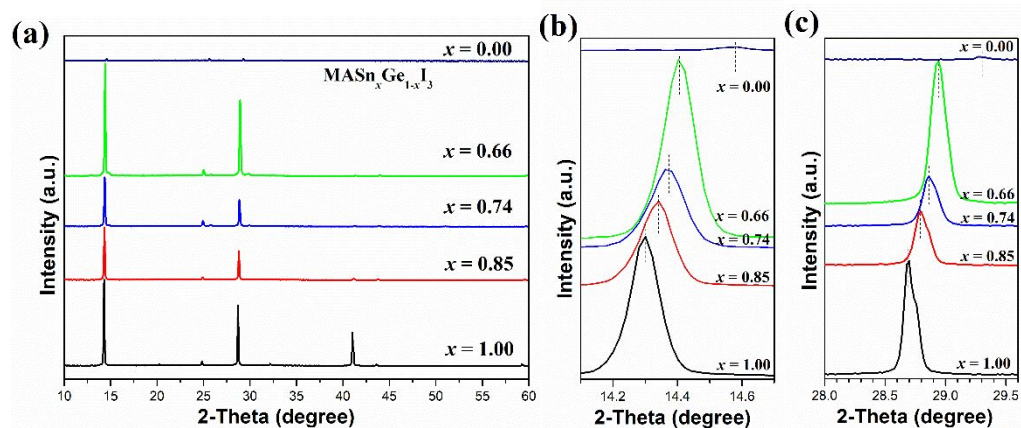

Figure S24 XRD patterns of (a)  $\text{MASn}_x\text{Ge}_{1-x}\text{I}_3$  ( $x=1, 0.85, 0.74, 0.66, 0$ ) and partial enlarged plots around (b)  $14.30^\circ$  and (c)  $28.70^\circ$  of 2-Theta.

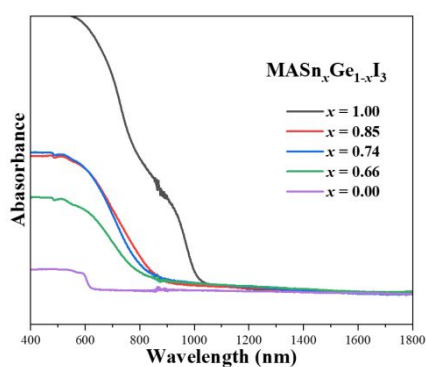

Figure S25 Absorbance spectra of  $\text{MASn}_x\text{Ge}_{1-x}\text{I}_3$  ( $x=1, 0.85, 0.74, 0.66, 0$ ).

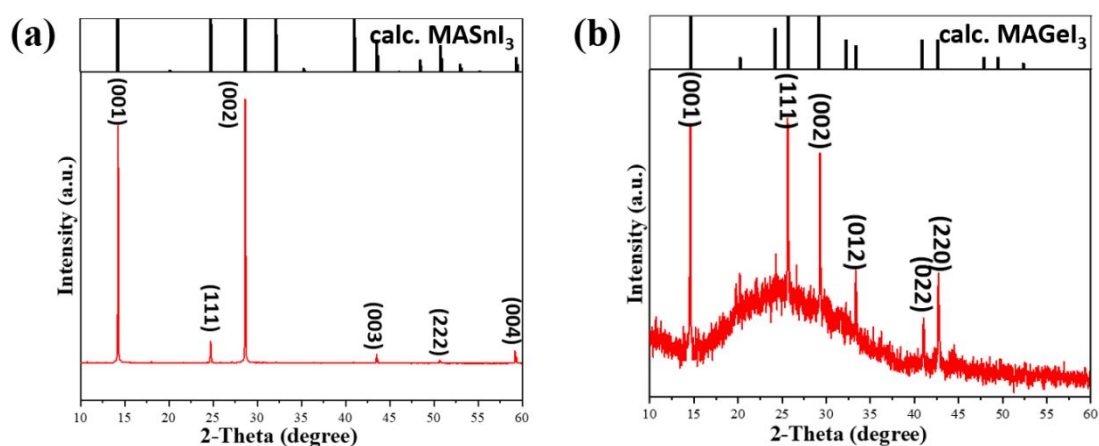

Figure S26 XRD patterns of (a)  $\text{MASnI}_3$  and (b)  $\text{MAGeI}_3$ . The diffraction peaks of  $\text{MASnI}_3$  and  $\text{MAGeI}_3$  prepared are consistent with the theoretical values, corresponding to the cubic structure (space group:  $\text{Pm}\bar{3}\text{m}$ ) and tetragonal structure (space group:  $\text{P4mm}$ ), respectively.

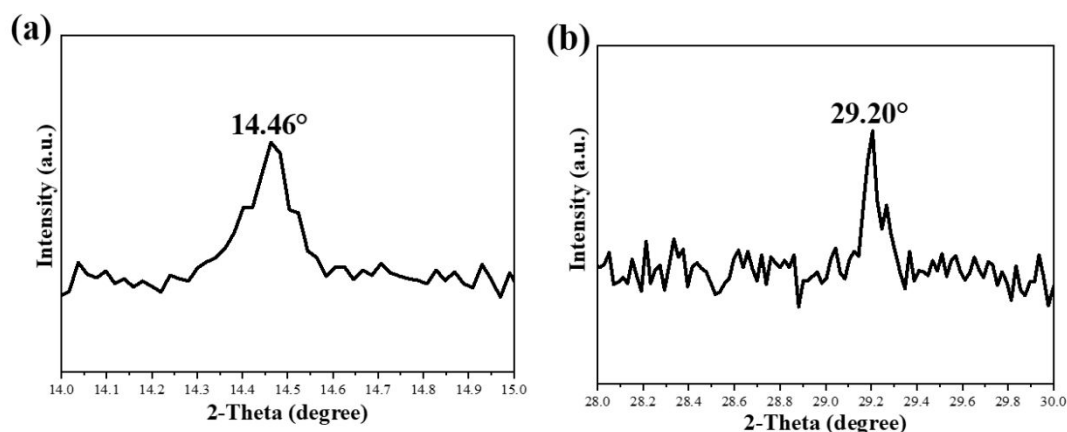

Figure S27 Diffraction peaks of  $\text{MAGeI}_3$  at (a)  $14.46^\circ$  and (b)  $29.20^\circ$  of 2-Theta.

### Experimental

Methylammonium iodide (MAI, 99.8%) was purchased from GreatCell. Tin (II) iodide ( $\text{SnI}_2$ , 99.99%) and tin (II) fluoride ( $\text{SnF}_2$ , 99%) were purchased from Sigma-Aldrich. N, N-dimethylformamide (DMF, 99.8%) and dimethylsulfoxide (DMSO, 99.9%) were purchased from Admas-beta. Germanium powder (Ge, 99.999%) and iodine pellets ( $\text{I}_2$ , 99.999%) were purchased from Aladdin and Admas-beta, respectively. All the above materials were used as received.  $\text{GeI}_2$  was synthesized by sintering a sealed quartz tube containing equimolar amounts of germanium powder and iodine pellets at  $600^\circ\text{C}$  for 10 hours. The  $\text{MASnI}_3$  precursor solution was prepared by dissolving 15.9 mg MAI, 37.2 mg  $\text{SnI}_2$  and 3.13 mg  $\text{SnF}_2$  additives in a mixed solvent of 100  $\mu\text{L}$  DMF and 25  $\mu\text{L}$  DMSO while stirring at  $60^\circ\text{C}$  for 2 hours. The  $\text{MAGeI}_3$  precursor solution was prepared by dissolving 15.9 mg MAI and 32.6 mg  $\text{GeI}_2$  in a solvent of 125  $\mu\text{L}$  DMF while stirring at  $60^\circ\text{C}$  for 2 hours. The  $\text{MASn}_x\text{Ge}_{1-x}\text{I}_3$  ( $x=0.85, 0.74, 0.66$ ) precursor solution was prepared by dissolving 15.9 mg MAI and different molar ratios of  $\text{SnI}_2$  and  $\text{GeI}_2$  in a mixed solvent of 100  $\mu\text{L}$  DMF and 25  $\mu\text{L}$  DMSO while stirring at  $60^\circ\text{C}$  for 2 hours. The  $\text{MASnI}_3$ ,  $\text{MAGeI}_3$  and  $\text{MASn}_x\text{Ge}_{1-x}\text{I}_3$  films were deposited by spin-coating the precursor solution onto a glass substrate at 1000-4000 rpm for 45 s in a glove box. All the films were annealed at  $100^\circ\text{C}$  for 10 minutes.

### Material Characterization:

The crystal structure of perovskite films was examined by a D2-phaser diffractometer from Bruker with a  $\text{CuK}\alpha$  radiation. The UV-Vis-IR measurement was performed using a Lambda 750 UV/Vis/NIR spectrophotometer from PerkinElmer. The optical band gap ( $E_g$ ) of the material was obtained using the following Tauc formula:

$$(\alpha h\nu)^\gamma = A(h\nu - E_g)$$

where  $\alpha$ ,  $h\nu$  and  $A$  are absorption coefficient, Planck's constant, the incident photon frequency and proportionality constant, respectively.  $\gamma$  represents the nature of the electronic transition and is equal to 2 for direct allowed transitions condition.

## References:

1. Villars, P. Materials Platform for Data Science. <https://mpds.io/> (accessed December).
2. Mentel, Ł. mendeleev -- A Python resource for properties of chemical elements, ions and isotopes. <https://github.com/lmmentel/mendeleev> (accessed December).
3. Frisch, M. J.; Trucks, G. W.; Schlegel, H. B.; Scuseria, G. E.; Robb, M. A.; Cheeseman, J. R.; Scalmani, G.; Barone, V.; Petersson, G. A.; Nakatsuji, H.; Li, X.; Caricato, M.; Marenich, A. V.; Bloino, J.; Janesko, B. G.; Gomperts, R.; Mennucci, B.; Hratchian, H. P.; Ortiz, J. V.; Izmaylov, A. F.; Sonnenberg, J. L.; Williams; Ding, F.; Lipparini, F.; Egidi, F.; Goings, J.; Peng, B.; Petrone, A.; Henderson, T.; Ranasinghe, D.; Zakrzewski, V. G.; Gao, J.; Rega, N.; Zheng, G.; Liang, W.; Hada, M.; Ehara, M.; Toyota, K.; Fukuda, R.; Hasegawa, J.; Ishida, M.; Nakajima, T.; Honda, Y.; Kitao, O.; Nakai, H.; Vreven, T.; Throssell, K.; Montgomery Jr., J. A.; Peralta, J. E.; Ogliaro, F.; Bearpark, M. J.; Heyd, J. J.; Brothers, E. N.; Kudin, K. N.; Staroverov, V. N.; Keith, T. A.; Kobayashi, R.; Normand, J.; Raghavachari, K.; Rendell, A. P.; Burant, J. C.; Iyengar, S. S.; Tomasi, J.; Cossi, M.; Millam, J. M.; Klene, M.; Adamo, C.; Cammi, R.; Ochterski, J. W.; Martin, R. L.; Morokuma, K.; Farkas, O.; Foresman, J. B.; Fox, D. J. *Gaussian 16 Rev. C.01*, Gaussian, Inc.: Wallingford, CT, 2016.
4. Lu, T.; Chen, F., Multiwfn: A multifunctional wavefunction analyzer. *J. Comput. Chem.* **2012**, *33* (5), 580-592.
5. Sánchez-Coronilla, A.; Navas, J.; Gallardo, J. J.; Martín, E. I.; De los Santos, D.; Hernández, N. C.; Alcántara, R.; Toledo, J. H.; Fernández-Lorenzo, C., Hybrid Perovskite, CH<sub>3</sub>NH<sub>3</sub>PbI<sub>3</sub>, for Solar Applications: An Experimental and Theoretical Analysis of Substitution in A and B Sites. *J. Nanomater.* **2017**, *2017*, 9768918.
6. Li, Z.; Najeeb, M. A.; Alves, L.; Sherman, A. Z.; Shekar, V.; Cruz Parrilla, P.; Pendleton, I. M.; Wang, W.; Nega, P. W.; Zeller, M.; Schrier, J.; Norquist, A. J.; Chan, E. M., Robot-Accelerated Perovskite Investigation and Discovery. *Chem. Mater.* **2020**, *32* (13), 5650-5663.
7. Lu, S.; Zhou, Q.; Ouyang, Y.; Guo, Y.; Li, Q.; Wang, J., Accelerated discovery of stable lead-free hybrid organic-inorganic perovskites via machine learning. *Nat. Commun.* **2018**, *9* (1), 3405.
8. Ramli, A.; Bakar, M. N. A.; Osman, N.; Ismail, W. I. N. W.; Sepeai, S., Characterization of novel nitrogen-less derived 2D hybrid perovskite of C<sub>6</sub>H<sub>8</sub>N<sub>2</sub>PbBr<sub>3</sub> as a light-harvesting material for perovskite solar cell application. *Mater. Lett.* **2018**, *227*, 62-65.
9. Laref, A.; Al-Enazi, M.; Al-Qahtani, H. R.; Laref, S.; Wu, X., Impact of fluorine on organic cation for determining the electronic and optical properties of CH<sub>3-x</sub>F<sub>x</sub>NH<sub>3</sub>PbI<sub>3</sub> (x = 0, 1, 2, 3) hybrid perovskites-based photovoltaic devices. *Sol. Energy* **2019**, *177*, 517-530.
10. Tsai, C.-M.; Lin, Y.-P.; Pola, M. K.; Narra, S.; Jokar, E.; Yang, Y.-W.; Diao, E. W.-G., Control of Crystal Structures and Optical Properties with Hybrid Formamidinium and 2-Hydroxyethylammonium Cations for Mesoscopic Carbon-Electrode Tin-Based Perovskite Solar Cells. *ACS Energy Lett.* **2018**, *3* (9), 2077-2085.
11. Kevorkyants, R.; Sboev, M. N.; Chizhov, Y. V., Hybrid organic-inorganic lead and tin halide perovskites with saturated heterocyclic cations (CH<sub>2</sub>)<sub>n</sub>NH<sub>2</sub><sup>+</sup> and (CH<sub>2</sub>)<sub>n</sub>OH<sup>+</sup>, (n=2–6): Ab initio study. *Comput. Mater. Sci.* **2017**, *138*, 99-104.
12. Kevorkyants, R.; Emeline, A. V.; Bahnemann, D. W., Novel hybrid semiconducting lead and tin halide perovskites with saturated heterocyclic cations (CH<sub>2</sub>)<sub>n</sub>PH<sub>2</sub><sup>+</sup> and (CH<sub>2</sub>)<sub>n</sub>SH<sup>+</sup>, (n=2–6): Ab initio study. *Mater. Chem. Phys.* **2019**, *229*, 387-391.

13. Yang, Q.; Wu, M.; Zeng, X. C., Constructing Stable and Potentially High-Performance Hybrid Organic-Inorganic Perovskites with “Unstable” Cations. *Research* **2020**, *2020*, 1986576.
14. Pedregosa, F.; Varoquaux, G.; Gramfort, A.; Michel, V.; Thirion, B.; Grisel, O.; Blondel, M.; Prettenhofer, P.; Weiss, R.; Dubourg, V.; Vanderplas, J.; Passos, A.; Cournapeau, D.; Brucher, M.; Perrot, M.; Duchesnay, E., Scikit-learn: Machine Learning in Python. *Journal of Machine Learning Research* **2011**, *12*, 2825--2830.
15. Harris, C. R.; Millman, K. J.; van der Walt, S. J.; Gommers, R.; Virtanen, P.; Cournapeau, D.; Wieser, E.; Taylor, J.; Berg, S.; Smith, N. J.; Kern, R.; Picus, M.; Hoyer, S.; van Kerkwijk, M. H.; Brett, M.; Haldane, A.; del Río, J. F.; Wiebe, M.; Peterson, P.; Gérard-Marchant, P.; Sheppard, K.; Reddy, T.; Weckesser, W.; Abbasi, H.; Gohlke, C.; Oliphant, T. E., Array programming with NumPy. *Nature* **2020**, *585* (7825), 357-362.
16. Komer, B.; Socastro, M. T.; Kim, W. *Hyperopt: Distributed Hyperparameter Optimization*, 0.2.5; 2012-2021.
17. Lundberg, S. M.; Erion, G.; Chen, H.; DeGrave, A.; Prutkin, J. M.; Nair, B.; Katz, R.; Himmelfarb, J.; Bansal, N.; Lee, S.-I., From local explanations to global understanding with explainable AI for trees. *Nat. Mach. Intell.* **2020**, *2* (1), 56-67.
18. (a) Ding, C.; Peng, H., MINIMUM REDUNDANCY FEATURE SELECTION FROM MICROARRAY GENE EXPRESSION DATA. *J. Bioinf. Comput. Biol.* **2005**, *03* (02), 185-205; (b) Hanchuan, P.; Fuhui, L.; Ding, C., Feature selection based on mutual information criteria of max-dependency, max-relevance, and min-redundancy. *IEEE TPAMI* **2005**, *27* (8), 1226-1238.
19. Dorogush, A. V.; Ershov, V.; Gulin, A. CatBoost: gradient boosting with categorical features support. <https://catboost.ai/docs> (accessed December).
20. Chen, T.; Guestrin, C. XGBoost: A Scalable Tree Boosting System. <https://xgboost.readthedocs.io/en/latest/install.html> (accessed December).
21. Guolin, K.; Qi, M.; Thomas, F.; Taifeng, W.; Wei, C.; Weidong, M.; Qiwei, Y.; Tieyan, L., LightGBM: A Highly Efficient Gradient Boosting Decision Tree. In *Advances in Neural Information Processing Systems 30 (NIPS 2017)*, Long Beach, CA, USA, 2017.
22. Friedman, J. H., Greedy Function Approximation: A Gradient Boosting Machine. *The Annals of Statistics* **2001**, *29* (5), 1189-1232.
23. Chang, C.; Lin, C., LIBSVM: A library for support vector machines. *ACM Trans. Intell. Syst. Technol.* **2011**, *2* (3), Article 27.
24. Wu, X.; Kumar, V.; Ross Quinlan, J.; Ghosh, J.; Yang, Q.; Motoda, H.; McLachlan, G. J.; Ng, A.; Liu, B.; Yu, P. S.; Zhou, Z.; Steinbach, M.; Hand, D. J.; Steinberg, D., Top 10 algorithms in data mining. *KAIS* **2008**, *14* (1), 1-37.
25. Goldstein, A.; Kapelner, A.; Bleich, J.; Pitkin, E., Peeking Inside the Black Box: Visualizing Statistical Learning with Plots of Individual Conditional Expectation. *arXiv* **2013**, arXiv:1309.6392.
26. Jerome, H. F., Greedy function approximation: A gradient boosting machine. *Ann. Stat* **2001**, *29* (5), 1189-1232.
27. (a) Kumawat, N. K.; Dey, A.; Kumar, A.; Gopinathan, S. P.; Narasimhan, K. L.; Kabra, D., Band Gap Tuning of CH<sub>3</sub>NH<sub>3</sub>Pb(Br<sub>1-x</sub>Cl<sub>x</sub>)<sub>3</sub> Hybrid Perovskite for Blue Electroluminescence. *ACS Appl. Mater. Interfaces* **2015**, *7* (24), 13119-13124; (b) Kumawat, N. K.; Tripathi, M. N.; Waghmare, U.; Kabra, D., Structural, Optical, and Electronic Properties of Wide Bandgap Perovskites: Experimental and Theoretical Investigations. *J. Phys. Chem. A* **2016**, *120* (22), 3917-3923; (c) Aharon, S.; Cohen, B. E.; Etgar, L., Hybrid Lead Halide Iodide and Lead Halide Bromide in Efficient Hole Conductor Free

Perovskite Solar Cell. *J. Phys. Chem. C* **2014**, *118* (30), 17160-17165; (d) Tu, Y.; Wu, J.; Lan, Z.; He, X.; Dong, J.; Jia, J.; Guo, P.; Lin, J.; Huang, M.; Huang, Y., Modulated CH<sub>3</sub>NH<sub>3</sub>PbI<sub>3</sub>-xBr<sub>x</sub> film for efficient perovskite solar cells exceeding 18%. *Sci. Rep.* **2017**, *7* (1), 44603; (e) Zhang, Z. L.; Men, B. Q.; Liu, Y. F.; Gao, H. P.; Mao, Y. L., Effects of precursor solution composition on the performance and I-V hysteresis of perovskite solar cells based on CH<sub>3</sub>NH<sub>3</sub>PbI<sub>3</sub>-xCl<sub>x</sub>. *Nanoscale Res. Lett.* **2017**, *12* (1), 84.

28. Zunger, A., Pseudopotential and all-electron atomic core size scales. *J. Chem. Phys.* **1981**, *74* (7), 4209-4211.

29. Allred, A. L.; Rochow, E. G., A scale of electronegativity based on electrostatic force. *J. Inorg. Nucl. Chem.* **1958**, *5* (4), 264-268.

30. Bartel, C. J.; Sutton, C.; Goldsmith, B. R.; Ouyang, R.; Musgrave, C. B.; Ghiringhelli, L. M.; Scheffler, M., New tolerance factor to predict the stability of perovskite oxides and halides. *Sci. Adv.* **2019**, *5* (2), eaav0693.

31. Kim, H.-S.; Lee, C.-R.; Im, J.-H.; Lee, K.-B.; Moehl, T.; Marchioro, A.; Moon, S.-J.; Humphry-Baker, R.; Yum, J.-H.; Moser, J. E.; Grätzel, M.; Park, N.-G., Lead Iodide Perovskite Sensitized All-Solid-State Submicron Thin Film Mesoscopic Solar Cell with Efficiency Exceeding 9%. *Sci. Rep.* **2012**, *2* (1), 591.

32. Hanusch, F. C.; Wiesenmayer, E.; Mankel, E.; Binek, A.; Angloher, P.; Fraunhofer, C.; Giesbrecht, N.; Feckl, J. M.; Jaegermann, W.; Johrendt, D.; Bein, T.; Docampo, P., Efficient Planar Heterojunction Perovskite Solar Cells Based on Formamidinium Lead Bromide. *J. Phys. Chem. L* **2014**, *5* (16), 2791-2795.

33. Jokar, E.; Chien, C.-H.; Tsai, C.-M.; Fathi, A.; Diau, E. W.-G., Robust Tin-Based Perovskite Solar Cells with Hybrid Organic Cations to Attain Efficiency Approaching 10%. *Adv. Mater.* **2019**, *31* (2), 1804835.

34. Chen, Z.; Zheng, X.; Yao, F.; Ma, J.; Tao, C.; Fang, G., Methylammonium, formamidinium and ethylenediamine mixed triple-cation perovskite solar cells with high efficiency and remarkable stability. *J. Mater. Chem. A* **2018**, *6* (36), 17625-17632.

35. Rebecca, L. W. X.; Burhanudin, Z. A.; Abdullah, M.; Saheed, M. S. M., Structural changes and band gap tunability with incorporation of n-butylammonium iodide in perovskite thin film. *Heliyon* **2020**, *6* (2), e03364.

36. Mittal, M.; Jana, A.; Sarkar, S.; Mahadevan, P.; Sapra, S., Size of the Organic Cation Tunes the Band Gap of Colloidal Organolead Bromide Perovskite Nanocrystals. *J. Phys. Chem. L* **2016**, *7* (16), 3270-3277.

37. Weber, S.; Rath, T.; Kunert, B.; Resel, R.; Dimopoulos, T.; Trimmel, G., Dependence of material properties and photovoltaic performance of triple cation tin perovskites on the iodide to bromide ratio. *abrégeé en Monatssh. Chem.* **2019**, *150* (11), 1921-1927.

38. Xu, A. F.; Wang, R. T.; Yang, L. W.; Jarvis, V.; Britten, J. F.; Xu, G., Pyrrolidinium lead iodide from crystallography: a new perovskite with low bandgap and good water resistance. *Chem. Commun.* **2019**, *55* (22), 3251-3253.

39. Kesava, S. V.; Hassan, Y.; Privitera, A.; Varambhia, A.; Snaith, H. J.; Riede, M. K., Azetidinium as cation in lead mixed halide perovskite nanocrystals of optoelectronic quality. *AIP Adv.* **2020**, *10* (2), 025001.

40. Huang, Z.; Chen, B.; Sagar, L. K.; Hou, Y.; Proppe, A.; Kung, H.-T.; Yuan, F.; Johnston, A.;

Saidaminov, M. I.; Jung, E. H.; Lu, Z.-H.; Kelley, S. O.; Sargent, E. H., Stable, Bromine-Free, Tetragonal Perovskites with 1.7 eV Bandgaps via A-Site Cation Substitution. *ACS Mater. Lett.* **2020**, *2* (7), 869-872.

41. Zhang, S.; Lu, T.; Xu, P.; Tao, Q.; Li, M.; Lu, W., Predicting the Formability of Hybrid Organic–Inorganic Perovskites via an Interpretable Machine Learning Strategy. *J. Phys. Chem. L* **2021**, *12* (31), 7423-7430.
